# Supplementary material
Source: PubMed Central journal article supplement (PMC5923118)
Supplement: AAC.02417-17_zac005187146s1.pdf [file AAC.02417-17_zac005187146s1.pdf]

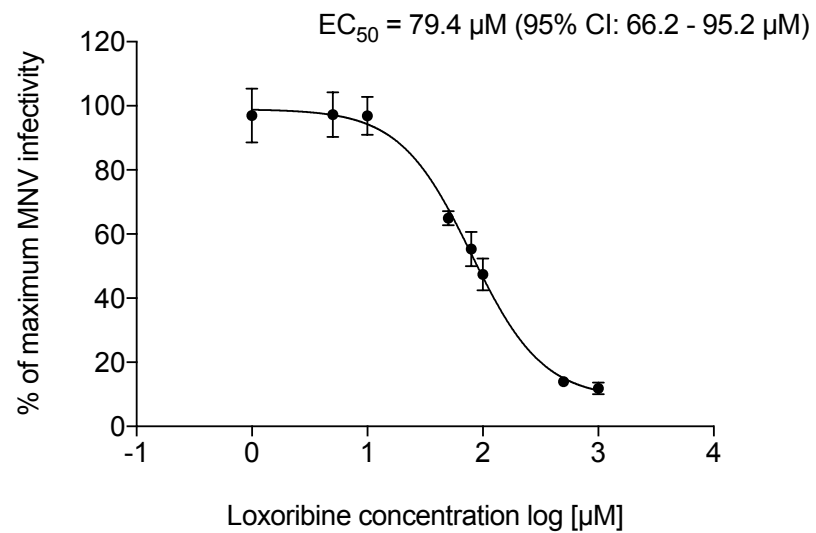

**Supplementary Figure 1. The TLR7 agonist Loxoribine displays antiviral activity against MNV infection.** The inhibitory effect of Loxoribine against MNV infection was determined in cell culture using the plaque reduction assay for 48 h. The percentage of MNV infectivity at each of eight Loxoribine concentrations (between 1 µM and 1 mM) were compared to the vehicle-only compound (DMSO) control and the half-maximal effective concentration calculated thereafter (EC<sub>50</sub>: 79.4 µM) along with the 95% confidence interval (CI). The mean ± SEM of three independent experiments performed in triplicate are presented.

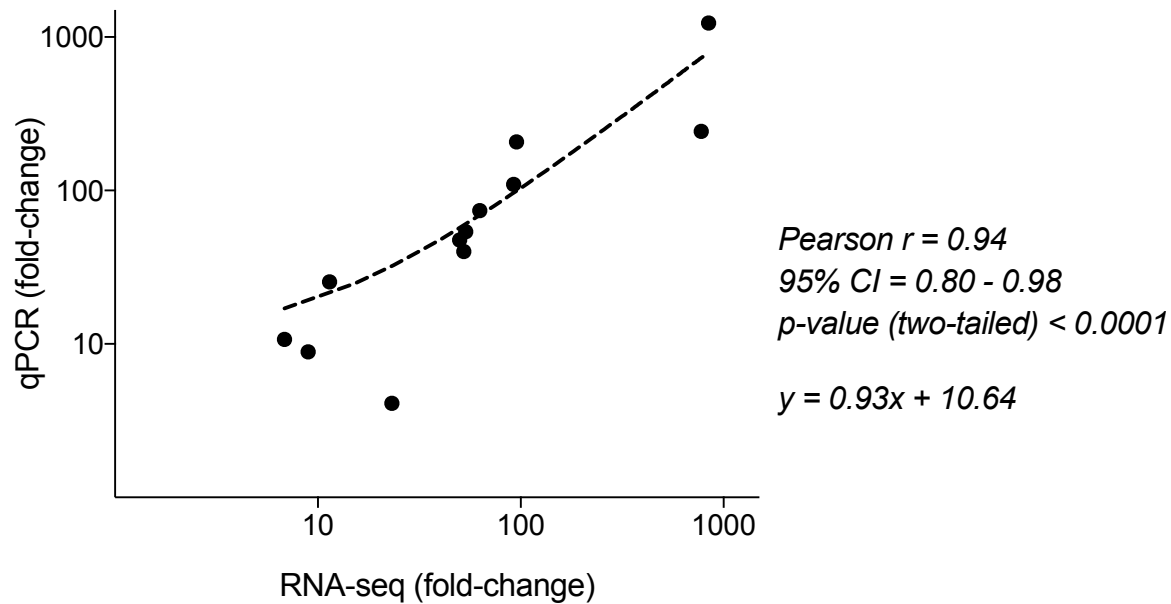

**Supplementary Figure 2. Correlation analysis of gene expression changes following Loxoribine treatment (12 h) measured by qRT-PCR and RNA-sequencing.** To validate the gene expression changes determined by RNA-sequencing analysis, we performed qRT-PCR of several key innate genes ( $n=12$ ) and plotted the fold changes generated from both techniques against one another. Linear regression analysis was performed to assess the level of correlation in gene expression values obtained from both methods. A Pearson coefficient of 0.94 was generated and a significant correlation exists ( $p$ -value < 0.0001). The following genes were queried: *Il1b*, *Il6*, *Oas2*, *Ddx58*, *Cd40*, *Ifih1*, *Stat1*, *Dhx58*, *Tnfa*, *Ccl4*, *Cxcl11* and *Cxcl10*.

**Supplementary Table 1.** DEG's in Loxoribine treated RAW264.7 cells.

| <b>Name</b> | <b>logFC</b> | <b>logCPM</b> | <b>PValue</b> | <b>adj.p.value</b> |
|-------------|--------------|---------------|---------------|--------------------|
| Il1a        | 11.48551887  | 8.078168087   | 3.3402E-159   | 1.3952E-156        |
| Gstt4       | 11.38354586  | 3.092897471   | 1.8311E-120   | 4.7191E-118        |
| Nos2        | 11.12619928  | 1.488147957   | 8.0515E-76    | 1.26659E-73        |
| Mx1         | 10.99857719  | 1.354536649   | 1.96553E-67   | 2.73661E-65        |
| Zbp1        | 10.37539786  | 5.557839891   | 7.3031E-253   | 2.2115E-249        |
| Zfp811      | 9.968348856  | 4.37720592    | 2.0971E-180   | 1.337E-177         |
| Gbp2b       | 9.917639211  | 4.009456353   | 7.027E-167    | 3.5466E-164        |
| Csf3        | 9.897062488  | 5.454573675   | 1.9863E-213   | 1.8508E-210        |
| Gbp5        | 9.841085025  | 2.697765101   | 9.6995E-99    | 1.99136E-96        |
| Ccl5        | 9.835816438  | 5.108375171   | 9.0146E-218   | 9.9268E-215        |
| Irg1        | 9.74886744   | 9.618778945   | 1.2214E-269   | 7.3974E-266        |
| Il1b        | 9.719755025  | 8.739421564   | 9.3397E-239   | 1.8855E-235        |
| Il6         | 9.600792692  | 1.975818904   | 3.71327E-90   | 7.1395E-88         |
| BC094916    | 9.537515566  | 1.215489678   | 1.15177E-54   | 1.2238E-52         |
| Apol9a      | 9.503567011  | 3.414745801   | 1.3466E-133   | 4.0779E-131        |
| Rsad2       | 9.418595261  | 5.661565155   | 5.9098E-259   | 2.3862E-255        |
| Oasl2       | 9.215162699  | 5.758722339   | 1.6955E-233   | 2.5672E-230        |
| Ifit3b      | 9.16833552   | 2.893239241   | 2.5726E-110   | 5.7707E-108        |
| Apol9b      | 9.114190278  | 3.460612684   | 6.5568E-119   | 1.6209E-116        |
| Pyhin1      | 8.873639418  | 3.586402788   | 1.1019E-117   | 2.6694E-115        |
| Ccl22       | 8.771789872  | 5.102805686   | 3.7761E-174   | 2.287E-171         |
| Isg15       | 8.524935497  | 5.046873187   | 5.2827E-212   | 4.2659E-209        |
| Mx2         | 8.423282626  | 4.374543041   | 2.7519E-161   | 1.2346E-158        |
| Ifit3       | 8.352265751  | 4.781314512   | 1.4949E-149   | 5.6587E-147        |
| Rtp4        | 8.26089545   | 6.600819187   | 1.7443E-247   | 4.2257E-244        |
| Lcn2        | 8.245569652  | 4.928432844   | 1.4924E-165   | 7.2311E-163        |
| Cmpk2       | 8.204419263  | 4.705484435   | 1.4735E-163   | 6.8648E-161        |
| Ifit1       | 8.15767186   | 6.390532073   | 1.4704E-224   | 1.7811E-221        |
| Ifi44       | 8.111382533  | 7.5524883     | 2.3534E-207   | 1.7817E-204        |
| Ifit1bl2    | 7.818790601  | 3.007847333   | 3.8121E-102   | 7.9614E-100        |
| Ifi202b     | 7.753516843  | 7.625160876   | 2.7555E-234   | 4.7683E-231        |
| Lix1        | 7.648397609  | 4.05893991    | 3.3059E-136   | 1.0538E-133        |
| Isg20       | 7.609023526  | 4.361993959   | 2.0598E-152   | 8.3169E-150        |
| Usp18       | 7.418810407  | 7.247072461   | 6.6997E-273   | 8.1154E-269        |
| Sfn5        | 7.328600804  | 7.5779746     | 1.1679E-212   | 1.0104E-209        |
| Ifi44l      | 7.286425831  | 4.491475384   | 2.1847E-143   | 7.6515E-141        |
| Ddx60       | 7.262227753  | 4.136626423   | 1.3395E-140   | 4.3851E-138        |
| Gbp9        | 7.103760495  | 2.433636559   | 6.05083E-84   | 1.11051E-81        |
| Cxcl2       | 7.06637508   | 6.485590444   | 8.8565E-182   | 5.9599E-179        |
| Lgals9      | 7.054360518  | 5.690141897   | 3.7613E-171   | 2.1137E-168        |
| Tgtp2       | 6.994656902  | 1.476191855   | 2.99499E-64   | 4.03092E-62        |
| Irf7        | 6.88278764   | 6.885841457   | 6.1451E-227   | 8.2706E-224        |

|          |             |             |             |             |
|----------|-------------|-------------|-------------|-------------|
| Gbp7     | 6.856861314 | 7.090430223 | 3.5313E-215 | 3.5645E-212 |
| Upp1     | 6.772549771 | 3.560065357 | 4.5832E-109 | 1.0094E-106 |
| Mnda     | 6.749461776 | 4.35149806  | 2.2109E-143 | 7.6515E-141 |
| Ccl4     | 6.576819012 | 8.093195452 | 1.10337E-53 | 1.12312E-51 |
| Ddx58    | 6.527118691 | 8.414900398 | 2.1851E-167 | 1.1508E-164 |
| Ccl3     | 6.523423413 | 11.31406513 | 1.86945E-98 | 3.77411E-96 |
| Gbp3     | 6.457415201 | 5.470176742 | 6.978E-185  | 4.972E-182  |
| Cish     | 6.383919341 | 1.090297206 | 4.06632E-44 | 3.28369E-42 |
| Lif      | 6.178856574 | 1.999051351 | 1.29381E-62 | 1.61566E-60 |
| Cd40     | 5.975584692 | 5.75338357  | 3.8389E-171 | 2.1137E-168 |
| Cd300e   | 5.959897889 | 4.590482016 | 2.0158E-123 | 5.3081E-121 |
| Il1f9    | 5.914076162 | 1.394905533 | 6.93214E-54 | 7.11602E-52 |
| Ccl7     | 5.901282535 | 4.017793017 | 5.11242E-64 | 6.73116E-62 |
| Ptgs2    | 5.778547028 | 9.134705463 | 6.2689E-141 | 2.1093E-138 |
| Dhx58    | 5.741688471 | 6.188006017 | 9.92925E-97 | 1.97169E-94 |
| H2-T24   | 5.713975562 | 6.500422049 | 2.888E-130  | 8.5322E-128 |
| Ifih1    | 5.711191458 | 6.827599737 | 1.298E-150  | 5.0717E-148 |
| Oas2     | 5.646588066 | 5.968688544 | 6.7122E-160 | 2.9038E-157 |
| Bcl2a1a  | 5.6304378   | 3.371785109 | 1.08021E-41 | 8.0769E-40  |
| Slc15a3  | 5.615286388 | 7.659015769 | 6.8227E-147 | 2.5044E-144 |
| Tnfrsf9  | 5.543964532 | 1.867059073 | 8.40997E-60 | 1.00861E-57 |
| Gbp2     | 5.510257997 | 3.044454679 | 3.1464E-39  | 2.17785E-37 |
| Gm14023  | 5.48034863  | 1.457473161 | 2.71222E-38 | 1.78549E-36 |
| Rhobtb1  | 5.461524709 | 2.237833066 | 2.49016E-55 | 2.71742E-53 |
| Ccl2     | 5.439378302 | 8.450137858 | 5.3533E-130 | 1.5439E-127 |
| Xaf1     | 5.403147985 | 4.792401403 | 1.6782E-124 | 4.5174E-122 |
| Hcar2    | 5.364872948 | 4.747251921 | 1.5323E-113 | 3.502E-111  |
| Ifi204   | 5.320026776 | 6.888799283 | 1.8002E-60  | 2.18058E-58 |
| Phlda1   | 5.259094929 | 3.138704341 | 1.28377E-77 | 2.07338E-75 |
| Socs3    | 5.169349387 | 8.175403424 | 9.6994E-125 | 2.6702E-122 |
| Trim34b  | 5.131848375 | 1.999922191 | 2.1E-55     | 2.3337E-53  |
| Scimp    | 5.049174567 | 2.509566318 | 1.21811E-53 | 1.22958E-51 |
| Vnn3     | 5.029698842 | 2.189622297 | 1.24169E-48 | 1.09785E-46 |
| Oas3     | 5.028565585 | 7.308804939 | 3.6759E-120 | 9.2762E-118 |
| Irgm2    | 5.007808273 | 5.126827724 | 8.348E-130  | 2.3516E-127 |
| Cd274    | 4.98932673  | 3.752886396 | 8.51556E-74 | 1.32242E-71 |
| Rnf125   | 4.958512178 | 1.80669326  | 1.73222E-32 | 9.20279E-31 |
| Procr    | 4.879936595 | 5.257260289 | 6.02923E-72 | 8.90635E-70 |
| Trim30a  | 4.784571029 | 7.650852721 | 2.0515E-116 | 4.8725E-114 |
| Al607873 | 4.751316349 | 5.8974411   | 2.74757E-79 | 4.62241E-77 |
| Parp14   | 4.69509503  | 8.062188407 | 2.565E-134  | 7.9668E-132 |
| Dusp5    | 4.652014614 | 4.37187136  | 2.64954E-78 | 4.39642E-76 |
| Csf1     | 4.601151442 | 2.521038867 | 9.98092E-53 | 9.74991E-51 |
| Il1rn    | 4.551165427 | 6.456971828 | 2.46123E-88 | 4.65827E-86 |
| Cxcl10   | 4.532187622 | 3.354537918 | 3.65105E-70 | 5.32834E-68 |

|          |             |             |             |             |
|----------|-------------|-------------|-------------|-------------|
| Igtp     | 4.494566581 | 4.681641784 | 2.0273E-79  | 3.45868E-77 |
| Ifi203   | 4.485018764 | 7.300659093 | 1.72419E-82 | 3.07134E-80 |
| Ccr12    | 4.481849546 | 1.205635583 | 2.11378E-31 | 1.07581E-29 |
| Fam214b  | 4.353426952 | 4.326114811 | 2.09179E-73 | 3.16724E-71 |
| Sdc3     | 4.289734968 | 4.721017865 | 4.65738E-78 | 7.62363E-76 |
| Arid5a   | 4.243205515 | 4.35777648  | 7.41918E-77 | 1.18248E-74 |
| Irgm1    | 4.217941456 | 7.166197963 | 9.1052E-114 | 2.121E-111  |
| Trim34a  | 4.199765276 | 2.803747487 | 9.07986E-51 | 8.52591E-49 |
| Il27     | 4.192681532 | 1.801351965 | 7.12903E-32 | 3.72215E-30 |
| Mmp13    | 4.189733868 | 3.136752732 | 3.26571E-39 | 2.24759E-37 |
| Nfkbiz   | 4.163462155 | 6.616644953 | 2.21456E-69 | 3.19344E-67 |
| Gstt1    | 4.117225649 | 2.311007402 | 7.90768E-35 | 4.58305E-33 |
| Phf11d   | 4.083704177 | 7.258037792 | 1.71407E-49 | 1.57292E-47 |
| Oasl1    | 4.057015851 | 5.903449431 | 1.2947E-103 | 2.8006E-101 |
| Siglec1  | 4.011323637 | 2.519287589 | 3.63083E-34 | 2.03612E-32 |
| Slfn8    | 3.978273289 | 7.161594059 | 6.3348E-65  | 8.7197E-63  |
| Stat2    | 3.97455436  | 6.766337771 | 2.16021E-59 | 2.56536E-57 |
| Ifit2    | 3.971335993 | 6.962454006 | 1.13373E-91 | 2.21497E-89 |
| Sema3e   | 3.967782378 | 3.180401534 | 4.92763E-38 | 3.15812E-36 |
| Oas1b    | 3.963812358 | 2.838599536 | 2.25182E-40 | 1.62359E-38 |
| Srgn     | 3.961106501 | 9.411403288 | 2.43231E-33 | 1.31529E-31 |
| Csprs    | 3.925140894 | 1.388941723 | 1.62381E-25 | 6.28409E-24 |
| Sp100    | 3.899328421 | 6.882967445 | 6.98738E-63 | 8.81648E-61 |
| Stx11    | 3.874952258 | 3.607480146 | 6.98847E-62 | 8.63789E-60 |
| Tmem132a | 3.808913021 | 3.460782598 | 1.13305E-45 | 9.46522E-44 |
| Lilr4b   | 3.805227298 | 7.40568171  | 1.05346E-43 | 8.23263E-42 |
| Slfn2    | 3.802816578 | 7.286060587 | 5.70329E-58 | 6.45644E-56 |
| Igf2bp2  | 3.786914382 | 6.224018135 | 4.97608E-38 | 3.17238E-36 |
| Slfn4    | 3.785102073 | 8.371521333 | 1.96769E-41 | 1.45333E-39 |
| Helz2    | 3.7686033   | 7.183525564 | 2.23424E-63 | 2.87908E-61 |
| Egr1     | 3.759382414 | 4.410548812 | 2.35489E-55 | 2.59316E-53 |
| Csf2     | 3.683457998 | 2.016454796 | 1.52653E-10 | 1.8849E-09  |
| Pou2f2   | 3.612109333 | 5.042887423 | 3.64599E-29 | 1.66656E-27 |
| Bcl2a1d  | 3.607911842 | 6.020443808 | 9.13592E-69 | 1.30192E-66 |
| Slc7a11  | 3.593243576 | 7.585089484 | 6.2156E-85  | 1.1583E-82  |
| Myc      | 3.582565752 | 4.468906667 | 4.2678E-54  | 4.41845E-52 |
| Basp1    | 3.57225395  | 4.701344267 | 8.78432E-35 | 5.06688E-33 |
| Mir155hg | 3.566481792 | 2.897788778 | 1.74496E-30 | 8.48862E-29 |
| Plaur    | 3.468952617 | 7.553280352 | 1.48175E-83 | 2.67888E-81 |
| Pla1a    | 3.458232122 | 1.749570917 | 2.05433E-27 | 8.762E-26   |
| Herc6    | 3.439557357 | 6.316048594 | 4.94254E-63 | 6.30199E-61 |
| Traf1    | 3.433714938 | 5.876742211 | 1.46301E-73 | 2.24322E-71 |
| Dgkh     | 3.326588958 | 4.045692122 | 2.88671E-55 | 3.12202E-53 |
| Lilrb4a  | 3.317574577 | 9.414708163 | 2.41504E-25 | 9.25742E-24 |
| Plekhn1  | 3.310658892 | 3.692369604 | 2.60051E-43 | 2.00637E-41 |

|           |             |             |             |             |
|-----------|-------------|-------------|-------------|-------------|
| Clec2d    | 3.296707545 | 2.220256019 | 5.76096E-36 | 3.48913E-34 |
| Pim1      | 3.290605308 | 5.041513032 | 8.77767E-43 | 6.72937E-41 |
| Creb5     | 3.278998654 | 1.906701011 | 1.43173E-21 | 4.40166E-20 |
| Agpat9    | 3.275500596 | 3.130097226 | 4.17764E-29 | 1.89527E-27 |
| Fcgr4     | 3.272221083 | 3.449883848 | 8.24481E-44 | 6.57035E-42 |
| Oas1g     | 3.271671511 | 4.533263235 | 1.43581E-44 | 1.17513E-42 |
| Zc3h12a   | 3.264948547 | 4.890576497 | 2.76856E-42 | 2.09597E-40 |
| Ptges     | 3.261346513 | 1.163873785 | 3.17278E-20 | 8.75441E-19 |
| Nod2      | 3.260415992 | 3.494336329 | 7.95218E-39 | 5.38127E-37 |
| Epsti1    | 3.257249469 | 6.257023877 | 2.27169E-52 | 2.18389E-50 |
| Tnfrsf1b  | 3.223118603 | 6.79756619  | 6.6107E-68  | 9.31109E-66 |
| Samd9l    | 3.196866216 | 8.152558644 | 5.94028E-35 | 3.47607E-33 |
| Ikbke     | 3.190398362 | 6.500333315 | 1.38029E-80 | 2.38849E-78 |
| Slc31a2   | 3.18490358  | 5.078427783 | 2.28857E-64 | 3.11477E-62 |
| Stat1     | 3.162667776 | 9.049762883 | 9.90706E-50 | 9.16063E-48 |
| BC021614  | 3.159331149 | 1.731987457 | 5.43644E-09 | 5.4349E-08  |
| Mlkl      | 3.13100578  | 7.167215644 | 4.7467E-37  | 2.97911E-35 |
| Map1b     | 3.128952068 | 3.549156225 | 2.91757E-21 | 8.74765E-20 |
| Gadd45a   | 3.128475926 | 1.610434423 | 1.34823E-23 | 4.66602E-22 |
| Pim2      | 3.126795966 | 3.670269106 | 5.01563E-22 | 1.58214E-20 |
| Lgals3bp  | 3.125177473 | 6.253943204 | 3.52505E-36 | 2.16746E-34 |
| Plek      | 3.104357608 | 10.90437413 | 1.06494E-39 | 7.58357E-38 |
| Thbs1     | 3.100082985 | 2.708954337 | 1.10576E-26 | 4.52503E-25 |
| Perm1     | 3.095317007 | 1.130110877 | 1.7126E-12  | 2.57698E-11 |
| Irak3     | 3.077781528 | 6.586082585 | 4.83242E-25 | 1.81786E-23 |
| Eif2ak2   | 3.04240435  | 8.914241615 | 8.1489E-34  | 4.48671E-32 |
| Stap1     | 3.023153641 | 8.145595922 | 3.75515E-64 | 4.99847E-62 |
| Ccl9      | 3.016182883 | 10.95358418 | 4.48178E-32 | 2.36034E-30 |
| Oas1a     | 2.99184702  | 5.8067235   | 4.224E-48   | 3.68096E-46 |
| Phf11b    | 2.990203085 | 3.914514738 | 2.23224E-29 | 1.03598E-27 |
| Stk40     | 2.944604106 | 5.464375646 | 4.2384E-58  | 4.8895E-56  |
| Trafd1    | 2.944387578 | 6.115820793 | 6.26069E-53 | 6.1655E-51  |
| C3ar1     | 2.941976549 | 6.893906188 | 3.35898E-72 | 5.02313E-70 |
| Bcl2a1b   | 2.93128643  | 6.232582523 | 4.74101E-58 | 5.41773E-56 |
| Ehd1      | 2.9202605   | 8.724766442 | 1.33894E-53 | 1.34037E-51 |
| Cpd       | 2.9147434   | 9.924435704 | 2.21482E-43 | 1.71975E-41 |
| Gadd45b   | 2.914741761 | 4.728389049 | 3.88427E-52 | 3.70474E-50 |
| Ilgax     | 2.91141094  | 3.17372556  | 6.55572E-31 | 3.2412E-29  |
| Batf2     | 2.906873414 | 1.396315651 | 6.0204E-18  | 1.44693E-16 |
| Casp4     | 2.884288954 | 4.152381979 | 2.46238E-37 | 1.55348E-35 |
| Marcks    | 2.848117964 | 3.849215772 | 1.07058E-39 | 7.58357E-38 |
| Gimap6    | 2.831829037 | 1.619869865 | 1.24676E-09 | 1.37416E-08 |
| Slfn10-ps | 2.810980454 | 5.913355897 | 8.23353E-44 | 6.57035E-42 |
| Tnf       | 2.777913654 | 8.429346652 | 4.98524E-45 | 4.10791E-43 |
| Klra2     | 2.758485027 | 1.941421039 | 7.70784E-23 | 2.56497E-21 |

|               |             |             |             |             |
|---------------|-------------|-------------|-------------|-------------|
| Irf9          | 2.747734682 | 5.725207615 | 1.40025E-58 | 1.64673E-56 |
| Parp9         | 2.7436671   | 7.217067567 | 7.0957E-64  | 9.24196E-62 |
| Cpm           | 2.743388984 | 2.651067467 | 8.92059E-30 | 4.18818E-28 |
| Dgka          | 2.74315353  | 2.045062273 | 1.7921E-25  | 6.89134E-24 |
| Uba7          | 2.72066559  | 5.222628197 | 3.10773E-34 | 1.75088E-32 |
| Zfp36         | 2.712317785 | 6.284903125 | 5.24337E-28 | 2.29289E-26 |
| Bcl2l11       | 2.708194429 | 5.862722347 | 4.95332E-39 | 3.3898E-37  |
| Tnip1         | 2.704015264 | 7.775717447 | 2.43988E-42 | 1.85876E-40 |
| Cd80          | 2.700991429 | 3.189243188 | 1.23599E-22 | 4.05732E-21 |
| Tap1          | 2.69486679  | 5.529070102 | 1.57916E-25 | 6.13088E-24 |
| Marcksl1      | 2.689553579 | 7.57470969  | 1.75786E-52 | 1.70344E-50 |
| 1300002E11Rik | 2.688848687 | 3.655012235 | 7.85982E-12 | 1.11092E-10 |
| Ppard         | 2.682022564 | 2.471256356 | 8.62283E-24 | 3.04514E-22 |
| Errfi1        | 2.674389099 | 5.745199637 | 8.75249E-49 | 7.79551E-47 |
| Rffl          | 2.67354253  | 4.762111628 | 3.84013E-48 | 3.37068E-46 |
| Car13         | 2.669940707 | 5.459593656 | 1.86124E-54 | 1.94356E-52 |
| Gm16712       | 2.657808142 | 2.169432827 | 2.3513E-18  | 5.78888E-17 |
| Ier3          | 2.650016315 | 6.440277719 | 3.76399E-46 | 3.1662E-44  |
| Cd82          | 2.648424087 | 5.768138049 | 9.74617E-44 | 7.66593E-42 |
| Tmem171       | 2.64810432  | 4.528865236 | 4.64639E-35 | 2.74545E-33 |
| Pml           | 2.635046498 | 5.818237322 | 2.52292E-44 | 2.05102E-42 |
| Bcl3          | 2.633426131 | 3.830403601 | 6.54221E-19 | 1.66134E-17 |
| Itga5         | 2.617747481 | 7.086584081 | 2.30686E-37 | 1.46298E-35 |
| Tor3a         | 2.613300122 | 8.191893647 | 1.27035E-51 | 1.20216E-49 |
| Parp12        | 2.574979047 | 7.743388168 | 8.34038E-55 | 8.94044E-53 |
| Fam19a2       | 2.56461204  | 2.176274231 | 2.93552E-15 | 5.85798E-14 |
| H2-T23        | 2.556359044 | 3.898659959 | 2.01948E-29 | 9.40842E-28 |
| Cflar         | 2.53712738  | 7.901943225 | 1.52234E-39 | 1.05978E-37 |
| Mndal         | 2.507600044 | 7.135846472 | 2.16081E-19 | 5.6288E-18  |
| Smim3         | 2.496350009 | 4.300472208 | 1.84326E-29 | 8.62061E-28 |
| Ticam1        | 2.488807984 | 4.447676904 | 1.51954E-31 | 7.83243E-30 |
| Pde4b         | 2.476476518 | 5.301514955 | 4.47169E-48 | 3.86897E-46 |
| Micall2       | 2.475923398 | 4.202713292 | 4.16674E-29 | 1.89527E-27 |
| Slc11a1       | 2.459876444 | 7.573359583 | 1.93202E-45 | 1.60292E-43 |
| Galnt3        | 2.4510657   | 4.530608871 | 6.53112E-36 | 3.93589E-34 |
| Tlr3          | 2.429545201 | 3.838711533 | 2.56366E-30 | 1.23228E-28 |
| Trem1         | 2.429081522 | 3.154061156 | 2.08282E-26 | 8.43786E-25 |
| Osm           | 2.422085944 | 2.847178353 | 8.14934E-25 | 3.01875E-23 |
| Trim21        | 2.413149194 | 5.131905076 | 9.327E-44   | 7.38418E-42 |
| Sdc4          | 2.395220708 | 7.92827563  | 4.69689E-35 | 2.76181E-33 |
| F12           | 2.393987404 | 1.808309507 | 7.5935E-08  | 6.2785E-07  |
| C3            | 2.384382747 | 4.787155948 | 3.93581E-33 | 2.10949E-31 |
| Parp10        | 2.372325118 | 5.243168402 | 7.65092E-30 | 3.60606E-28 |
| Ube2l6        | 2.371512224 | 6.395328815 | 5.50981E-20 | 1.49978E-18 |
| Aim1l         | 2.368580686 | 1.069888515 | 6.28337E-17 | 1.39711E-15 |

|           |             |             |             |             |
|-----------|-------------|-------------|-------------|-------------|
| Nfkbia    | 2.353683386 | 8.253165515 | 2.15645E-38 | 1.43523E-36 |
| Cd83      | 2.344783106 | 5.207401681 | 1.90942E-20 | 5.37878E-19 |
| Ptprj     | 2.341432699 | 8.417951846 | 6.58872E-25 | 2.44813E-23 |
| Icosl     | 2.337233552 | 3.569778391 | 2.81935E-27 | 1.18992E-25 |
| Dtx3l     | 2.336125285 | 6.848607613 | 2.16088E-47 | 1.85637E-45 |
| Gm5431    | 2.331631415 | 1.54548313  | 2.01245E-18 | 4.97485E-17 |
| Plk2      | 2.324521797 | 3.151254913 | 3.64373E-23 | 1.23632E-21 |
| Nckap1    | 2.323644981 | 2.564151252 | 1.00389E-14 | 1.90002E-13 |
| Prokr1    | 2.31035823  | 1.172193095 | 7.02217E-09 | 6.91541E-08 |
| St3gal1   | 2.310122468 | 5.060086218 | 6.84433E-30 | 3.23849E-28 |
| Arid3b    | 2.306501568 | 1.773110077 | 5.69539E-17 | 1.2752E-15  |
| Filip1l   | 2.291284231 | 7.193950856 | 1.42181E-18 | 3.55835E-17 |
| Tet2      | 2.290319367 | 7.781427542 | 1.09247E-21 | 3.40184E-20 |
| Trex1     | 2.282069968 | 5.810373144 | 3.69446E-36 | 2.26015E-34 |
| Ebi3      | 2.275780423 | 3.081391506 | 4.15859E-15 | 8.16419E-14 |
| Trim12c   | 2.257991088 | 5.546060709 | 1.90652E-27 | 8.16032E-26 |
| Abtb2     | 2.257108928 | 3.218326929 | 7.91341E-16 | 1.64699E-14 |
| St3gal6   | 2.245565155 | 5.653399213 | 2.2867E-29  | 1.05721E-27 |
| Atp6v0a1  | 2.242197659 | 5.911744567 | 1.25448E-34 | 7.20166E-33 |
| Adora2b   | 2.210606711 | 4.160396493 | 1.1246E-17  | 2.65541E-16 |
| Ifi35     | 2.194913177 | 5.690659844 | 5.00886E-26 | 2.01569E-24 |
| Prrg4     | 2.191317935 | 3.873255704 | 3.00264E-25 | 1.13659E-23 |
| Fam46a    | 2.19087141  | 5.412931417 | 1.7955E-35  | 1.06612E-33 |
| Maff      | 2.182508891 | 2.653544007 | 8.95102E-19 | 2.24945E-17 |
| Fndc3a    | 2.181381166 | 7.668160211 | 8.65314E-26 | 3.41419E-24 |
| Tubb2b    | 2.177995666 | 1.590076255 | 7.69967E-18 | 1.83595E-16 |
| Ell2      | 2.173842596 | 8.529376981 | 1.28974E-21 | 3.98536E-20 |
| Mr1       | 2.170649282 | 1.239380128 | 7.54358E-12 | 1.07248E-10 |
| Rab11fip1 | 2.163170477 | 6.096674358 | 3.3112E-24  | 1.19727E-22 |
| Itgal     | 2.139914032 | 4.37998957  | 2.32332E-12 | 3.43618E-11 |
| Rhbdf2    | 2.132095506 | 5.385539542 | 2.93701E-28 | 1.31763E-26 |
| Ms4a6d    | 2.126362601 | 6.01749438  | 5.82937E-33 | 3.11062E-31 |
| Arhgef3   | 2.100578285 | 3.998688486 | 8.07058E-23 | 2.67833E-21 |
| Etv4      | 2.100205621 | 1.24180298  | 1.55388E-12 | 2.35572E-11 |
| Bcl2l1    | 2.094922942 | 6.426111555 | 4.87877E-38 | 3.14343E-36 |
| Rel       | 2.093177861 | 5.539265049 | 4.80756E-31 | 2.40636E-29 |
| Pstpip2   | 2.073269908 | 6.310451298 | 2.11866E-33 | 1.15601E-31 |
| Trib1     | 2.065501016 | 4.733071055 | 2.76979E-27 | 1.17309E-25 |
| Glrx      | 2.059070328 | 6.24555833  | 2.38389E-33 | 1.29489E-31 |
| Kdm6b     | 2.05411731  | 2.359065426 | 1.03267E-15 | 2.13095E-14 |
| Bcorl1    | 2.037714332 | 2.750070321 | 1.59071E-11 | 2.19207E-10 |
| Pilra     | 2.035381929 | 4.284391615 | 7.19927E-26 | 2.86858E-24 |
| Zyx       | 2.032541399 | 4.899526429 | 1.91755E-16 | 4.14033E-15 |
| Flrt2     | 2.030106852 | 7.239544483 | 1.43497E-36 | 8.91372E-35 |
| Nfkb2     | 2.025234118 | 6.193945626 | 2.76976E-25 | 1.05504E-23 |



|               |             |             |             |             |
|---------------|-------------|-------------|-------------|-------------|
| Dusp1         | 2.023793465 | 4.061624867 | 1.93454E-19 | 5.06114E-18 |
| Rnf19b        | 2.021744821 | 6.640619042 | 6.42353E-35 | 3.74078E-33 |
| Jdp2          | 2.019259346 | 7.747079349 | 1.96642E-21 | 5.95481E-20 |
| Syk           | 2.015112676 | 7.407272436 | 1.73918E-33 | 9.53241E-32 |
| Nlrp3         | 2.009116344 | 7.118003699 | 1.54023E-38 | 1.03076E-36 |
| Mfap3l        | 2.003559295 | 2.598936717 | 4.86363E-11 | 6.34156E-10 |
| Spred3        | 1.995366295 | 1.293114353 | 1.23825E-08 | 1.17063E-07 |
| Lgals8        | 1.993451198 | 7.114226738 | 3.72253E-33 | 2.00404E-31 |
| Nlrc5         | 1.992239101 | 5.265999404 | 3.02764E-27 | 1.26899E-25 |
| LOC100041034  | 1.978183676 | 3.783650291 | 1.86222E-11 | 2.54595E-10 |
| Polm          | 1.975504752 | 2.669761913 | 8.21178E-15 | 1.56892E-13 |
| Gas7          | 1.973523058 | 8.335767889 | 8.54995E-24 | 3.02823E-22 |
| Lck           | 1.970778045 | 2.423735667 | 1.81138E-14 | 3.3194E-13  |
| Rhoc          | 1.962732186 | 6.760367247 | 2.72384E-36 | 1.68336E-34 |
| Sp140         | 1.962552182 | 4.885348459 | 1.16738E-27 | 5.05017E-26 |
| Zc3h12c       | 1.957933417 | 7.086756087 | 4.9268E-34  | 2.75015E-32 |
| Fyb           | 1.949665941 | 8.338509592 | 9.06649E-15 | 1.72677E-13 |
| Cpeb4         | 1.947016145 | 6.701363706 | 3.10254E-21 | 9.25641E-20 |
| Prkx          | 1.943426257 | 6.265828907 | 6.67054E-22 | 2.08786E-20 |
| I830077J02Rik | 1.941286675 | 1.500844471 | 3.47516E-13 | 5.57545E-12 |
| Il4ra         | 1.940424038 | 4.099337883 | 1.50985E-21 | 4.63009E-20 |
| S100a11       | 1.938645949 | 6.517145128 | 0.000418739 | 0.00154876  |
| Mxd1          | 1.936443739 | 3.551632521 | 2.93078E-21 | 8.76558E-20 |
| Enpp4         | 1.936091846 | 4.860831055 | 9.11078E-27 | 3.74098E-25 |
| Rassf4        | 1.933789834 | 8.30773234  | 2.4117E-29  | 1.10655E-27 |
| Flt3l         | 1.927484876 | 1.894338624 | 3.79552E-12 | 5.506E-11   |
| Gm8909        | 1.927441176 | 3.547571288 | 0.000134407 | 0.000572058 |
| Apobr         | 1.922118678 | 7.718708703 | 1.46327E-22 | 4.77752E-21 |
| Tnfrsf23      | 1.9219328   | 4.389022451 | 1.67104E-22 | 5.42661E-21 |
| Ifitm3        | 1.918135165 | 8.198496298 | 1.34193E-20 | 3.82249E-19 |
| Cd44          | 1.912364042 | 9.205649619 | 3.93818E-17 | 8.94993E-16 |
| Cdk6          | 1.908487368 | 6.969456439 | 3.57908E-25 | 1.35057E-23 |
| Plagl2        | 1.898729422 | 5.440085368 | 1.62262E-21 | 4.95083E-20 |
| Pvr           | 1.897433101 | 4.827400427 | 5.83768E-26 | 2.33372E-24 |
| Diap2         | 1.886874023 | 6.176365617 | 5.7101E-25  | 2.14138E-23 |
| Tapbp         | 1.885457852 | 6.822599437 | 8.7357E-23  | 2.89114E-21 |
| Rras          | 1.883838195 | 2.209293949 | 4.70351E-12 | 6.78257E-11 |
| Stat3         | 1.882423838 | 6.495515025 | 2.8029E-31  | 1.41465E-29 |
| AU022793      | 1.876771612 | 1.989192954 | 2.28423E-13 | 3.75425E-12 |
| Bcar1         | 1.874983335 | 1.430070982 | 2.44712E-07 | 1.87134E-06 |
| Trem12        | 1.873299819 | 2.971556341 | 5.70352E-14 | 1.00271E-12 |
| Hcls1         | 1.869633884 | 9.325455279 | 3.43519E-18 | 8.42317E-17 |
| Lrrc8d        | 1.868968995 | 6.874717243 | 5.21925E-28 | 2.29061E-26 |
| Itsn1         | 1.856113593 | 6.671645797 | 3.1189E-20  | 8.62539E-19 |
| Ms4a6c        | 1.849654984 | 5.01347594  | 1.16321E-25 | 4.54516E-24 |

|               |             |             |             |             |
|---------------|-------------|-------------|-------------|-------------|
| Lima1         | 1.841120783 | 6.098147018 | 8.35595E-17 | 1.847E-15   |
| Pld3          | 1.837594951 | 5.761051154 | 6.60501E-19 | 1.67377E-17 |
| Trp53inp2     | 1.827182822 | 2.200997596 | 1.8142E-11  | 2.49154E-10 |
| Dnajb9        | 1.825944919 | 5.300337616 | 1.45961E-16 | 3.15718E-15 |
| Dusp16        | 1.820255192 | 5.111680439 | 1.18956E-27 | 5.12782E-26 |
| Furin         | 1.816911305 | 6.040853906 | 1.52074E-21 | 4.65171E-20 |
| Dst           | 1.812915367 | 8.810459872 | 8.20329E-21 | 2.35466E-19 |
| Apbb1ip       | 1.810512896 | 6.055090286 | 7.40526E-15 | 1.42381E-13 |
| Zrsr1         | 1.809308504 | 3.249084714 | 1.38925E-08 | 1.30248E-07 |
| Osgin2        | 1.806900668 | 6.130010363 | 2.73924E-25 | 1.0467E-23  |
| Wfs1          | 1.805877361 | 1.045071652 | 3.53202E-07 | 2.62314E-06 |
| Itgb2         | 1.800352545 | 8.511531771 | 1.05564E-19 | 2.81033E-18 |
| Daxx          | 1.797280398 | 5.693979485 | 1.19116E-24 | 4.37226E-23 |
| Fcgr2b        | 1.79590922  | 5.159435235 | 6.95464E-18 | 1.66485E-16 |
| 6530402F18Rik | 1.791776457 | 3.516367397 | 4.35275E-14 | 7.70832E-13 |
| Kctd12        | 1.790276737 | 6.097675475 | 3.71734E-27 | 1.5368E-25  |
| Tlr6          | 1.788821436 | 4.177722359 | 2.71518E-20 | 7.54334E-19 |
| Ddt           | 1.786233552 | 4.573981677 | 3.04389E-10 | 3.61123E-09 |
| Arap1         | 1.784117968 | 6.895426809 | 1.39722E-21 | 4.30648E-20 |
| Gdpd1         | 1.78203108  | 2.639381289 | 1.35648E-13 | 2.29484E-12 |
| Serpine1      | 1.781513286 | 5.720462144 | 1.16922E-25 | 4.55396E-24 |
| Znfx1         | 1.776623382 | 7.735670614 | 8.83302E-20 | 2.37238E-18 |
| Tmem106a      | 1.773462081 | 5.629435292 | 2.80461E-24 | 1.01713E-22 |
| Hap1          | 1.772896753 | 4.635482346 | 1.5272E-22  | 4.97284E-21 |
| Mov10         | 1.768988524 | 4.274331851 | 1.19718E-13 | 2.03387E-12 |
| Adar          | 1.764633183 | 6.519513778 | 1.15732E-20 | 3.30627E-19 |
| Gch1          | 1.760853276 | 4.870607678 | 1.73061E-12 | 2.60086E-11 |
| Pkd1l3        | 1.756769855 | 1.192672694 | 1.67856E-08 | 1.55328E-07 |
| Tubb2a        | 1.756564649 | 4.50229621  | 7.08239E-21 | 2.05237E-19 |
| Ctif          | 1.754230176 | 2.953604325 | 1.16931E-10 | 1.4632E-09  |
| Napepld       | 1.750547089 | 5.414837538 | 4.28971E-20 | 1.17559E-18 |
| Clec4n        | 1.745852644 | 1.076309675 | 1.22308E-09 | 1.35052E-08 |
| Wfdc17        | 1.737299724 | 2.18547336  | 1.28818E-11 | 1.78736E-10 |
| Hivep1        | 1.733460004 | 5.602926529 | 2.49642E-15 | 4.99821E-14 |
| Cfb           | 1.732072365 | 1.489814765 | 2.00671E-08 | 1.82762E-07 |
| Nfkb1         | 1.719961828 | 8.288085321 | 1.37697E-22 | 4.50791E-21 |
| 5730508B09Rik | 1.715903375 | 4.835927302 | 4.00048E-15 | 7.86653E-14 |
| Rassf8        | 1.715158944 | 5.432394261 | 1.24473E-21 | 3.85611E-20 |
| Plk3          | 1.715003003 | 4.03416419  | 3.62134E-17 | 8.27647E-16 |
| Diap1         | 1.714734457 | 6.779047947 | 7.86421E-21 | 2.26269E-19 |
| Nfkbie        | 1.711144756 | 4.203982533 | 1.81213E-17 | 4.20504E-16 |
| Kdm5b         | 1.707430472 | 4.265172107 | 1.16618E-19 | 3.09778E-18 |
| P2rx4         | 1.700910389 | 4.351780714 | 6.18994E-14 | 1.08665E-12 |
| Slc11a2       | 1.700106806 | 6.029199775 | 4.83614E-18 | 1.17631E-16 |
| Ehd2          | 1.69862341  | 3.139341812 | 1.50318E-12 | 2.28744E-11 |

|               |             |             |             |             |
|---------------|-------------|-------------|-------------|-------------|
| Lrig1         | 1.69795114  | 1.440474631 | 2.44996E-08 | 2.19175E-07 |
| Mitd1         | 1.696609644 | 6.400466031 | 3.95411E-19 | 1.0169E-17  |
| Cd14          | 1.692401691 | 8.492797311 | 9.986E-10   | 1.11279E-08 |
| 1700109H08Rik | 1.691276968 | 2.105489648 | 2.5711E-08  | 2.29336E-07 |
| Denr          | 1.683739431 | 8.216361286 | 2.10336E-16 | 4.53346E-15 |
| Itgam         | 1.68368741  | 7.296419114 | 1.08437E-25 | 4.25079E-24 |
| Ppm1k         | 1.68058321  | 4.658789533 | 3.33901E-17 | 7.64565E-16 |
| Sass6         | 1.672077582 | 6.695291078 | 8.37059E-16 | 1.73618E-14 |
| Saa3          | 1.670287678 | 4.127375024 | 5.94603E-19 | 1.5195E-17  |
| Myo1e         | 1.667550801 | 7.918671429 | 2.4568E-15  | 4.92703E-14 |
| Casp8         | 1.663840939 | 7.445518863 | 8.52176E-21 | 2.44029E-19 |
| Sntb2         | 1.663766232 | 4.781929417 | 6.62437E-16 | 1.38347E-14 |
| Gramd1b       | 1.658162539 | 5.549613657 | 4.53649E-24 | 1.63058E-22 |
| Bst2          | 1.656662862 | 5.010696841 | 1.9702E-05  | 0.000103626 |
| Slc7a7        | 1.655097688 | 2.159096994 | 9.15388E-10 | 1.02668E-08 |
| Hk2           | 1.65292014  | 7.555822778 | 2.88655E-23 | 9.84924E-22 |
| Aff1          | 1.651564028 | 5.962520905 | 6.661E-13   | 1.03841E-11 |
| Prr13         | 1.648465704 | 4.960066421 | 2.04211E-13 | 3.37463E-12 |
| Zswim6        | 1.641711765 | 4.838232328 | 5.753E-20   | 1.56247E-18 |
| Prkce         | 1.640524117 | 3.271726173 | 9.96662E-11 | 1.25887E-09 |
| Lrp11         | 1.640208747 | 3.19437488  | 2.42563E-13 | 3.96514E-12 |
| Myo1d         | 1.634296025 | 4.559688596 | 3.49709E-14 | 6.23862E-13 |
| Tmem2         | 1.63216648  | 5.582721757 | 1.80085E-23 | 6.21472E-22 |
| Por           | 1.628656414 | 7.771506554 | 2.16074E-10 | 2.61469E-09 |
| Nabp1         | 1.626868712 | 5.033363031 | 1.02929E-19 | 2.75836E-18 |
| Tnfaip3       | 1.62655948  | 4.102272126 | 1.33566E-14 | 2.48905E-13 |
| Tor1aip1      | 1.62019297  | 7.140549623 | 2.97348E-25 | 1.12908E-23 |
| Parp11        | 1.618009647 | 4.857515684 | 2.25804E-21 | 6.82086E-20 |
| Arhgef12      | 1.617512582 | 6.248404042 | 7.69056E-21 | 2.21799E-19 |
| Peak1         | 1.615350603 | 7.884009501 | 6.8024E-19  | 1.7202E-17  |
| Cdkn1a        | 1.614815    | 5.48717549  | 1.31929E-13 | 2.23505E-12 |
| Rapgef2       | 1.613423934 | 6.687780031 | 1.12779E-23 | 3.94825E-22 |
| Ppp1r15a      | 1.612668869 | 4.674245585 | 2.91591E-16 | 6.24035E-15 |
| Ly96          | 1.61004709  | 3.590295146 | 5.30144E-10 | 6.12751E-09 |
| Per1          | 1.605824961 | 3.930807428 | 2.80219E-11 | 3.76308E-10 |
| Fosl1         | 1.604368451 | 1.942184271 | 6.57833E-09 | 6.51007E-08 |
| Crem          | 1.60077528  | 3.784661021 | 5.95251E-12 | 8.54297E-11 |
| Ktn1          | 1.600337631 | 7.593255509 | 6.1711E-11  | 7.96066E-10 |
| Pla2g5        | 1.597902753 | 4.948601078 | 6.43339E-20 | 1.73946E-18 |
| Spty2d1       | 1.597624941 | 6.200716454 | 8.13106E-16 | 1.68939E-14 |
| Fus           | 1.597217144 | 5.927251416 | 1.07795E-13 | 1.84164E-12 |
| N4bp1         | 1.595470943 | 6.844839636 | 1.05377E-19 | 2.81033E-18 |
| Odc1          | 1.593483201 | 8.363187823 | 6.10496E-21 | 1.79054E-19 |
| Zswim4        | 1.591106114 | 4.847867692 | 3.19358E-16 | 6.77474E-15 |
| Tgfb1         | 1.590980937 | 6.348439964 | 1.75718E-11 | 2.41626E-10 |

|               |             |             |             |             |
|---------------|-------------|-------------|-------------|-------------|
| lqcg          | 1.590890369 | 5.063370089 | 4.79151E-07 | 3.46298E-06 |
| Smox          | 1.589089659 | 6.036286352 | 3.2724E-22  | 1.04038E-20 |
| Casc4         | 1.588883808 | 3.633723946 | 3.95896E-08 | 3.40106E-07 |
| Sik3          | 1.585186761 | 6.206306846 | 2.09911E-13 | 3.46411E-12 |
| Dnajb5        | 1.584674426 | 1.468265526 | 6.40697E-08 | 5.35225E-07 |
| Prmt2         | 1.576992221 | 4.011299818 | 1.91166E-12 | 2.85603E-11 |
| Hivep3        | 1.5750539   | 3.730093678 | 4.13123E-08 | 3.54151E-07 |
| Ripk2         | 1.574758318 | 5.924312062 | 3.79321E-22 | 1.2028E-20  |
| Rgl3          | 1.57250478  | 1.406792921 | 6.17212E-08 | 5.15962E-07 |
| Pigl          | 1.572143437 | 3.986013143 | 1.95117E-09 | 2.08602E-08 |
| 5033406O09Rik | 1.5680265   | 2.055298449 | 1.68844E-09 | 1.82734E-08 |
| Nfkbib        | 1.567534096 | 5.471451395 | 7.27227E-23 | 2.4334E-21  |
| Daam1         | 1.564689553 | 6.176602691 | 7.58279E-20 | 2.04566E-18 |
| Rnd1          | 1.560664524 | 2.641751789 | 3.18154E-11 | 4.24896E-10 |
| B2m           | 1.560496782 | 10.96704807 | 4.28689E-05 | 0.000203876 |
| Myh10         | 1.559549423 | 3.083654187 | 5.94179E-10 | 6.83503E-09 |
| Slc2a1        | 1.557375201 | 7.372751839 | 4.1252E-20  | 1.13307E-18 |
| Nr1d1         | 1.555500824 | 2.260186243 | 1.71559E-08 | 1.58271E-07 |
| Mocos         | 1.553881099 | 3.007156174 | 1.43788E-12 | 2.19082E-11 |
| Qsox1         | 1.552467357 | 5.064947934 | 4.17341E-16 | 8.82243E-15 |
| Rbms1         | 1.549843731 | 7.483578365 | 1.7423E-14  | 3.19765E-13 |
| Tm9sf4        | 1.54857571  | 6.654652682 | 1.11247E-15 | 2.28783E-14 |
| Ccr1          | 1.545720515 | 1.258232211 | 5.81605E-08 | 4.8788E-07  |
| Parp3         | 1.544600419 | 4.285589484 | 7.88631E-15 | 1.50911E-13 |
| Gripap1       | 1.542470098 | 7.02142994  | 1.05302E-14 | 1.9868E-13  |
| Baz2a         | 1.54157208  | 5.285051158 | 1.02803E-16 | 2.25182E-15 |
| Stk10         | 1.537984591 | 7.553059566 | 3.86638E-13 | 6.1623E-12  |
| Lrrc25        | 1.537555482 | 4.508182766 | 4.62136E-09 | 4.66877E-08 |
| Antxr2        | 1.535160484 | 7.801014918 | 4.79886E-22 | 1.51772E-20 |
| Dusp2         | 1.533921433 | 4.407704787 | 1.13248E-06 | 7.68072E-06 |
| Anxa3         | 1.53375226  | 4.382204815 | 1.02332E-13 | 1.75573E-12 |
| Tnc           | 1.533751649 | 1.176397078 | 3.27467E-07 | 2.45003E-06 |
| Lamc1         | 1.532742975 | 7.473792947 | 1.89086E-14 | 3.4494E-13  |
| Trim26        | 1.523366783 | 6.571634198 | 1.38106E-20 | 3.90859E-19 |
| Fas           | 1.518959763 | 2.950011499 | 4.68339E-08 | 3.98664E-07 |
| Lrp12         | 1.516439188 | 5.084262567 | 4.38365E-20 | 1.19863E-18 |
| Nfat5         | 1.514876944 | 8.234421152 | 1.00439E-13 | 1.72854E-12 |
| Hgsnat        | 1.514863059 | 5.900244744 | 4.13548E-14 | 7.33428E-13 |
| Tnfrsf22      | 1.513748153 | 3.22421307  | 3.0443E-11  | 4.07016E-10 |
| Gsap          | 1.513592886 | 6.436876342 | 7.39131E-23 | 2.46642E-21 |
| Sqrdl         | 1.504615357 | 3.106060461 | 4.36139E-11 | 5.74234E-10 |
| Adam8         | 1.503419283 | 8.12980099  | 3.36163E-13 | 5.40045E-12 |
| Acot11        | 1.502776301 | 2.914149785 | 3.10571E-08 | 2.71817E-07 |
| Lyn           | 1.502426522 | 8.655519676 | 1.82679E-18 | 4.53442E-17 |
| Plekho2       | 1.500685061 | 7.231328586 | 1.78674E-18 | 4.4441E-17  |

|          |             |             |             |             |
|----------|-------------|-------------|-------------|-------------|
| Gstt3    | 1.499882494 | 4.272339917 | 5.11104E-14 | 9.01165E-13 |
| Sap130   | 1.497554988 | 5.776441822 | 6.92278E-08 | 5.76724E-07 |
| Cd52     | 1.496122404 | 7.054724004 | 5.34157E-21 | 1.57427E-19 |
| Ptpn23   | 1.493741487 | 4.100579175 | 6.96147E-12 | 9.9439E-11  |
| Arrdc4   | 1.486573676 | 3.660661985 | 9.94366E-13 | 1.52465E-11 |
| Fzd5     | 1.482688546 | 3.571624877 | 7.10053E-13 | 1.10268E-11 |
| Eif4g3   | 1.478716509 | 7.397652352 | 3.64007E-11 | 4.83466E-10 |
| Lrrc4    | 1.476665848 | 1.149206753 | 3.37395E-05 | 0.000165739 |
| Csrnp1   | 1.476583238 | 3.211414386 | 4.44718E-06 | 2.66677E-05 |
| Sgtb     | 1.475673236 | 3.093511268 | 2.86713E-08 | 2.53316E-07 |
| Msn      | 1.47024279  | 9.838795148 | 1.86248E-12 | 2.78865E-11 |
| Card6    | 1.467141934 | 1.986420804 | 1.45345E-07 | 1.14994E-06 |
| Mtf1     | 1.463763553 | 5.603047311 | 5.3286E-14  | 9.38159E-13 |
| Pik3r5   | 1.458659688 | 7.075919774 | 1.89706E-10 | 2.31178E-09 |
| Sesn2    | 1.458607981 | 2.968942899 | 1.78946E-08 | 1.64584E-07 |
| Pik3ap1  | 1.457658515 | 7.399998799 | 6.04186E-17 | 1.34779E-15 |
| Nmi      | 1.457168936 | 5.377179478 | 4.14269E-13 | 6.57672E-12 |
| Lxn      | 1.455788191 | 3.208557755 | 1.44124E-07 | 1.14103E-06 |
| Map3k8   | 1.455619333 | 4.3132934   | 1.96164E-15 | 3.97347E-14 |
| Birc3    | 1.455570238 | 5.958357872 | 2.25008E-16 | 4.84107E-15 |
| Etnk1    | 1.454662778 | 7.733616796 | 5.32426E-19 | 1.36348E-17 |
| Rnf114   | 1.453928972 | 6.618585992 | 1.8674E-19  | 4.90668E-18 |
| B3gnt3   | 1.453479447 | 2.756052126 | 5.87705E-10 | 6.77342E-09 |
| Gdi1     | 1.450402365 | 5.435061679 | 9.17501E-17 | 2.02067E-15 |
| Eif5b    | 1.450200286 | 8.568088529 | 4.25912E-11 | 5.62603E-10 |
| Lcp2     | 1.447884221 | 7.635990901 | 1.50588E-12 | 2.28868E-11 |
| Agrn     | 1.44587611  | 3.409063309 | 2.07436E-08 | 1.88639E-07 |
| Lims2    | 1.444656883 | 1.421400187 | 1.13566E-05 | 6.31312E-05 |
| Lacc1    | 1.443070433 | 4.849692564 | 3.8658E-13  | 6.1623E-12  |
| Ppp1r13b | 1.442181172 | 4.555487764 | 2.30749E-10 | 2.77563E-09 |
| Traf5    | 1.441397037 | 3.300866849 | 3.39865E-11 | 4.52394E-10 |
| Frk      | 1.43856103  | 3.943368908 | 1.99258E-10 | 2.42087E-09 |
| Ksr1     | 1.432603892 | 1.02865172  | 0.000100273 | 0.000441036 |
| Ccdc186  | 1.431079909 | 6.207299404 | 5.32541E-07 | 3.80795E-06 |
| Fbrs     | 1.422550474 | 3.560564057 | 9.24661E-09 | 8.93176E-08 |
| Supt6    | 1.42199117  | 8.361973241 | 1.77485E-09 | 1.9127E-08  |
| Prkd2    | 1.421933359 | 3.35892646  | 8.14968E-09 | 7.93545E-08 |
| Il1rap   | 1.420427142 | 5.628245458 | 2.75618E-12 | 4.05165E-11 |
| Trpm4    | 1.418164853 | 1.870030208 | 5.3195E-07  | 3.80597E-06 |
| Il2rg    | 1.418101615 | 5.621814582 | 9.78687E-14 | 1.68872E-12 |
| Zufsp    | 1.416835365 | 4.926892377 | 4.7057E-11  | 6.16885E-10 |
| Icam1    | 1.416709123 | 6.667842396 | 1.66346E-17 | 3.88238E-16 |
| Lrp4     | 1.414602102 | 3.160228922 | 2.08538E-10 | 2.52855E-09 |
| Tdrd7    | 1.413998338 | 5.819015212 | 2.67221E-14 | 4.81675E-13 |
| Pcyt1a   | 1.413959824 | 5.399421007 | 1.0303E-16  | 2.25272E-15 |

|          |             |             |             |             |
|----------|-------------|-------------|-------------|-------------|
| Samsn1   | 1.413472806 | 5.215754139 | 3.05757E-13 | 4.93819E-12 |
| Slfn9    | 1.412438554 | 6.746481545 | 2.45824E-10 | 2.94818E-09 |
| Dnajb4   | 1.412292611 | 4.623976471 | 1.46509E-11 | 2.02357E-10 |
| Siglece  | 1.412266669 | 2.638444687 | 1.32156E-09 | 1.45396E-08 |
| Specc1   | 1.410950493 | 7.585995144 | 5.42676E-13 | 8.50379E-12 |
| Id1      | 1.409268818 | 5.933863562 | 1.21364E-15 | 2.48745E-14 |
| Tmem184b | 1.408449536 | 4.97900616  | 4.68114E-13 | 7.39279E-12 |
| Fyco1    | 1.406029664 | 4.961179316 | 4.21885E-15 | 8.26909E-14 |
| Litaf    | 1.404992228 | 6.651628133 | 2.99562E-16 | 6.38837E-15 |
| Il18     | 1.403415595 | 4.152975576 | 1.51806E-12 | 2.3043E-11  |
| Cited2   | 1.40137553  | 8.249642018 | 6.7471E-07  | 4.73783E-06 |
| Degs1    | 1.400451772 | 7.979108256 | 1.20652E-17 | 2.83779E-16 |
| Micall1  | 1.398870332 | 4.962083641 | 2.06351E-12 | 3.06315E-11 |
| Slc7a8   | 1.397657849 | 3.080272704 | 9.86598E-08 | 8.00983E-07 |
| Rap1b    | 1.39530077  | 9.204942696 | 1.08349E-14 | 2.04112E-13 |
| Uso1     | 1.39040472  | 7.291715775 | 5.662E-12   | 8.13568E-11 |
| Ywhag    | 1.389676334 | 9.292442757 | 1.95845E-13 | 3.24969E-12 |
| Nupr1    | 1.387995734 | 4.526921807 | 6.96749E-09 | 6.86715E-08 |
| Tlr9     | 1.387181466 | 2.523553464 | 1.89744E-06 | 1.23303E-05 |
| Il10ra   | 1.38302134  | 5.256504649 | 1.75107E-17 | 4.07899E-16 |
| Tab2     | 1.380667172 | 7.94729874  | 1.62864E-08 | 1.51055E-07 |
| Zfand3   | 1.379554495 | 6.047955437 | 1.75739E-11 | 2.41626E-10 |
| Crtc2    | 1.378712973 | 3.822973978 | 3.30663E-09 | 3.39434E-08 |
| Fam222b  | 1.376563019 | 4.389372224 | 4.80851E-08 | 4.08453E-07 |
| Ptgs2os2 | 1.374994599 | 3.816385738 | 4.00402E-09 | 4.07227E-08 |
| Srpr     | 1.372863206 | 7.259209873 | 9.35388E-15 | 1.77871E-13 |
| Airn     | 1.368947607 | 1.501238873 | 0.000119255 | 0.000514253 |
| Cd74     | 1.368015551 | 7.560136813 | 2.927E-16   | 6.25304E-15 |
| Taok3    | 1.366844791 | 7.729627929 | 7.66019E-09 | 7.49499E-08 |
| Dnmt3l   | 1.364672553 | 2.230090242 | 2.03379E-06 | 1.31459E-05 |
| Eml2     | 1.364474911 | 4.171526401 | 3.4202E-08  | 2.9692E-07  |
| Sp110    | 1.3640854   | 4.600702447 | 7.44493E-14 | 1.29756E-12 |
| Mbd5     | 1.363842166 | 4.535059485 | 1.77473E-09 | 1.9127E-08  |
| Xcr1     | 1.362801632 | 1.113000337 | 9.76118E-06 | 5.4994E-05  |
| Ogfr     | 1.361913002 | 6.891704909 | 3.24635E-19 | 8.42035E-18 |
| Slpi     | 1.361320451 | 2.310433176 | 0.000321095 | 0.001232779 |
| Mapkbp1  | 1.360398929 | 4.247093701 | 7.8346E-13  | 1.21356E-11 |
| Zbtb7a   | 1.358455592 | 5.968820361 | 1.60831E-13 | 2.69827E-12 |
| Jak3     | 1.353542573 | 2.384809828 | 9.67387E-07 | 6.63531E-06 |
| Pde1b    | 1.352343563 | 4.246915626 | 1.81804E-10 | 2.2222E-09  |
| Taf3     | 1.350644118 | 5.119357338 | 4.5961E-10  | 5.3738E-09  |
| Alg2     | 1.350291088 | 5.031082532 | 4.55242E-14 | 8.05015E-13 |
| Rgl1     | 1.350264783 | 7.745691391 | 2.64368E-16 | 5.67781E-15 |
| Bag3     | 1.349878941 | 5.187467783 | 3.48047E-05 | 0.000170133 |
| Ypel3    | 1.349303891 | 1.386380193 | 4.69991E-06 | 2.81414E-05 |

|          |             |             |             |             |
|----------|-------------|-------------|-------------|-------------|
| Taf15    | 1.348382805 | 6.218054546 | 9.51856E-10 | 1.06462E-08 |
| Chst11   | 1.34660262  | 1.859154871 | 2.76803E-07 | 2.10346E-06 |
| Maml2    | 1.346475504 | 1.687631929 | 3.7174E-06  | 2.26162E-05 |
| Tuba1a   | 1.345508536 | 6.229493643 | 1.5326E-14  | 2.83426E-13 |
| Meis2    | 1.340765474 | 4.039284674 | 1.32988E-07 | 1.0584E-06  |
| Arhgef7  | 1.339080986 | 7.831215573 | 2.34498E-13 | 3.84493E-12 |
| Ms4a6b   | 1.338436527 | 3.372274315 | 3.38323E-07 | 2.52346E-06 |
| Sidt2    | 1.337082731 | 4.936699402 | 1.77771E-10 | 2.17729E-09 |
| Atn1     | 1.336294047 | 3.179458149 | 1.86757E-05 | 9.87424E-05 |
| Cnrip1   | 1.336282119 | 1.550173157 | 5.39305E-06 | 3.19599E-05 |
| Rilpl2   | 1.335953145 | 5.243698107 | 5.10275E-08 | 4.31933E-07 |
| Mapre2   | 1.334237917 | 6.122397126 | 6.71566E-11 | 8.62639E-10 |
| Ccnd2    | 1.332179771 | 6.831088961 | 1.70934E-12 | 2.57528E-11 |
| Fam161a  | 1.331795574 | 2.097872042 | 2.7866E-06  | 1.7435E-05  |
| Brd2     | 1.331254281 | 8.918435843 | 2.19071E-09 | 2.31554E-08 |
| Casp1    | 1.328953003 | 6.658423461 | 1.06434E-13 | 1.82354E-12 |
| Gyk      | 1.328088879 | 6.83264793  | 1.97911E-11 | 2.69662E-10 |
| Tank     | 1.326715054 | 7.976322254 | 5.77523E-05 | 0.000266091 |
| Prrc2c   | 1.326455082 | 9.52631135  | 2.3446E-06  | 1.49396E-05 |
| Lymr1    | 1.325203523 | 3.42634674  | 1.66973E-05 | 8.91774E-05 |
| Phf11c   | 1.325112461 | 2.288457928 | 3.61292E-07 | 2.67502E-06 |
| Arl8a    | 1.324820284 | 5.674805051 | 4.72871E-07 | 3.42372E-06 |
| Csf2rb   | 1.323766241 | 5.777850482 | 1.54996E-13 | 2.60759E-12 |
| L3mbtl3  | 1.323036873 | 2.877489035 | 1.90297E-09 | 2.03988E-08 |
| Ceacam1  | 1.322012233 | 2.742286553 | 1.09074E-07 | 8.79047E-07 |
| Dcbld2   | 1.321911686 | 6.04426034  | 4.95349E-15 | 9.66209E-14 |
| Dbt      | 1.318936169 | 6.028418911 | 1.6996E-13  | 2.84747E-12 |
| Cd164    | 1.317900068 | 7.321584793 | 5.49516E-17 | 1.23493E-15 |
| Tha1     | 1.317803628 | 2.039124044 | 3.46785E-06 | 2.12905E-05 |
| Cldn12   | 1.315985272 | 3.333626177 | 1.2439E-09  | 1.37226E-08 |
| Il13ra1  | 1.31571137  | 7.474458608 | 4.6755E-14  | 8.25574E-13 |
| Atp7a    | 1.315589866 | 6.656002191 | 4.57465E-12 | 6.6125E-11  |
| Dusp10   | 1.311975776 | 2.320194334 | 1.4292E-07  | 1.13223E-06 |
| Egr2     | 1.311591848 | 2.585039687 | 8.62337E-08 | 7.08649E-07 |
| Kctd13   | 1.311249401 | 4.649537412 | 6.49755E-10 | 7.42801E-09 |
| Nkiras1  | 1.308969615 | 3.224193453 | 3.25382E-08 | 2.83755E-07 |
| Cald1    | 1.308735446 | 1.840083615 | 2.75609E-05 | 0.000138813 |
| Foxp1    | 1.308689549 | 7.522144653 | 1.38476E-08 | 1.29928E-07 |
| Agpat4   | 1.306154363 | 4.284166509 | 1.20045E-08 | 1.13691E-07 |
| Rad54l2  | 1.303736151 | 6.113712345 | 2.78534E-13 | 4.51054E-12 |
| Fchsd1   | 1.302416109 | 2.603723263 | 2.37722E-06 | 1.51315E-05 |
| Als2     | 1.301222725 | 5.576043199 | 1.1361E-14  | 2.13027E-13 |
| Brd4     | 1.301141482 | 5.714590603 | 1.85106E-06 | 1.20548E-05 |
| Frmd6    | 1.298962132 | 2.525629021 | 2.07489E-07 | 1.5988E-06  |
| Ccdc109b | 1.297818091 | 5.911498658 | 2.54486E-13 | 4.14883E-12 |

|               |             |             |             |             |
|---------------|-------------|-------------|-------------|-------------|
| Il17ra        | 1.296108703 | 6.314197314 | 3.59264E-15 | 7.11073E-14 |
| Rac2          | 1.295351984 | 8.348720067 | 1.92385E-13 | 3.20105E-12 |
| Rmdn2         | 1.294492767 | 3.570159982 | 9.75115E-07 | 6.68075E-06 |
| Fgd6          | 1.292891822 | 6.104192059 | 4.91191E-13 | 7.73706E-12 |
| Carhsp1       | 1.290874723 | 4.885707237 | 5.41198E-09 | 5.4178E-08  |
| Dock10        | 1.281886937 | 9.346308704 | 1.94346E-10 | 2.36594E-09 |
| Tmem63b       | 1.281799861 | 4.514693314 | 2.34534E-10 | 2.81557E-09 |
| 2810474O19Rik | 1.281736943 | 7.915501927 | 5.43804E-09 | 5.4349E-08  |
| Sqstm1        | 1.28124919  | 8.086092532 | 2.67022E-14 | 4.81675E-13 |
| Gm6329        | 1.278368484 | 4.518782463 | 2.03179E-07 | 1.57159E-06 |
| Tnfsf9        | 1.277843116 | 5.780938378 | 8.57255E-10 | 9.64154E-09 |
| Myo6          | 1.276423151 | 3.805586465 | 1.20947E-10 | 1.50879E-09 |
| Zswim5        | 1.276196262 | 1.180359097 | 1.55668E-05 | 8.36558E-05 |
| Arid3a        | 1.275840299 | 5.384382498 | 1.48567E-14 | 2.75167E-13 |
| Nucb2         | 1.275207067 | 6.25849727  | 9.58292E-06 | 5.41156E-05 |
| Sh3pxd2b      | 1.273083723 | 6.718792241 | 4.07476E-09 | 4.14074E-08 |
| Zfp609        | 1.272153626 | 4.947367111 | 2.11999E-11 | 2.87563E-10 |
| Mid2          | 1.271408158 | 1.233868666 | 0.000130222 | 0.000556591 |
| Zfp9          | 1.269639105 | 2.062913079 | 6.10651E-07 | 4.32057E-06 |
| App           | 1.268199764 | 7.878476531 | 6.04086E-10 | 6.92925E-09 |
| Glrp1         | 1.267583839 | 3.105881076 | 2.74667E-05 | 0.000138454 |
| Dclre1c       | 1.267415795 | 5.18016949  | 2.02059E-12 | 3.01422E-11 |
| Mir22hg       | 1.267119365 | 2.364098432 | 0.000328453 | 0.001258237 |
| Shisa5        | 1.267069366 | 6.703130442 | 9.02337E-08 | 7.38514E-07 |
| Samd4b        | 1.265684456 | 4.605826678 | 1.62536E-09 | 1.76258E-08 |
| Ccdc122       | 1.265379187 | 3.245790834 | 5.27154E-06 | 3.12704E-05 |
| Zswim8        | 1.264502522 | 4.867493385 | 9.56465E-12 | 1.34249E-10 |
| Abca1         | 1.263716909 | 4.450927537 | 2.96567E-11 | 3.97381E-10 |
| Pnpla2        | 1.26296307  | 4.282297867 | 1.25544E-08 | 1.18436E-07 |
| Creb3l2       | 1.260478604 | 3.014413813 | 1.79434E-06 | 1.17232E-05 |
| Dlgap4        | 1.257252717 | 4.700981227 | 3.25507E-09 | 3.34993E-08 |
| Map9          | 1.25714957  | 1.237586213 | 4.37271E-06 | 2.62992E-05 |
| Tap2          | 1.25534947  | 4.895824618 | 8.09308E-10 | 9.11921E-09 |
| Slc25a22      | 1.253070011 | 4.62398197  | 4.41206E-09 | 4.4685E-08  |
| Actg1         | 1.25261046  | 7.043833323 | 1.13856E-13 | 1.93972E-12 |
| Dgat2         | 1.250665291 | 2.801655619 | 4.7502E-05  | 0.000224253 |
| Atf3          | 1.248333927 | 5.181146595 | 1.70495E-12 | 2.57186E-11 |
| Smap2         | 1.24690209  | 5.911116482 | 9.6775E-09  | 9.31085E-08 |
| Atxn1         | 1.246131679 | 5.258973954 | 2.53056E-12 | 3.73358E-11 |
| Igsf6         | 1.244246539 | 7.999881778 | 5.03826E-05 | 0.000235449 |
| Erich1        | 1.243264634 | 5.296018568 | 2.92113E-08 | 2.5771E-07  |
| H2-K2         | 1.242965567 | 2.17122613  | 6.87193E-07 | 4.81711E-06 |
| Rrbp1         | 1.242218877 | 8.363214203 | 8.40662E-09 | 8.17907E-08 |
| Trim25        | 1.241505266 | 6.909731385 | 7.65061E-12 | 1.08642E-10 |
| Ctsz          | 1.238424079 | 9.690148794 | 1.17781E-08 | 1.11896E-07 |



|               |             |             |             |             |
|---------------|-------------|-------------|-------------|-------------|
| Tor1aip2      | 1.237809119 | 8.703839673 | 5.31271E-12 | 7.64286E-11 |
| Sod2          | 1.236625292 | 7.720995806 | 7.11504E-15 | 1.37236E-13 |
| Irak2         | 1.236611373 | 5.426602123 | 6.26573E-12 | 8.98187E-11 |
| Fmn1          | 1.236297035 | 7.503564031 | 4.43836E-09 | 4.49138E-08 |
| Nckap5l       | 1.236090415 | 2.342098051 | 9.47402E-06 | 5.35755E-05 |
| Pla2g6        | 1.234946155 | 3.20866297  | 2.22854E-07 | 1.7085E-06  |
| Ahi1          | 1.232955277 | 5.425716088 | 5.18884E-13 | 8.15206E-12 |
| Slc4a7        | 1.230708854 | 8.146371445 | 2.51537E-14 | 4.54756E-13 |
| Cd47          | 1.229560116 | 5.862420851 | 1.05669E-06 | 7.21109E-06 |
| Whamm         | 1.229175379 | 4.534519776 | 3.53071E-10 | 4.16432E-09 |
| BC028528      | 1.228187645 | 2.963755477 | 3.01527E-06 | 1.8718E-05  |
| Gab2          | 1.227965912 | 5.445204302 | 2.19774E-08 | 1.98814E-07 |
| Mob3c         | 1.226661861 | 3.447774243 | 3.03298E-08 | 2.66607E-07 |
| Gpr84         | 1.226275094 | 4.570585073 | 9.25356E-10 | 1.0369E-08  |
| Med15         | 1.225324893 | 6.1634169   | 1.52623E-05 | 8.2202E-05  |
| Pxn           | 1.225170649 | 7.34495966  | 8.3947E-13  | 1.29535E-11 |
| Atp6v1d       | 1.222127576 | 7.133216445 | 2.7878E-05  | 0.000140119 |
| Brwd3         | 1.222020844 | 5.870377241 | 2.15002E-09 | 2.28016E-08 |
| Vamp2         | 1.221315562 | 2.010715512 | 8.79824E-07 | 6.08294E-06 |
| Dnajb2        | 1.2208012   | 3.826933417 | 4.16201E-10 | 4.87096E-09 |
| Jak2          | 1.215560079 | 7.305902367 | 4.07867E-13 | 6.48359E-12 |
| Braf          | 1.214834239 | 6.330377381 | 2.34892E-13 | 3.84493E-12 |
| Aak1          | 1.211758023 | 5.89204896  | 2.18955E-10 | 2.64691E-09 |
| Acy1          | 1.210765504 | 4.922864574 | 1.77866E-08 | 1.63964E-07 |
| Anxa7         | 1.209001028 | 7.762014142 | 1.4748E-14  | 2.73572E-13 |
| Stk3          | 1.208136149 | 7.195827378 | 2.7766E-05  | 0.000139672 |
| Glcci1        | 1.207891218 | 2.757847625 | 2.9872E-07  | 2.25727E-06 |
| Sec24a        | 1.207791367 | 5.625686524 | 7.71089E-09 | 7.5385E-08  |
| Cep83         | 1.207427878 | 8.291919279 | 2.79283E-06 | 1.74649E-05 |
| Pgm1          | 1.20336686  | 6.381845482 | 2.86762E-10 | 3.41212E-09 |
| Fam196b       | 1.201974237 | 3.267653729 | 3.71031E-07 | 2.74017E-06 |
| C920009B18Rik | 1.200569267 | 5.160476021 | 3.14786E-12 | 4.59952E-11 |
| Usb1          | 1.198713574 | 4.652001593 | 3.87887E-09 | 3.95495E-08 |
| Klf8          | 1.197766677 | 3.845456744 | 4.68018E-09 | 4.72425E-08 |
| Traf3ip2      | 1.197524987 | 4.849511068 | 1.11591E-10 | 1.40219E-09 |
| Btg2          | 1.195654865 | 4.982215427 | 2.9741E-08  | 2.61812E-07 |
| Homer1        | 1.195233514 | 6.082935527 | 3.34535E-10 | 3.96112E-09 |
| Grina         | 1.194570297 | 4.462905703 | 8.42462E-09 | 8.19E-08    |
| Ece1          | 1.194554148 | 2.902282115 | 1.64207E-06 | 1.081E-05   |
| Hoxb3         | 1.194318934 | 1.586452071 | 1.00722E-05 | 5.66147E-05 |
| Cnot3         | 1.192500865 | 5.287683288 | 8.24866E-05 | 0.000367203 |
| Tmem131       | 1.191460893 | 7.069743477 | 6.58067E-08 | 5.48978E-07 |
| Glipr2        | 1.190223196 | 1.855069134 | 1.62184E-05 | 8.68881E-05 |
| Csf2ra        | 1.188275362 | 5.769087984 | 1.59069E-07 | 1.25198E-06 |
| Slc38a6       | 1.187958289 | 4.364179131 | 7.95125E-11 | 1.0149E-09  |

|               |             |             |             |             |
|---------------|-------------|-------------|-------------|-------------|
| Shox2         | 1.186076798 | 2.718942649 | 0.000261314 | 0.001029029 |
| Gpatch11      | 1.185455119 | 6.334054674 | 5.77036E-05 | 0.000265968 |
| Fcgr1         | 1.184233314 | 6.236909189 | 2.21665E-14 | 4.0195E-13  |
| Trp53bp2      | 1.184014783 | 4.460817233 | 1.27147E-06 | 8.53256E-06 |
| Vps37c        | 1.183318751 | 4.272810651 | 2.64309E-08 | 2.35237E-07 |
| Tnfaip2       | 1.183015092 | 7.335797391 | 7.8413E-12  | 1.1096E-10  |
| Vprbp         | 1.182696851 | 6.240555406 | 5.27478E-11 | 6.86288E-10 |
| Dnajc1        | 1.18255377  | 6.618560377 | 2.06654E-06 | 1.33362E-05 |
| Zmat1         | 1.180515216 | 1.866579587 | 0.000131766 | 0.000562001 |
| Hck           | 1.176857195 | 7.377358734 | 9.41836E-14 | 1.62746E-12 |
| Mbnl2         | 1.176595875 | 7.976264295 | 3.12447E-10 | 3.7032E-09  |
| Mvp           | 1.176217797 | 6.415882948 | 3.76733E-13 | 6.02027E-12 |
| C130026I21Rik | 1.175030622 | 4.517479401 | 2.92423E-10 | 3.47427E-09 |
| Satb2         | 1.1735733   | 4.483880015 | 5.51257E-08 | 4.64675E-07 |
| Dhx40         | 1.17338853  | 5.136127642 | 1.14724E-10 | 1.43707E-09 |
| Whsc1l1       | 1.173223163 | 6.756299074 | 7.33659E-10 | 8.30543E-09 |
| Inpp4a        | 1.172355794 | 4.069470982 | 0.000142721 | 0.000604158 |
| Stambp        | 1.169268032 | 3.427554264 | 1.33704E-05 | 7.31836E-05 |
| Milr1         | 1.166925301 | 6.564557261 | 9.23917E-13 | 1.42203E-11 |
| Trip12        | 1.162898414 | 9.80421313  | 1.88546E-09 | 2.0247E-08  |
| Sgcb          | 1.162204923 | 4.445103422 | 1.02563E-10 | 1.29412E-09 |
| Wipf2         | 1.162094953 | 4.275088031 | 2.04556E-07 | 1.58022E-06 |
| Ttll1         | 1.16185744  | 3.091278068 | 2.28411E-06 | 1.45772E-05 |
| Hmga2         | 1.160663125 | 6.481439015 | 2.4809E-13  | 4.05002E-12 |
| Rgp1          | 1.160188922 | 4.44197322  | 3.88313E-08 | 3.33828E-07 |
| 2210018M11Rik | 1.160023447 | 6.250265833 | 0.000138838 | 0.000589464 |
| Alg12         | 1.158917897 | 4.571589479 | 8.08946E-07 | 5.62824E-06 |
| Acadsb        | 1.158446391 | 6.337603483 | 3.37997E-10 | 3.9982E-09  |
| Ap1s3         | 1.157779774 | 4.67102598  | 1.81706E-07 | 1.41726E-06 |
| Ahr           | 1.154965028 | 1.001505992 | 0.00048484  | 0.001756766 |
| 8430429K09Rik | 1.154080143 | 4.012921391 | 6.92779E-05 | 0.000313823 |
| Tmem120b      | 1.152825227 | 2.998397377 | 1.67449E-07 | 1.31367E-06 |
| Neu1          | 1.149944394 | 6.05663801  | 6.9747E-13  | 1.08452E-11 |
| Zak           | 1.149929919 | 7.852825023 | 1.23569E-12 | 1.89228E-11 |
| Gpkow         | 1.149908891 | 6.097453947 | 8.5975E-09  | 8.33799E-08 |
| Vimp          | 1.149178257 | 6.782507051 | 1.59286E-10 | 1.96113E-09 |
| Fam210b       | 1.148835339 | 2.763870511 | 3.4634E-07  | 2.57691E-06 |
| Spred2        | 1.14870976  | 4.278642849 | 7.52341E-08 | 6.23332E-07 |
| Tceb3         | 1.147630235 | 8.231880728 | 6.00101E-09 | 5.97782E-08 |
| C5ar1         | 1.143789723 | 3.357552569 | 2.94345E-06 | 1.83097E-05 |
| Asph          | 1.143572931 | 8.55665706  | 4.30948E-11 | 5.68017E-10 |
| Elf4          | 1.142524165 | 5.317577392 | 1.17474E-09 | 1.30069E-08 |
| Susd6         | 1.142163651 | 6.266256523 | 1.30496E-11 | 1.80857E-10 |
| Blnk          | 1.140828662 | 5.913054296 | 2.25227E-11 | 3.05166E-10 |
| Drosha        | 1.140416658 | 6.880750578 | 3.8033E-07  | 2.80057E-06 |

|               |             |             |             |             |
|---------------|-------------|-------------|-------------|-------------|
| Pcdhgc3       | 1.140388216 | 2.471013279 | 6.59839E-05 | 0.000300362 |
| Dopey2        | 1.140079267 | 3.513405836 | 6.14537E-05 | 0.000281859 |
| Rnf31         | 1.139856868 | 4.631147994 | 6.71247E-07 | 4.71625E-06 |
| Ern1          | 1.139119917 | 4.04945834  | 3.98279E-07 | 2.92031E-06 |
| Themis2       | 1.138080998 | 5.551384246 | 1.81416E-08 | 1.66544E-07 |
| Hacd2         | 1.137313673 | 4.139469994 | 1.50462E-05 | 8.12189E-05 |
| Adgre1        | 1.135490189 | 7.630311185 | 2.38837E-09 | 2.50479E-08 |
| AU040320      | 1.134855143 | 5.610697886 | 3.30014E-11 | 4.39764E-10 |
| Chmp4b        | 1.134409991 | 7.644744699 | 3.61893E-12 | 5.25613E-11 |
| Ssh1          | 1.13397343  | 2.639881321 | 6.38644E-06 | 3.74257E-05 |
| Psm11         | 1.133680897 | 6.835487036 | 4.89789E-13 | 7.72502E-12 |
| Nfil3         | 1.133667697 | 3.656161621 | 4.50715E-07 | 3.27309E-06 |
| Cpeb3         | 1.133478326 | 1.280745303 | 0.000167911 | 0.000696542 |
| Scaf4         | 1.133285096 | 5.653274566 | 6.33986E-07 | 4.48044E-06 |
| Clec16a       | 1.131083001 | 5.193482636 | 2.01016E-08 | 1.82938E-07 |
| Fam57a        | 1.130795969 | 3.29619362  | 1.27305E-05 | 7.01568E-05 |
| Rnf44         | 1.128004112 | 4.90393013  | 1.1534E-06  | 7.80944E-06 |
| Notch1        | 1.128001511 | 2.243820021 | 0.000708317 | 0.002444401 |
| Nt5dc3        | 1.1277041   | 5.010166435 | 2.36243E-09 | 2.47973E-08 |
| Crebbp        | 1.126484624 | 6.372164836 | 1.96405E-07 | 1.52308E-06 |
| Yes1          | 1.126449028 | 1.924617972 | 7.4722E-05  | 0.000336346 |
| 3110057012Rik | 1.12535348  | 1.996417935 | 2.60396E-05 | 0.000132029 |
| Cdc42bpa      | 1.125038717 | 2.86836752  | 1.42388E-06 | 9.47143E-06 |
| Mafk          | 1.124694791 | 5.694325149 | 3.66432E-11 | 4.86155E-10 |
| Sertad3       | 1.124252686 | 2.236920636 | 6.57355E-05 | 0.000299456 |
| Psm13         | 1.122854206 | 7.659253283 | 8.18744E-12 | 1.15322E-10 |
| Safb2         | 1.122691573 | 6.755645287 | 8.50008E-05 | 0.000377702 |
| Pcdh7         | 1.122308187 | 9.217994583 | 1.8033E-09  | 1.93991E-08 |
| Cd300lf       | 1.122254846 | 3.500808122 | 9.38956E-06 | 5.31724E-05 |
| Myh9          | 1.121773474 | 9.547981033 | 1.80388E-07 | 1.40789E-06 |
| Igf2r         | 1.118010988 | 7.280035125 | 2.84124E-09 | 2.9491E-08  |
| Hsp90ab1      | 1.117873435 | 12.27069151 | 9.04809E-05 | 0.000399998 |
| Ubap2         | 1.117403533 | 6.644137277 | 2.67689E-05 | 0.000135331 |
| Irf2          | 1.115918768 | 4.623044893 | 7.7223E-07  | 5.39448E-06 |
| Lym5          | 1.114919916 | 4.898374967 | 1.59312E-10 | 1.96113E-09 |
| Ficd          | 1.112860616 | 2.734298635 | 8.20849E-06 | 4.7042E-05  |
| Ppapdc1b      | 1.111743973 | 4.401371671 | 1.39277E-09 | 1.52675E-08 |
| Cmip          | 1.108679859 | 6.498128026 | 2.76817E-05 | 0.000139306 |
| Asah2         | 1.108106732 | 3.507315128 | 1.18647E-06 | 8.0078E-06  |
| Rbpms         | 1.108067774 | 2.896075679 | 1.53778E-05 | 8.27873E-05 |
| Prdm2         | 1.106359408 | 5.906763984 | 9.71236E-10 | 1.08429E-08 |
| Sec24b        | 1.104497358 | 6.05301377  | 2.78911E-08 | 2.47324E-07 |
| Zmiz2         | 1.102121636 | 4.842821165 | 3.19301E-08 | 2.79054E-07 |
| Trim56        | 1.10138881  | 5.535131884 | 9.55713E-12 | 1.34249E-10 |
| Rara          | 1.101120552 | 4.497809065 | 1.77894E-06 | 1.16352E-05 |

|               |             |             |             |             |
|---------------|-------------|-------------|-------------|-------------|
| Dot1l         | 1.100819138 | 5.985017669 | 5.21055E-10 | 6.03398E-09 |
| Lrp10         | 1.100816234 | 5.405046944 | 2.43891E-06 | 1.54835E-05 |
| Ppic          | 1.099779493 | 5.270029598 | 3.8126E-10  | 4.4837E-09  |
| Rusc1         | 1.098959881 | 3.736618026 | 2.96721E-08 | 2.61395E-07 |
| Zfp658        | 1.098768149 | 3.55679391  | 7.24501E-08 | 6.02325E-07 |
| Akap5         | 1.097877071 | 1.032606888 | 0.001961023 | 0.005884041 |
| Utrn          | 1.096450101 | 5.252163181 | 9.02763E-10 | 1.01345E-08 |
| Kctd21        | 1.095639569 | 1.766896716 | 0.000114521 | 0.000495487 |
| Stxbp3-ps     | 1.092348195 | 4.788713213 | 7.89219E-05 | 0.000353543 |
| Herpud1       | 1.092253181 | 6.496863949 | 4.26501E-11 | 5.62768E-10 |
| Ralgds        | 1.090230501 | 4.258648264 | 2.82533E-08 | 2.5017E-07  |
| Slc9a3r1      | 1.089921141 | 4.990645209 | 1.07884E-08 | 1.0306E-07  |
| Rhbdf1        | 1.08991484  | 1.800455208 | 2.95687E-05 | 0.000147333 |
| Pdcd1         | 1.089597714 | 4.290473466 | 6.02161E-05 | 0.000276392 |
| Renbp         | 1.089566849 | 4.964877753 | 2.83203E-10 | 3.37309E-09 |
| Phactr4       | 1.089461176 | 4.069539428 | 2.70551E-05 | 0.000136549 |
| Bzap1         | 1.088546416 | 2.889855745 | 0.000246908 | 0.000980589 |
| Ier5          | 1.088546227 | 6.251572546 | 4.78054E-10 | 5.57868E-09 |
| Ndel1         | 1.088463718 | 6.660887046 | 1.88952E-06 | 1.22854E-05 |
| Trim13        | 1.086946195 | 3.443343849 | 1.31755E-05 | 7.23348E-05 |
| Pik3r3        | 1.086751421 | 2.963501552 | 9.11113E-06 | 5.17894E-05 |
| Rusc2         | 1.086712777 | 5.101699436 | 1.08131E-07 | 8.72032E-07 |
| Efcab5        | 1.086407762 | 1.810433697 | 0.00029413  | 0.00114046  |
| Cln5          | 1.084840815 | 6.981628926 | 9.16104E-11 | 1.1644E-09  |
| Preli2        | 1.084667118 | 5.18990317  | 0.001160389 | 0.003751626 |
| Wbp2          | 1.084630516 | 5.006995909 | 7.34388E-06 | 4.25019E-05 |
| 4930440I19Rik | 1.081155105 | 2.315849398 | 8.9812E-05  | 0.000397331 |
| Fkbp1a        | 1.080534629 | 7.521232277 | 7.72546E-12 | 1.09449E-10 |
| Rab20         | 1.078972122 | 1.823970757 | 8.49579E-05 | 0.00037765  |
| Kremen1       | 1.077297164 | 3.55364366  | 2.46978E-06 | 1.56413E-05 |
| Klhl18        | 1.076069144 | 4.115361662 | 9.60874E-07 | 6.59811E-06 |
| A230072C01Rik | 1.075225539 | 1.889055654 | 0.000244415 | 0.000971643 |
| Sec24d        | 1.073684103 | 6.261084932 | 1.62376E-10 | 1.99478E-09 |
| Fubp1         | 1.072112643 | 9.152410426 | 5.29964E-05 | 0.000246523 |
| Tspyl2        | 1.072097327 | 4.329382607 | 0.000439137 | 0.0016119   |
| Prrc2a        | 1.070720829 | 7.354048938 | 7.49931E-06 | 4.33214E-05 |
| Mdk           | 1.070075977 | 1.180662503 | 0.000284826 | 0.00111007  |
| Dock4         | 1.069288932 | 6.074528485 | 6.5002E-10  | 7.42801E-09 |
| Adgrl2        | 1.068271363 | 3.631849371 | 1.62019E-06 | 1.06717E-05 |
| Ghdc          | 1.067474331 | 2.734854844 | 4.03977E-06 | 2.44302E-05 |
| Dcun1d3       | 1.065640594 | 4.499768998 | 4.25145E-09 | 4.30944E-08 |
| Ppig          | 1.065478848 | 8.271381072 | 0.000206417 | 0.00083623  |
| Tapbp1        | 1.065023986 | 2.890008588 | 9.60161E-07 | 6.59695E-06 |
| Vmp1          | 1.063436696 | 7.237213177 | 2.0552E-11  | 2.79401E-10 |
| Sec23ip       | 1.05873653  | 6.936462022 | 1.29283E-08 | 1.21868E-07 |

|               |             |             |             |             |
|---------------|-------------|-------------|-------------|-------------|
| Camk2d        | 1.055978072 | 5.851122219 | 8.95778E-12 | 1.26023E-10 |
| Ell           | 1.055920706 | 4.482395906 | 2.25345E-05 | 0.0001166   |
| Meis3         | 1.055917486 | 2.375218277 | 4.95923E-06 | 2.9548E-05  |
| Dnm2          | 1.055512401 | 7.257961717 | 2.47653E-09 | 2.59276E-08 |
| 1810055G02Rik | 1.052550841 | 6.183328967 | 0.003223678 | 0.009043634 |
| Myo7a         | 1.052219072 | 7.402655451 | 3.31036E-07 | 2.47368E-06 |
| Snap23        | 1.051791591 | 5.817681898 | 3.06175E-08 | 2.68551E-07 |
| Chd9          | 1.051653371 | 6.950474615 | 1.99175E-09 | 2.12191E-08 |
| Orai1         | 1.05081689  | 4.417476074 | 1.37322E-06 | 9.14951E-06 |
| Lnpep         | 1.050014546 | 7.969018215 | 5.98598E-10 | 6.87281E-09 |
| Pbxip1        | 1.049798012 | 5.572206572 | 4.54234E-11 | 5.97409E-10 |
| Atf7          | 1.048706558 | 4.690788945 | 3.5707E-08  | 3.09163E-07 |
| Pcgf3         | 1.04837251  | 6.353274257 | 3.68468E-08 | 3.18122E-07 |
| 4921531C22Rik | 1.047123731 | 1.901960524 | 0.000486235 | 0.001760239 |
| Fam114a1      | 1.044345006 | 3.035135975 | 1.37569E-05 | 7.48735E-05 |
| Acsl4         | 1.043913838 | 8.508940504 | 7.83906E-10 | 8.86596E-09 |
| Fam161b       | 1.043665283 | 1.7448729   | 0.000705915 | 0.002437588 |
| Fam50a        | 1.042995548 | 6.319285971 | 0.000435736 | 0.001601355 |
| Lysmd3        | 1.042484467 | 5.885795482 | 1.71232E-07 | 1.34161E-06 |
| Rnf214        | 1.040800003 | 5.247287733 | 3.18391E-07 | 2.39272E-06 |
| Papd7         | 1.040484923 | 6.288246262 | 2.66693E-09 | 2.78488E-08 |
| Foxn3         | 1.035313322 | 4.93563388  | 1.51184E-08 | 1.41086E-07 |
| Setdb2        | 1.034547599 | 5.58668988  | 1.83643E-10 | 2.24241E-09 |
| Eid3          | 1.033452418 | 2.143329077 | 5.09541E-05 | 0.000237936 |
| Bmpr2         | 1.031175105 | 6.976409346 | 1.19069E-08 | 1.12854E-07 |
| Slc9a1        | 1.030520441 | 2.866860132 | 1.35029E-05 | 7.37758E-05 |
| Dhrs3         | 1.029822632 | 5.111268362 | 3.26738E-09 | 3.35974E-08 |
| Ets2          | 1.029329787 | 6.801228131 | 2.18359E-09 | 2.31003E-08 |
| Gsk3b         | 1.027818495 | 6.40609782  | 1.89589E-09 | 2.03409E-08 |
| Tbrg1         | 1.02645947  | 8.132654493 | 4.99025E-10 | 5.79548E-09 |
| Atp2b1        | 1.02644044  | 9.054212543 | 1.333E-05   | 7.29983E-05 |
| Cblb          | 1.025717316 | 3.174765888 | 5.14877E-06 | 3.05871E-05 |
| Pabpc1        | 1.024885562 | 9.85136071  | 1.51234E-05 | 8.15625E-05 |
| Gfod1         | 1.023997233 | 5.406445589 | 2.72554E-09 | 2.84363E-08 |
| Ncoa7         | 1.023691498 | 6.366937963 | 2.00078E-07 | 1.54859E-06 |
| Eaf1          | 1.02106489  | 6.883788092 | 6.54853E-10 | 7.46915E-09 |
| D330045A20Rik | 1.020707038 | 6.053570121 | 1.12102E-08 | 1.06752E-07 |
| Cbwd1         | 1.020332687 | 5.990937433 | 4.39722E-08 | 3.76155E-07 |
| Rnasel        | 1.01973003  | 4.446836759 | 2.87203E-06 | 1.7914E-05  |
| Ranbp10       | 1.019313088 | 5.024722936 | 6.14949E-09 | 6.11065E-08 |
| Cenpj         | 1.018974472 | 4.942966692 | 1.21706E-06 | 8.19467E-06 |
| Pdcd6ip       | 1.018663595 | 8.183145159 | 3.93617E-07 | 2.89138E-06 |
| Pi4k2b        | 1.018468339 | 5.876245866 | 9.04129E-11 | 1.15039E-09 |
| Gm1821        | 1.017869173 | 6.281009325 | 0.001335584 | 0.004238389 |
| Stx6          | 1.017134035 | 6.248908069 | 1.61218E-09 | 1.753E-08   |

|          |              |             |             |             |
|----------|--------------|-------------|-------------|-------------|
| Cdk12    | 1.016194753  | 7.478615747 | 5.75814E-07 | 4.08841E-06 |
| Tmem154  | 1.01512347   | 3.699264613 | 5.63637E-07 | 4.009E-06   |
| Neb      | 1.014529288  | 1.083711235 | 0.003374354 | 0.009411362 |
| BlvrB    | 1.014015012  | 6.845349735 | 2.95932E-08 | 2.6089E-07  |
| Hnrnpul2 | 1.013477225  | 7.5870245   | 1.41131E-08 | 1.32111E-07 |
| Ocr1     | 1.013189347  | 5.759134147 | 3.01185E-09 | 3.11019E-08 |
| Cd300ld  | 1.012504918  | 6.018322666 | 2.37875E-06 | 1.51333E-05 |
| Natd1    | 1.012137811  | 1.532001375 | 0.000511862 | 0.001839527 |
| Mark2    | 1.011608175  | 5.925145859 | 9.22146E-08 | 7.53708E-07 |
| Gatad2b  | 1.008674135  | 4.707650014 | 0.000117949 | 0.000508983 |
| F11r     | 1.00703536   | 1.893286929 | 0.000147246 | 0.000621027 |
| Cherp    | 1.003963773  | 5.164401934 | 3.22802E-07 | 2.42081E-06 |
| Impact   | 1.003811501  | 6.195883533 | 2.51564E-08 | 2.24719E-07 |
| Ankrd17  | 1.002491057  | 8.332697104 | 2.5088E-07  | 1.91535E-06 |
| Map7d1   | 1.002028949  | 6.784308819 | 0.000422995 | 0.001563362 |
| Ascc3    | 1.001987104  | 8.355340892 | 1.06337E-08 | 1.01662E-07 |
| Atg13    | 1.001014907  | 4.458190132 | 5.71604E-05 | 0.000263866 |
| Stxbp3   | 1.000852272  | 6.065159098 | 1.51529E-06 | 1.00409E-05 |
| Nthl1    | -1.000077383 | 2.814889573 | 2.00824E-05 | 0.000105215 |
| Fam107b  | -1.00022592  | 5.702437987 | 9.10969E-08 | 7.45075E-07 |
| Mis18a   | -1.000783403 | 4.725975582 | 1.55805E-06 | 1.02849E-05 |
| Smim4    | -1.002909639 | 2.71792526  | 0.001631954 | 0.005044108 |
| Rpl36    | -1.002918416 | 4.233777233 | 5.33115E-05 | 0.000247703 |
| Tmem70   | -1.00346802  | 5.83804641  | 3.38617E-06 | 2.08418E-05 |
| Capg     | -1.003498416 | 9.136563588 | 0.000103448 | 0.000453518 |
| Tnni2    | -1.006228632 | 5.285663094 | 3.71133E-09 | 3.7969E-08  |
| Rsad1    | -1.007917059 | 2.28423115  | 9.1915E-05  | 0.000406042 |
| Atp5k    | -1.008757922 | 5.08126903  | 8.5077E-05  | 0.000377902 |
| Ethe1    | -1.009284878 | 3.584051088 | 5.94329E-06 | 3.51005E-05 |
| Stard7   | -1.009603519 | 7.198395665 | 0.000273831 | 0.001070649 |
| Tmem144  | -1.009923605 | 4.803570091 | 2.92643E-09 | 3.02973E-08 |
| Ascc1    | -1.013232089 | 4.345968665 | 8.19758E-08 | 6.75492E-07 |
| Sdhd     | -1.01344722  | 7.289586437 | 1.57104E-06 | 1.03649E-05 |
| Smad3    | -1.013901933 | 3.721553055 | 6.80043E-06 | 3.96218E-05 |
| Nrros    | -1.014177663 | 6.714204522 | 2.57352E-05 | 0.000130759 |
| Capn5    | -1.015038184 | 4.39625963  | 3.00993E-05 | 0.000149669 |
| Cops7b   | -1.015090619 | 4.33884533  | 0.001428537 | 0.004480545 |
| Naca     | -1.015109985 | 4.993370854 | 4.20849E-05 | 0.000200857 |
| Pstk     | -1.015348433 | 3.28408048  | 0.000225774 | 0.000906762 |
| Tmem186  | -1.016420684 | 4.669741392 | 1.82729E-08 | 1.67555E-07 |
| Atp6v0d2 | -1.016580941 | 4.196771696 | 6.50091E-05 | 0.00029637  |
| Tmem59   | -1.017259746 | 6.413836768 | 0.000148842 | 0.000625797 |
| Irak1bp1 | -1.017511597 | 3.274852728 | 3.34897E-06 | 2.06548E-05 |
| Guca1a   | -1.01840295  | 3.568021614 | 0.000141898 | 0.000601192 |
| Ybey     | -1.018634934 | 2.43751862  | 0.000533488 | 0.001905673 |

|               |              |             |             |             |
|---------------|--------------|-------------|-------------|-------------|
| Txn1          | -1.019224146 | 7.966767432 | 0.000149027 | 0.000626359 |
| Osgep         | -1.019341134 | 4.216636691 | 1.61217E-06 | 1.06247E-05 |
| Rab40c        | -1.019526491 | 3.907431188 | 0.001100828 | 0.003583533 |
| Plekho1       | -1.020409017 | 5.98635786  | 1.46675E-09 | 1.60427E-08 |
| Use1          | -1.021676475 | 5.222676584 | 3.13053E-05 | 0.00015465  |
| 1500015A07Rik | -1.021885569 | 1.674086941 | 0.000155355 | 0.000651146 |
| Enc1          | -1.023212479 | 4.550336783 | 5.27167E-08 | 4.45609E-07 |
| Sirt5         | -1.023445306 | 2.58655721  | 8.50157E-06 | 4.86211E-05 |
| 2310009B15Rik | -1.024531086 | 2.957385941 | 0.000748381 | 0.002569483 |
| Tom20         | -1.024670552 | 5.692625409 | 1.25046E-06 | 8.4009E-06  |
| E130317F20Rik | -1.025103443 | 2.045518205 | 0.001735874 | 0.005315128 |
| 2610001J05Rik | -1.026071223 | 5.613444993 | 4.45492E-05 | 0.000211369 |
| Rps12         | -1.027086536 | 3.733017814 | 2.30126E-05 | 0.000118618 |
| Efemp2        | -1.029136763 | 1.773424124 | 8.03926E-05 | 0.000359091 |
| Hadh          | -1.030415503 | 5.634428718 | 1.03925E-09 | 1.15596E-08 |
| Oip5          | -1.033067093 | 4.264610627 | 1.06828E-07 | 8.62095E-07 |
| Man2a2        | -1.033075742 | 5.930808015 | 1.24603E-10 | 1.5512E-09  |
| Ada           | -1.035292628 | 4.024971405 | 1.2519E-07  | 9.98967E-07 |
| Sars2         | -1.0354541   | 3.703521665 | 7.29545E-06 | 4.2262E-05  |
| Snord49a      | -1.036343958 | 1.394825401 | 0.002457713 | 0.007150866 |
| Nlrc3         | -1.038886193 | 2.074156554 | 5.27191E-05 | 0.000245327 |
| Ankrd55       | -1.039267953 | 1.998311907 | 3.14053E-05 | 0.000155081 |
| Clstn3        | -1.04071519  | 2.112117792 | 0.001176124 | 0.003794991 |
| Slc43a2       | -1.040776488 | 6.758088641 | 1.69876E-08 | 1.56838E-07 |
| Tyms-ps       | -1.041082355 | 3.795871432 | 3.39298E-06 | 2.08731E-05 |
| Alg6          | -1.041640046 | 5.14130942  | 6.88727E-08 | 5.7416E-07  |
| Gbas          | -1.042521819 | 5.475986547 | 6.05224E-08 | 5.06639E-07 |
| Rnaseh2b      | -1.042807566 | 5.636340679 | 7.5575E-09  | 7.40048E-08 |
| Zfp932        | -1.045972936 | 3.657789773 | 4.15289E-05 | 0.000198673 |
| Cmss1         | -1.046342624 | 4.532780425 | 1.48906E-08 | 1.39067E-07 |
| Dph7          | -1.046512173 | 3.874402151 | 1.97626E-05 | 0.000103899 |
| Ccdc85b       | -1.046690108 | 3.521183973 | 0.002841696 | 0.008100872 |
| Dsn1          | -1.047074237 | 4.870415647 | 5.31607E-08 | 4.49048E-07 |
| Rftn1         | -1.048435886 | 5.221083975 | 1.40986E-06 | 9.38849E-06 |
| Tpgs1         | -1.048567903 | 3.519416798 | 0.000400566 | 0.001491105 |
| Commd4        | -1.048823308 | 4.351875904 | 0.002435878 | 0.007097857 |
| Fuom          | -1.050316271 | 2.497081748 | 0.000129072 | 0.000552455 |
| Coq7          | -1.050506187 | 4.772356267 | 7.01977E-10 | 7.97659E-09 |
| Dfna5         | -1.050694828 | 2.008743989 | 0.00020081  | 0.000817341 |
| Sdhd          | -1.053428354 | 7.180704434 | 8.53045E-09 | 8.2796E-08  |
| Gpr155        | -1.054730918 | 3.315203811 | 4.12124E-06 | 2.49105E-05 |
| Dyrk3         | -1.055874429 | 5.328378258 | 8.56938E-08 | 7.04691E-07 |
| Cdk4          | -1.057293779 | 8.013631055 | 1.2187E-07  | 9.744E-07   |
| Melk          | -1.057448591 | 6.341364547 | 1.16716E-11 | 1.62691E-10 |
| Xrcc6bp1      | -1.058040046 | 3.711830441 | 3.22961E-07 | 2.42081E-06 |

|               |              |             |             |             |
|---------------|--------------|-------------|-------------|-------------|
| Fundc2        | -1.058951836 | 5.36017235  | 2.17789E-06 | 1.39803E-05 |
| E330020D12Rik | -1.059081571 | 2.964804396 | 4.75054E-05 | 0.000224253 |
| Agpat2        | -1.059163003 | 4.838833933 | 3.06878E-07 | 2.31314E-06 |
| Maf1          | -1.05940762  | 4.835368979 | 3.37627E-05 | 0.000165775 |
| 2010111I01Rik | -1.062356045 | 5.466931782 | 4.46897E-08 | 3.81753E-07 |
| Fancc         | -1.062458789 | 3.430669821 | 1.55534E-05 | 8.3621E-05  |
| Snrpd2        | -1.062892288 | 5.369272618 | 5.73543E-05 | 0.000264559 |
| Tmem60        | -1.062998579 | 3.273319978 | 0.002094645 | 0.006238613 |
| Ndufc2        | -1.063176274 | 5.786632467 | 1.51336E-05 | 8.15816E-05 |
| Ubl4a         | -1.063950999 | 3.716150902 | 2.03679E-06 | 1.31582E-05 |
| Tacc3         | -1.063952883 | 7.391594498 | 3.58918E-10 | 4.22916E-09 |
| Haus4         | -1.065224325 | 4.680127635 | 1.48164E-08 | 1.38481E-07 |
| Cep55         | -1.065278242 | 7.007458583 | 2.78171E-09 | 2.89226E-08 |
| Rxra          | -1.065427543 | 3.038230921 | 1.04322E-05 | 5.85024E-05 |
| Esco2         | -1.065973001 | 6.419401379 | 3.84129E-08 | 3.30466E-07 |
| Fbxo31        | -1.066227736 | 3.927038059 | 1.11799E-06 | 7.59516E-06 |
| Dmpk          | -1.066635875 | 5.596455632 | 7.28153E-08 | 6.04947E-07 |
| Tbc1d8        | -1.06875246  | 3.618452572 | 8.16883E-07 | 5.67694E-06 |
| Hsd17b10      | -1.069413341 | 5.951933349 | 4.8048E-11  | 6.28515E-10 |
| Zfp383        | -1.069728958 | 1.796945632 | 0.002628593 | 0.007591831 |
| Ncapg         | -1.069840172 | 7.574859597 | 5.51987E-11 | 7.15869E-10 |
| Acat3         | -1.070524312 | 1.217788957 | 0.003623977 | 0.009994817 |
| Tbc1d14       | -1.070608042 | 5.901710842 | 0.001772149 | 0.005400261 |
| Tmeff1        | -1.071214411 | 1.110596595 | 0.000179356 | 0.000738708 |
| Abhd8         | -1.072066444 | 3.428643548 | 0.000527296 | 0.001887452 |
| S100a6        | -1.072308009 | 7.830694741 | 7.03188E-09 | 6.91934E-08 |
| Chmp1a        | -1.072693869 | 4.987329616 | 0.002123396 | 0.006305637 |
| Cbx8          | -1.074327053 | 3.382381049 | 1.01055E-06 | 6.90401E-06 |
| Gtse1         | -1.074504151 | 4.928319167 | 6.53762E-09 | 6.47507E-08 |
| N4bp3         | -1.074695836 | 2.56723753  | 0.0001133   | 0.000491372 |
| Ccdc142       | -1.075097016 | 2.952852123 | 3.83275E-06 | 2.32351E-05 |
| Slc25a39      | -1.075309955 | 6.395703128 | 1.47203E-05 | 7.9637E-05  |
| Sorl1         | -1.075896608 | 3.993933878 | 2.53062E-06 | 1.5982E-05  |
| Eci1          | -1.076070519 | 4.552980408 | 5.49512E-05 | 0.000254638 |
| Zfp759        | -1.076132538 | 3.597378223 | 3.2469E-07  | 2.43226E-06 |
| Rps17         | -1.07613537  | 5.65615393  | 3.57685E-06 | 2.18379E-05 |
| Mrm1          | -1.076596897 | 3.30054731  | 0.000107087 | 0.000467607 |
| Nit2          | -1.077884793 | 4.917870872 | 1.9507E-06  | 1.26492E-05 |
| Mat2b         | -1.078083566 | 5.589086543 | 4.15548E-05 | 0.000198718 |
| Gtf2ird2      | -1.078172242 | 3.684458535 | 2.69209E-07 | 2.05219E-06 |
| Gm14305       | -1.078999678 | 2.737067929 | 0.000144905 | 0.000612005 |
| Adap1         | -1.080320678 | 6.360006245 | 9.90908E-07 | 6.78128E-06 |
| 2010012O05Rik | -1.080563789 | 2.648453252 | 0.000291386 | 0.001131268 |
| Bub1          | -1.081982743 | 7.809057381 | 5.3904E-11  | 6.99827E-10 |
| Nt5dc2        | -1.086339948 | 4.849849032 | 6.45433E-10 | 7.38954E-09 |



|               |              |             |             |             |
|---------------|--------------|-------------|-------------|-------------|
| Sgol1         | -1.08651599  | 6.229967023 | 4.11681E-08 | 3.53165E-07 |
| Hist1h1a      | -1.087058888 | 8.455631588 | 6.17267E-10 | 7.07375E-09 |
| Fkbp11        | -1.087593893 | 3.688616858 | 3.48188E-07 | 2.58908E-06 |
| Paqr7         | -1.08850392  | 4.300793896 | 8.16675E-07 | 5.67694E-06 |
| Mcat          | -1.089395731 | 3.626049952 | 0.001348079 | 0.004269767 |
| Pdgfa         | -1.089424178 | 4.446314643 | 2.57313E-05 | 0.000130759 |
| 2310039H08Rik | -1.091547524 | 3.468923044 | 2.94454E-06 | 1.83097E-05 |
| Lsm8          | -1.091933915 | 5.272854608 | 0.000138716 | 0.000589155 |
| Commd1        | -1.09207891  | 5.582042515 | 9.43453E-08 | 7.6853E-07  |
| Rhebl1        | -1.092110132 | 1.991296354 | 0.000865133 | 0.002902064 |
| Eid2b         | -1.092215563 | 2.273070786 | 4.25504E-05 | 0.000202759 |
| Hist1h1e      | -1.093713167 | 8.181925079 | 3.38615E-06 | 2.08418E-05 |
| Mutyh         | -1.095380624 | 2.436945987 | 2.94619E-05 | 0.000146861 |
| Car5b         | -1.095835542 | 5.300994402 | 3.03098E-11 | 4.05682E-10 |
| Tufm          | -1.096480921 | 3.326560965 | 0.002244097 | 0.006613808 |
| Scarna13      | -1.096851439 | 6.32569151  | 8.44318E-07 | 5.85416E-06 |
| Plekhg5       | -1.097399528 | 2.679449388 | 3.78794E-06 | 2.30223E-05 |
| Csf1r         | -1.102328131 | 9.689243    | 2.44169E-08 | 2.18758E-07 |
| Rnf144b       | -1.102436966 | 2.672975294 | 3.14401E-06 | 1.94601E-05 |
| Ndufa7        | -1.102630994 | 5.208309972 | 0.000550745 | 0.001959804 |
| Ndufa4        | -1.102977236 | 6.544889698 | 7.70025E-05 | 0.000345968 |
| Homer3        | -1.103463531 | 2.103595902 | 0.000351266 | 0.001332447 |
| Birc5         | -1.103926682 | 7.242764667 | 2.72879E-08 | 2.4233E-07  |
| Mrps11        | -1.104067616 | 4.067263711 | 0.000524384 | 0.001880363 |
| Rpusd4        | -1.104595023 | 5.272254042 | 2.12056E-07 | 1.63191E-06 |
| Fxn           | -1.105057239 | 3.771418475 | 1.35147E-07 | 1.07346E-06 |
| Rsrp1         | -1.105224107 | 6.205612887 | 2.2599E-05  | 0.000116884 |
| Hmbs          | -1.105317795 | 5.230930326 | 1.0269E-05  | 5.76672E-05 |
| Galt          | -1.105472631 | 2.832558277 | 1.38223E-05 | 7.51819E-05 |
| Cerk          | -1.105625495 | 6.071780205 | 1.54518E-07 | 1.21695E-06 |
| Aurka         | -1.106863807 | 7.172299593 | 8.22434E-11 | 1.04865E-09 |
| Sort1         | -1.107094003 | 5.144160314 | 4.10332E-11 | 5.42615E-10 |
| Rgs10         | -1.107478852 | 6.694076798 | 1.9122E-12  | 2.85603E-11 |
| Mrps26        | -1.108178354 | 6.280010074 | 5.63065E-07 | 4.00729E-06 |
| Slc29a1       | -1.10857391  | 6.478683943 | 1.70073E-12 | 2.56869E-11 |
| Hmgb1         | -1.10897216  | 5.315162888 | 1.14263E-10 | 1.43426E-09 |
| Lrrc75a       | -1.109453543 | 5.504419994 | 1.35662E-09 | 1.49117E-08 |
| Gins3         | -1.109986291 | 5.391458917 | 2.83642E-11 | 3.80482E-10 |
| Kif18b        | -1.110101555 | 5.266534866 | 4.58952E-08 | 3.91224E-07 |
| Sgol2a        | -1.112729699 | 7.599401404 | 9.46741E-07 | 6.51214E-06 |
| Mastl         | -1.113630534 | 5.350796247 | 3.22346E-11 | 4.3002E-10  |
| Bbc3          | -1.113935082 | 2.035482531 | 0.000666204 | 0.002320221 |
| Cox7a2        | -1.114397609 | 6.772445842 | 1.70125E-06 | 1.11632E-05 |
| Mettl17       | -1.11605772  | 3.822572034 | 3.91024E-05 | 0.000188704 |
| Gemin6        | -1.116256391 | 4.821346843 | 2.7161E-07  | 2.06919E-06 |

|               |              |             |             |             |
|---------------|--------------|-------------|-------------|-------------|
| Glr5          | -1.117218279 | 5.486609205 | 1.03848E-05 | 5.82636E-05 |
| Cryz          | -1.117842985 | 4.091009547 | 2.90135E-06 | 1.80782E-05 |
| Prss50        | -1.118700452 | 4.024934067 | 4.8087E-05  | 0.000226205 |
| Fam19a3       | -1.121342549 | 2.273353034 | 6.75919E-06 | 3.94194E-05 |
| Lsr           | -1.12217349  | 1.677698577 | 1.88791E-05 | 9.96436E-05 |
| Gnb1l         | -1.122497791 | 3.104835606 | 0.000375524 | 0.00141177  |
| Lnx1          | -1.122568965 | 2.116126805 | 4.78703E-05 | 0.000225536 |
| Itga6         | -1.122981824 | 4.22506828  | 1.23288E-08 | 1.16671E-07 |
| Zfp472        | -1.123770024 | 4.561455645 | 9.31667E-08 | 7.60464E-07 |
| Hist4h4       | -1.126091419 | 8.70866521  | 2.04933E-09 | 2.17941E-08 |
| Uevld         | -1.126096984 | 4.756241438 | 5.33139E-11 | 6.92909E-10 |
| Rfc5          | -1.126154456 | 6.013068858 | 9.69279E-10 | 1.08311E-08 |
| 1190002F15Rik | -1.127591    | 2.099437538 | 1.5743E-05  | 8.44902E-05 |
| Fam129c       | -1.128241654 | 1.878398984 | 0.000229096 | 0.000918281 |
| Snx21         | -1.129025307 | 2.126749873 | 0.000271961 | 0.001065759 |
| Ormdl2        | -1.129679948 | 3.312101045 | 0.000510151 | 0.001834211 |
| Ndufb5        | -1.129792132 | 5.719841202 | 8.73573E-09 | 8.45851E-08 |
| Fancl         | -1.130517708 | 4.382468212 | 1.30311E-07 | 1.03777E-06 |
| Fut4          | -1.131811192 | 1.095049609 | 0.002946885 | 0.008367469 |
| Lage3         | -1.13272196  | 4.384612901 | 2.43482E-08 | 2.18304E-07 |
| Lancl1        | -1.132825928 | 4.960698927 | 4.95776E-08 | 4.19954E-07 |
| Sgk1          | -1.133179936 | 3.450909261 | 5.72469E-08 | 4.80882E-07 |
| Hist1h2bc     | -1.133456635 | 6.174957864 | 0.000774209 | 0.002644669 |
| Spc24         | -1.134779933 | 5.647972332 | 3.4617E-11  | 4.6028E-10  |
| Fignl1        | -1.135418236 | 6.454606288 | 2.46043E-12 | 3.63454E-11 |
| Fhod1         | -1.135917987 | 2.882755202 | 2.31103E-05 | 0.000118942 |
| 0610011F06Rik | -1.136551721 | 3.227104809 | 5.45859E-06 | 3.23009E-05 |
| Zfp606        | -1.137147032 | 3.900863893 | 4.59417E-08 | 3.91345E-07 |
| Cacna1s       | -1.138153161 | 1.434116248 | 0.00036696  | 0.001384731 |
| Rxrb          | -1.138461076 | 5.345476085 | 1.84999E-06 | 1.20543E-05 |
| Gpr19         | -1.140534515 | 1.706787569 | 5.18631E-05 | 0.000241715 |
| Arl6ip1       | -1.140741156 | 7.83495676  | 2.40502E-09 | 2.52007E-08 |
| Bambi         | -1.141275986 | 1.498714381 | 1.06213E-05 | 5.94617E-05 |
| Prss12        | -1.141777973 | 2.739503218 | 3.51216E-05 | 0.000171474 |
| Klhdc9        | -1.142134547 | 1.964289222 | 1.72245E-05 | 9.16698E-05 |
| Prc1          | -1.142784197 | 7.919036103 | 1.08294E-08 | 1.0337E-07  |
| Megf9         | -1.143206204 | 5.615147097 | 3.21834E-07 | 2.41535E-06 |
| Wbscr16       | -1.144235393 | 4.568946225 | 8.1688E-05  | 0.000364318 |
| Ccdc106       | -1.144324843 | 3.165802107 | 3.38056E-05 | 0.000165919 |
| Rcc2          | -1.145009671 | 8.577183641 | 8.66241E-09 | 8.39422E-08 |
| Kptn          | -1.14526854  | 3.079590735 | 0.000289142 | 0.001123635 |
| Zfp385a       | -1.145837566 | 1.542654642 | 0.000424222 | 0.001566647 |
| Cc2d2a        | -1.14680928  | 2.969300184 | 9.27321E-06 | 5.25872E-05 |
| Ulk4          | -1.147184227 | 1.896546297 | 1.57066E-05 | 8.43701E-05 |
| Dars2         | -1.147310716 | 6.728026895 | 1.43498E-13 | 2.42088E-12 |

|               |              |             |             |             |
|---------------|--------------|-------------|-------------|-------------|
| Vmac          | -1.147499503 | 1.56027762  | 7.53863E-06 | 4.35043E-05 |
| Stx2          | -1.147909382 | 5.12399589  | 7.63911E-11 | 9.77113E-10 |
| Eri3          | -1.148180589 | 5.097193825 | 9.38869E-07 | 6.46533E-06 |
| Coa6          | -1.148764508 | 2.733864878 | 0.000142748 | 0.000604158 |
| Aars2         | -1.149319792 | 3.863909814 | 6.13589E-06 | 3.61498E-05 |
| Hyi           | -1.150374374 | 2.878550038 | 3.08979E-05 | 0.000153011 |
| Psmg4         | -1.150593775 | 4.028372725 | 0.000798771 | 0.002713268 |
| Pafah1b3      | -1.150749577 | 3.4461898   | 4.06959E-05 | 0.000195305 |
| Colec12       | -1.151331381 | 9.203933426 | 5.95128E-10 | 6.83945E-09 |
| Polr1c        | -1.152426226 | 5.267497726 | 1.47529E-05 | 7.97777E-05 |
| Steap3        | -1.152454691 | 4.496860534 | 9.13642E-09 | 8.83236E-08 |
| Fam69b        | -1.152687003 | 2.329699053 | 6.80822E-05 | 0.000309332 |
| Snhg20        | -1.153745937 | 2.686026694 | 0.00037803  | 0.001419427 |
| Nlrp10        | -1.153979113 | 4.896621428 | 1.64157E-10 | 2.01462E-09 |
| Slc25a45      | -1.154247144 | 4.834285965 | 8.07634E-10 | 9.10882E-09 |
| Lrrc14        | -1.154631878 | 4.06937621  | 3.96104E-05 | 0.000190835 |
| Slc26a6       | -1.155529657 | 2.344318506 | 0.000330201 | 0.001263337 |
| Slc44a1       | -1.157257346 | 6.857311853 | 2.26768E-13 | 3.73212E-12 |
| Snord96a      | -1.158184505 | 2.11503718  | 0.00199694  | 0.005984398 |
| Dcaf15        | -1.15927983  | 3.903567526 | 0.000180138 | 0.000741677 |
| Elp6          | -1.16021034  | 3.758414198 | 4.36153E-08 | 3.73366E-07 |
| Tagap1        | -1.160240548 | 3.3882299   | 6.55148E-06 | 3.83372E-05 |
| Arhgef6       | -1.16034694  | 8.470662697 | 7.0587E-12  | 1.00591E-10 |
| Jag2          | -1.160357253 | 3.697335136 | 3.7254E-08  | 3.21409E-07 |
| Hnrnpa0       | -1.160558061 | 6.862993839 | 0.000415799 | 0.001539767 |
| Tmem256       | -1.160639856 | 3.680265287 | 0.000156562 | 0.000655071 |
| Pcif1         | -1.160859614 | 4.448621331 | 1.06417E-06 | 7.25807E-06 |
| C330027C09Rik | -1.162955683 | 7.519846453 | 1.1472E-10  | 1.43707E-09 |
| 1810032O08Rik | -1.163244775 | 3.008626227 | 0.002313964 | 0.006785052 |
| Hspbp1        | -1.164506187 | 4.761417729 | 8.09057E-05 | 0.000361228 |
| Kif23         | -1.164767034 | 7.349738032 | 2.05959E-12 | 3.06107E-11 |
| Josd2         | -1.165420796 | 4.003034987 | 0.001285806 | 0.004094367 |
| 6330416G13Rik | -1.166968106 | 4.464623964 | 1.92349E-09 | 2.06005E-08 |
| Mettl20       | -1.167634233 | 1.456683423 | 0.000309722 | 0.001195557 |
| Htra2         | -1.168216772 | 5.350820681 | 1.06782E-07 | 8.62095E-07 |
| Gramd4        | -1.168851709 | 4.932134614 | 3.57406E-07 | 2.65111E-06 |
| Snx29         | -1.169941363 | 2.98176892  | 3.35863E-05 | 0.00016511  |
| Fgd4          | -1.17112062  | 7.712920447 | 2.09995E-08 | 1.90823E-07 |
| Cd276         | -1.17116225  | 3.193606348 | 8.75144E-06 | 4.98618E-05 |
| Snrpb         | -1.172189766 | 7.839204097 | 1.10839E-05 | 6.17567E-05 |
| Wdr4          | -1.173549514 | 5.253685221 | 8.86602E-07 | 6.12281E-06 |
| Slc6a8        | -1.17482652  | 3.836004786 | 5.49588E-08 | 4.6359E-07  |
| Sec61b        | -1.176238305 | 4.707652772 | 0.001584906 | 0.004908709 |
| Tyrobp        | -1.176952555 | 8.191435453 | 9.40235E-09 | 9.06772E-08 |
| Pdcd4         | -1.178487039 | 3.480905825 | 1.0012E-07  | 8.11747E-07 |

|               |              |             |             |             |
|---------------|--------------|-------------|-------------|-------------|
| Mki67         | -1.179210126 | 10.95786701 | 1.86266E-05 | 9.85259E-05 |
| Camk1         | -1.179867757 | 5.765604776 | 1.00461E-13 | 1.72854E-12 |
| Erf           | -1.181360615 | 5.318435561 | 2.49051E-10 | 2.98098E-09 |
| Pars2         | -1.182665682 | 3.035295603 | 0.000101648 | 0.000446273 |
| Zfp931        | -1.182749513 | 3.478846117 | 1.12918E-05 | 6.28282E-05 |
| Atp6v0e       | -1.183039577 | 6.214779415 | 2.10448E-05 | 0.0001095   |
| Tsku          | -1.183307388 | 1.920131191 | 1.28712E-05 | 7.08999E-05 |
| Pkig          | -1.184955281 | 4.788747256 | 8.65596E-08 | 7.10845E-07 |
| Mis18bp1      | -1.185795228 | 7.501824904 | 1.53142E-08 | 1.42693E-07 |
| Samm50        | -1.186734001 | 6.707559172 | 8.54866E-06 | 4.88674E-05 |
| Hist1h4d      | -1.18745786  | 7.709949249 | 1.2283E-07  | 9.81422E-07 |
| D17H6S56E-5   | -1.18877603  | 8.169142076 | 1.88764E-13 | 3.14511E-12 |
| Cd33          | -1.189199099 | 2.536803105 | 1.23091E-05 | 6.79888E-05 |
| Foxm1         | -1.19102892  | 6.081766119 | 2.95218E-09 | 3.05378E-08 |
| Echdc3        | -1.194091693 | 1.064660572 | 0.000490917 | 0.001774007 |
| Prps2         | -1.194829138 | 6.809855396 | 1.65277E-14 | 3.04255E-13 |
| Ttk           | -1.195018926 | 6.363178116 | 1.73473E-13 | 2.90231E-12 |
| Rad9b         | -1.195922213 | 1.179513603 | 0.000359348 | 0.001358972 |
| Nsmce4a       | -1.197849155 | 6.760396473 | 3.65616E-14 | 6.5128E-13  |
| Ptges3l       | -1.198216109 | 1.054957186 | 0.000249958 | 0.000990106 |
| Lipa          | -1.198742349 | 9.348764728 | 9.97942E-10 | 1.11279E-08 |
| Tnfaip8l1     | -1.198815008 | 2.926717444 | 2.8772E-07  | 2.17958E-06 |
| Cd300a        | -1.198957189 | 6.299302386 | 2.04966E-12 | 3.05006E-11 |
| Alkbh7        | -1.199295471 | 2.74456788  | 0.001454497 | 0.004549012 |
| Depdc1a       | -1.201082543 | 4.424400633 | 3.02567E-06 | 1.87564E-05 |
| Ttc32         | -1.202840812 | 4.664246991 | 1.69498E-08 | 1.56608E-07 |
| Rasl2-9       | -1.203196163 | 2.321221815 | 0.000527781 | 0.001888071 |
| Pard6a        | -1.203371417 | 1.632530217 | 0.000415664 | 0.001539737 |
| Tsfm          | -1.204619885 | 4.900659419 | 1.27029E-06 | 8.52936E-06 |
| Ifi2712a      | -1.204829081 | 3.052943183 | 0.000238603 | 0.00095135  |
| Gemin7        | -1.205254844 | 3.94619034  | 0.001408151 | 0.004426205 |
| Kdm8          | -1.206123195 | 2.593842297 | 4.06191E-07 | 2.97113E-06 |
| Nipsnap1      | -1.206460404 | 4.336479087 | 1.47983E-09 | 1.61488E-08 |
| Snx17         | -1.206735577 | 5.76740804  | 4.3084E-06  | 2.59511E-05 |
| Fzr1          | -1.207045208 | 5.54857386  | 4.3891E-06  | 2.63847E-05 |
| Ndufb11       | -1.207786611 | 5.215184018 | 3.128E-05   | 0.00015461  |
| Mycn          | -1.208337371 | 7.686424582 | 3.57389E-07 | 2.65111E-06 |
| Snrpe         | -1.209215846 | 5.614337023 | 8.47763E-06 | 4.85071E-05 |
| Hip1          | -1.209302881 | 6.053087781 | 1.87159E-11 | 2.55587E-10 |
| Lpcat1        | -1.209708573 | 5.980022909 | 2.24345E-13 | 3.69727E-12 |
| Hyls1         | -1.211932207 | 4.544519836 | 1.2084E-10  | 1.50879E-09 |
| Fdxacb1       | -1.21217684  | 2.969375917 | 3.8056E-05  | 0.000184095 |
| Egfl7         | -1.212247806 | 2.682537375 | 6.17579E-06 | 3.63143E-05 |
| Tmsb4x        | -1.212654999 | 9.030265957 | 2.14216E-05 | 0.000111269 |
| 9130008F23Rik | -1.213703577 | 1.750890193 | 0.000108654 | 0.000473088 |

|               |              |             |             |             |
|---------------|--------------|-------------|-------------|-------------|
| Zfp958        | -1.213763324 | 5.499268867 | 3.52517E-13 | 5.64819E-12 |
| Tmem141       | -1.213968039 | 4.130774868 | 1.33408E-07 | 1.06105E-06 |
| Phb           | -1.214751025 | 5.17054458  | 2.56447E-11 | 3.46304E-10 |
| Taldo1        | -1.215388144 | 7.872830784 | 6.98501E-08 | 5.81108E-07 |
| 2810013P06Rik | -1.215898811 | 1.803461006 | 2.07867E-05 | 0.000108436 |
| Atox1         | -1.217569902 | 5.182907476 | 0.000448638 | 0.001641799 |
| Ing4          | -1.218312041 | 4.161999596 | 2.89842E-08 | 2.55893E-07 |
| Aig1          | -1.218369786 | 3.948882706 | 2.80331E-07 | 2.12893E-06 |
| Aif1          | -1.218488542 | 1.51539383  | 3.82736E-06 | 2.32152E-05 |
| Uqcr10        | -1.219057368 | 6.134360897 | 1.06961E-06 | 7.28283E-06 |
| Mgmt          | -1.220410375 | 2.205737051 | 2.15837E-06 | 1.3877E-05  |
| Top2a         | -1.220945038 | 10.29443291 | 2.92473E-09 | 3.02973E-08 |
| Zfp771        | -1.222122147 | 3.128026478 | 0.000839306 | 0.002832217 |
| Kif4          | -1.223088074 | 6.800780333 | 2.92474E-15 | 5.8461E-14  |
| Slc39a3       | -1.223097315 | 2.987218002 | 0.000542596 | 0.001935356 |
| Slc6a12       | -1.223432392 | 6.548233849 | 1.94389E-13 | 3.22996E-12 |
| Kank3         | -1.223640654 | 2.14171685  | 7.89549E-07 | 5.50593E-06 |
| Lzts2         | -1.224124995 | 3.916500043 | 2.14264E-07 | 1.64666E-06 |
| Med22         | -1.22536718  | 5.489563111 | 7.37516E-07 | 5.15793E-06 |
| Gstm1         | -1.226900165 | 1.871984228 | 1.79711E-06 | 1.1735E-05  |
| Crebzf        | -1.227763002 | 5.871918658 | 6.97222E-10 | 7.93745E-09 |
| Suv39h1       | -1.229507355 | 5.837582897 | 2.16968E-09 | 2.29732E-08 |
| Arl10         | -1.229690672 | 2.030574243 | 0.000763918 | 0.002614676 |
| Slc25a15      | -1.230372602 | 4.455594582 | 1.05125E-07 | 8.5005E-07  |
| Sulf2         | -1.231605876 | 3.608753355 | 1.04713E-05 | 5.86945E-05 |
| Med28         | -1.231867259 | 5.367736771 | 0.000578746 | 0.002050409 |
| Cacna1f       | -1.23257622  | 1.400217433 | 2.68597E-05 | 0.000135733 |
| Cars2         | -1.232606829 | 4.515348872 | 3.98095E-07 | 2.92031E-06 |
| Tcam1         | -1.232638997 | 1.184410683 | 7.83166E-05 | 0.000351222 |
| Dnase2a       | -1.233319847 | 5.51770841  | 6.4583E-12  | 9.23606E-11 |
| Saal1         | -1.233498345 | 4.962543996 | 2.00149E-08 | 1.82423E-07 |
| 2700099C18Rik | -1.233897934 | 3.257325105 | 8.50914E-07 | 5.89315E-06 |
| Erp29         | -1.234533123 | 8.306902477 | 7.96506E-14 | 1.38622E-12 |
| Rps28         | -1.234712274 | 2.110980204 | 0.000220329 | 0.000887543 |
| Ddx39         | -1.236622069 | 7.497321857 | 8.04411E-08 | 6.63297E-07 |
| Serinc3       | -1.236896483 | 8.756302929 | 8.04602E-13 | 1.24472E-11 |
| 2410015M20Rik | -1.237497946 | 5.431652936 | 3.75919E-06 | 2.28589E-05 |
| Zfp709        | -1.239109459 | 2.849007568 | 4.24222E-07 | 3.09554E-06 |
| Pck2          | -1.240422019 | 4.353029528 | 2.81959E-08 | 2.49844E-07 |
| Selm          | -1.242006697 | 2.86608734  | 3.48124E-06 | 2.1351E-05  |
| Etohi1        | -1.242286574 | 6.11656972  | 3.7495E-07  | 2.76432E-06 |
| Kctd2         | -1.243682831 | 2.949987808 | 1.28324E-06 | 8.60202E-06 |
| Dtymk         | -1.24452353  | 6.689263638 | 2.36979E-08 | 2.12948E-07 |
| Lamtor4       | -1.24479755  | 3.924476694 | 2.96792E-05 | 0.000147822 |
| Cox8a         | -1.245210424 | 6.75898883  | 1.24391E-05 | 6.86446E-05 |

|               |              |             |             |             |
|---------------|--------------|-------------|-------------|-------------|
| Ephx1         | -1.246281617 | 2.763177692 | 1.093E-06   | 7.4379E-06  |
| 4930432K21Rik | -1.246409145 | 3.788564887 | 8.04701E-10 | 9.08419E-09 |
| Arl4c         | -1.246624168 | 3.383262611 | 2.41023E-08 | 2.16421E-07 |
| Itgb7         | -1.246937739 | 4.665128032 | 3.04366E-08 | 2.67158E-07 |
| Sirt3         | -1.247817836 | 2.27091143  | 2.66475E-05 | 0.000134773 |
| Ten1          | -1.249372698 | 4.026466215 | 1.7623E-06  | 1.15388E-05 |
| Emp3          | -1.24954669  | 7.064226384 | 3.30218E-09 | 3.39264E-08 |
| Gm11974       | -1.25006822  | 3.690947145 | 0.000148455 | 0.000624387 |
| Rnf167        | -1.250088661 | 4.317026186 | 6.83118E-10 | 7.78421E-09 |
| Rdh10         | -1.250807617 | 4.461165805 | 2.6902E-11  | 3.62474E-10 |
| Naaa          | -1.252114989 | 4.711588711 | 2.18109E-12 | 3.22977E-11 |
| Abcb8         | -1.254491025 | 4.929050555 | 5.78012E-07 | 4.09921E-06 |
| Glod4         | -1.255784121 | 5.633022531 | 2.02711E-11 | 2.75892E-10 |
| Snora33       | -1.255963465 | 1.340528439 | 0.000858719 | 0.002882147 |
| Chchd10       | -1.256861825 | 3.281677005 | 1.8479E-08  | 1.69317E-07 |
| Gmnn          | -1.257298897 | 6.260181562 | 7.12157E-11 | 9.12842E-10 |
| Stard3nl      | -1.259038442 | 4.514193443 | 0.001052399 | 0.003451439 |
| Nek2          | -1.259854292 | 6.81002036  | 9.82407E-17 | 2.15578E-15 |
| Sfxn5         | -1.260679582 | 3.592254732 | 4.04885E-10 | 4.74769E-09 |
| Tmtc4         | -1.263467504 | 4.283455599 | 2.60692E-11 | 3.51644E-10 |
| Rap1gap       | -1.26356531  | 1.174873937 | 3.35836E-05 | 0.00016511  |
| Rpph1         | -1.264305696 | 10.60914404 | 0.001724788 | 0.005288343 |
| Ly86          | -1.264787446 | 6.953252327 | 1.11404E-16 | 2.43142E-15 |
| B3galt6       | -1.264792452 | 3.766961931 | 1.86679E-06 | 1.21507E-05 |
| Glrx3         | -1.265084    | 3.49008251  | 4.77932E-05 | 0.00022526  |
| Cdca2         | -1.265606081 | 6.789123221 | 6.6218E-16  | 1.38347E-14 |
| Klhl17        | -1.265707563 | 3.835246475 | 7.00519E-10 | 7.9675E-09  |
| Rab26         | -1.265950782 | 1.481384113 | 3.64681E-05 | 0.000177262 |
| Alox5ap       | -1.26804963  | 6.292797903 | 3.16524E-12 | 4.61934E-11 |
| Rhbdd3        | -1.26837092  | 2.668698016 | 2.08586E-05 | 0.000108624 |
| Cebpa         | -1.268473981 | 3.790344284 | 4.90431E-07 | 3.53724E-06 |
| Ccdc51        | -1.268864363 | 3.868427903 | 5.23004E-06 | 3.10394E-05 |
| Trappc6a      | -1.268876296 | 4.041286054 | 0.000272446 | 0.001067268 |
| Plk1          | -1.269472138 | 5.665504215 | 2.286E-11   | 3.09389E-10 |
| Gsn           | -1.269772    | 8.273178141 | 6.47482E-11 | 8.32585E-10 |
| Rpl12         | -1.269998669 | 3.792436741 | 1.12442E-06 | 7.63456E-06 |
| Fancd2        | -1.270328176 | 6.250524041 | 2.6544E-13  | 4.30425E-12 |
| Pop7          | -1.271311942 | 3.755565246 | 6.76846E-05 | 0.000307641 |
| Snord47       | -1.271940802 | 1.994002123 | 0.000828146 | 0.002804397 |
| Espl1         | -1.274706116 | 5.581436645 | 4.6816E-11  | 6.1439E-10  |
| Tomm40l       | -1.27533324  | 4.531427773 | 1.17239E-08 | 1.11469E-07 |
| Kifc1         | -1.275779187 | 4.650068627 | 8.27601E-11 | 1.05413E-09 |
| Il12rb2       | -1.276291891 | 1.156400825 | 0.000762174 | 0.002609444 |
| Trim47        | -1.276399177 | 2.003655389 | 0.000414226 | 0.001534878 |
| Spc25         | -1.277919232 | 5.982557088 | 7.03676E-12 | 1.00396E-10 |

|               |              |             |             |             |
|---------------|--------------|-------------|-------------|-------------|
| Shcbp1        | -1.279045645 | 6.640132848 | 4.83251E-10 | 5.62848E-09 |
| B230312C02Rik | -1.279116498 | 2.040037222 | 2.80317E-06 | 1.75205E-05 |
| Anln          | -1.279675073 | 7.858255218 | 9.37594E-15 | 1.78011E-13 |
| Fam110a       | -1.279970407 | 2.470010504 | 4.94745E-07 | 3.5587E-06  |
| Abhd17a       | -1.282331608 | 5.034990031 | 0.001516072 | 0.004724512 |
| B230217C12Rik | -1.282852371 | 1.917961814 | 8.68447E-07 | 6.00771E-06 |
| Asrgl1        | -1.283031502 | 4.948257954 | 1.99321E-14 | 3.63064E-13 |
| Rnf187        | -1.286202172 | 6.516091121 | 2.20277E-06 | 1.41029E-05 |
| Sap18         | -1.286220256 | 3.997620587 | 4.82128E-10 | 5.6208E-09  |
| Anapc15       | -1.287017884 | 3.908807393 | 1.02825E-07 | 8.32569E-07 |
| Emp1          | -1.287120709 | 7.393847036 | 1.52676E-15 | 3.09776E-14 |
| Lsp1          | -1.287553205 | 5.821205639 | 1.12112E-11 | 1.56453E-10 |
| Wdpcp         | -1.289456927 | 3.222989536 | 1.54189E-08 | 1.43559E-07 |
| Cdkn2d        | -1.289835612 | 4.401059358 | 1.71288E-09 | 1.85086E-08 |
| C1d           | -1.29090699  | 5.663148111 | 6.44623E-08 | 5.38134E-07 |
| Acaa1a        | -1.291886515 | 5.665170554 | 1.55307E-06 | 1.02575E-05 |
| Mbd3          | -1.292004329 | 5.975860047 | 0.000407482 | 0.001514057 |
| 2810025M15Rik | -1.292176278 | 6.035664033 | 2.80646E-10 | 3.34593E-09 |
| Atp5o         | -1.293346075 | 6.389180316 | 4.54113E-08 | 3.87644E-07 |
| Wrb           | -1.293492042 | 4.92757185  | 1.81489E-08 | 1.66544E-07 |
| E2f2          | -1.293728146 | 4.772637578 | 2.75056E-11 | 3.69783E-10 |
| Dbndd2        | -1.295359714 | 3.126860974 | 0.000332782 | 0.001270805 |
| 2410016O06Rik | -1.295853283 | 5.563258665 | 1.62351E-08 | 1.50694E-07 |
| Cenpp         | -1.296096933 | 4.168779001 | 4.13052E-10 | 4.83878E-09 |
| Gas2          | -1.299727117 | 3.177809495 | 2.50833E-09 | 2.62378E-08 |
| Wdr8          | -1.299772011 | 3.777421381 | 5.09147E-05 | 0.000237844 |
| Tfdp2         | -1.299846501 | 5.220079906 | 4.93358E-15 | 9.63879E-14 |
| Nmral1        | -1.301191237 | 5.460418699 | 1.26217E-11 | 1.7553E-10  |
| Ccnf          | -1.301368985 | 5.960154626 | 1.04939E-14 | 1.98304E-13 |
| Enkd1         | -1.302547685 | 3.032725747 | 7.79935E-07 | 5.44516E-06 |
| Bloc1s1       | -1.302798183 | 3.443500023 | 2.68839E-05 | 0.00013575  |
| Zfp775        | -1.304386809 | 1.458074238 | 1.45041E-05 | 7.85723E-05 |
| Smpdl3b       | -1.304532272 | 6.067173499 | 2.71142E-12 | 3.9907E-11  |
| Tvp23a        | -1.308534479 | 1.188408507 | 2.85061E-05 | 0.000142684 |
| Dut           | -1.308903551 | 7.037035794 | 2.58713E-13 | 4.21113E-12 |
| Kif14         | -1.309944583 | 6.395355368 | 5.10172E-17 | 1.15079E-15 |
| Havcr2        | -1.311189811 | 4.892837587 | 8.17531E-12 | 1.15322E-10 |
| Tbc1d16       | -1.311306051 | 5.753014326 | 3.04085E-07 | 2.29494E-06 |
| Fbxl8         | -1.311486613 | 1.298120715 | 0.001380673 | 0.0043507   |
| Yars2         | -1.313375882 | 5.129227606 | 2.49897E-05 | 0.000127775 |
| Rpl13         | -1.31432537  | 5.742273192 | 6.34259E-05 | 0.000290025 |
| Card11        | -1.314682297 | 4.783333412 | 2.59002E-13 | 4.21113E-12 |
| Amica1        | -1.314717445 | 3.134883731 | 2.27848E-09 | 2.39577E-08 |
| Gm17745       | -1.315146311 | 1.241805016 | 1.9906E-06  | 1.28804E-05 |
| Nhej1         | -1.315215111 | 2.188459315 | 2.53881E-05 | 0.000129321 |

|               |              |             |             |             |
|---------------|--------------|-------------|-------------|-------------|
| Lair1         | -1.315954369 | 4.724189232 | 4.93148E-10 | 5.73824E-09 |
| Arf2          | -1.317490906 | 5.715277731 | 5.07773E-10 | 5.88579E-09 |
| Pltp          | -1.318957237 | 4.384108182 | 4.01865E-08 | 3.44989E-07 |
| Hmgb2         | -1.320149605 | 6.19986274  | 4.71201E-11 | 6.17044E-10 |
| Adgr1         | -1.32131786  | 4.399238327 | 6.10765E-09 | 6.07405E-08 |
| Rgl2          | -1.321908915 | 5.257326173 | 4.12442E-07 | 3.01504E-06 |
| Pgam1         | -1.32219956  | 4.809252029 | 0.000367369 | 0.001385844 |
| Kif20a        | -1.324257759 | 7.70503195  | 4.01407E-14 | 7.12939E-13 |
| Kif15         | -1.324336148 | 7.782074195 | 1.32035E-15 | 2.69467E-14 |
| Rpp25l        | -1.32474319  | 3.851817876 | 5.05481E-06 | 3.00731E-05 |
| Pnpla7        | -1.324896067 | 5.281999949 | 9.68527E-13 | 1.4888E-11  |
| Ckb           | -1.32550476  | 6.842198426 | 7.75638E-16 | 1.61709E-14 |
| Peg12         | -1.326977336 | 2.582664709 | 3.49834E-05 | 0.000170868 |
| Hist1h2af     | -1.328940835 | 4.488451792 | 0.001580475 | 0.004897491 |
| Best1         | -1.330904634 | 2.305829142 | 6.3371E-06  | 3.71726E-05 |
| Fdxr          | -1.332806785 | 3.847622825 | 5.20741E-07 | 3.73018E-06 |
| Slc25a26      | -1.333457357 | 2.511164466 | 0.000882882 | 0.002955056 |
| Armc6         | -1.334231131 | 3.819552606 | 0.000166853 | 0.000693102 |
| Kank2         | -1.334656933 | 3.506238448 | 2.76232E-09 | 2.87457E-08 |
| Sdhaf4        | -1.335095127 | 3.392428341 | 0.000340207 | 0.001297523 |
| Asb13         | -1.336093995 | 2.609774383 | 6.29579E-09 | 6.24577E-08 |
| Hebp1         | -1.336190372 | 1.744347847 | 4.86869E-07 | 3.51457E-06 |
| Bphl          | -1.336961747 | 2.708019574 | 0.000109885 | 0.000478273 |
| S100a4        | -1.337038964 | 10.29769554 | 6.15825E-11 | 7.95254E-10 |
| 2610507I01Rik | -1.337183491 | 1.469357606 | 1.4322E-06  | 9.51111E-06 |
| Plau          | -1.338372048 | 6.938316507 | 1.78938E-17 | 4.16023E-16 |
| Gm6682        | -1.339475787 | 3.812658512 | 0.000658004 | 0.002294963 |
| Zranb3        | -1.34061727  | 4.354056993 | 6.3315E-12  | 9.06542E-11 |
| Per3          | -1.341778987 | 1.977640572 | 1.88123E-07 | 1.4626E-06  |
| Wdr34         | -1.342742525 | 3.873829382 | 1.99185E-05 | 0.000104492 |
| Ndc80         | -1.343016307 | 6.674188576 | 9.86664E-16 | 2.0395E-14  |
| Fam98c        | -1.34420336  | 1.94225492  | 0.000233216 | 0.000932939 |
| Ankrd10       | -1.344551994 | 5.52534362  | 1.57506E-08 | 1.46533E-07 |
| AI413582      | -1.344916811 | 3.716918459 | 1.74825E-07 | 1.36623E-06 |
| Lgals1        | -1.345166936 | 7.869206678 | 2.93887E-14 | 5.26605E-13 |
| Ntmt1         | -1.345376755 | 4.010743831 | 8.98534E-05 | 0.000397369 |
| Tgfbr1        | -1.346983195 | 7.612471998 | 3.08133E-14 | 5.50504E-13 |
| Snhg7         | -1.347873103 | 3.365810343 | 0.000249666 | 0.000989803 |
| Kif2c         | -1.350418113 | 6.504386697 | 2.34823E-13 | 3.84493E-12 |
| Pdpx          | -1.351612089 | 3.217795751 | 0.000260174 | 0.00102688  |
| Ppcdc         | -1.354114601 | 4.609071298 | 3.63701E-10 | 4.28135E-09 |
| Cav2          | -1.355460614 | 3.575892762 | 1.9646E-09  | 2.09482E-08 |
| Mri1          | -1.356260232 | 4.413883212 | 2.26006E-10 | 2.72399E-09 |
| Slc16a7       | -1.356475622 | 3.270334213 | 3.13137E-07 | 2.35592E-06 |
| Cdk2ap1       | -1.356859805 | 4.680273553 | 6.59297E-07 | 4.64036E-06 |



|               |              |             |             |             |
|---------------|--------------|-------------|-------------|-------------|
| Mxd3          | -1.35779038  | 2.306030921 | 1.48532E-07 | 1.17362E-06 |
| 2810417H13Rik | -1.359230631 | 7.114382291 | 5.13057E-15 | 9.99142E-14 |
| Gm6402        | -1.360786111 | 4.035953339 | 4.79977E-05 | 0.00022596  |
| Faap100       | -1.363642765 | 3.725124011 | 5.83521E-05 | 0.000268548 |
| Cox5a         | -1.365195575 | 6.274638494 | 2.47511E-05 | 0.00012677  |
| 1600002K03Rik | -1.366464802 | 2.245072953 | 0.001433224 | 0.004492919 |
| Cuta          | -1.366498442 | 4.616093275 | 5.55865E-09 | 5.54628E-08 |
| Sac3d1        | -1.366626674 | 3.468729556 | 0.00059723  | 0.002109726 |
| Casc5         | -1.368248649 | 7.655206137 | 3.28336E-15 | 6.5306E-14  |
| Mum1          | -1.37156922  | 5.24523342  | 1.56918E-09 | 1.70931E-08 |
| Hscb          | -1.3720006   | 3.413800963 | 5.74723E-10 | 6.63012E-09 |
| Mrps14        | -1.380652217 | 5.726645839 | 3.4499E-05  | 0.000168843 |
| Snord100      | -1.38124416  | 1.265826644 | 0.000191535 | 0.000784068 |
| Agap1         | -1.381768387 | 6.408055211 | 1.11776E-14 | 2.09914E-13 |
| Pdcd2l        | -1.383154077 | 3.892223142 | 2.75569E-07 | 2.09539E-06 |
| Mnd1-ps       | -1.385714877 | 3.732010922 | 8.17934E-07 | 5.68098E-06 |
| Mrpl48        | -1.387944871 | 3.922714502 | 3.80295E-06 | 2.30903E-05 |
| Dctpp1        | -1.388227216 | 5.552066965 | 1.84566E-10 | 2.25141E-09 |
| H2afv         | -1.389131203 | 4.476267557 | 1.10931E-14 | 2.08651E-13 |
| Engase        | -1.389574267 | 2.898784961 | 7.56491E-05 | 0.000340267 |
| Bmyc          | -1.390623118 | 3.455660404 | 5.07454E-09 | 5.09262E-08 |
| Fanci         | -1.391643348 | 5.274931061 | 6.28602E-17 | 1.39711E-15 |
| Dusp28        | -1.393464334 | 2.146648987 | 5.19005E-05 | 0.000241796 |
| 2410127L17Rik | -1.39434115  | 1.612322342 | 0.003507581 | 0.009733638 |
| Neil3         | -1.395037078 | 4.758580779 | 1.22395E-10 | 1.52527E-09 |
| Cdk1          | -1.395716527 | 7.792664009 | 1.42799E-15 | 2.9071E-14  |
| Atp5j2        | -1.400647718 | 5.658547356 | 2.18895E-06 | 1.4029E-05  |
| Particl       | -1.400874311 | 2.409445742 | 3.71399E-06 | 2.26068E-05 |
| Fancf         | -1.40200036  | 3.535185462 | 9.297E-11   | 1.18045E-09 |
| Dhrs7b        | -1.402766641 | 4.854953618 | 1.9196E-06  | 1.24609E-05 |
| Lgmn          | -1.404058224 | 8.399303978 | 4.05453E-13 | 6.45369E-12 |
| Fcrl1         | -1.412697333 | 5.848407469 | 8.73776E-17 | 1.92788E-15 |
| Siva1         | -1.415833057 | 4.97217924  | 1.94671E-09 | 2.08308E-08 |
| Ect2          | -1.41645958  | 6.627968476 | 4.69212E-18 | 1.14588E-16 |
| Bcl6          | -1.417431933 | 4.786050556 | 9.85104E-13 | 1.51237E-11 |
| Bub1b         | -1.419442923 | 8.213117985 | 4.98943E-16 | 1.05291E-14 |
| Exosc5        | -1.41998092  | 5.423651576 | 2.10354E-09 | 2.23315E-08 |
| Galk1         | -1.420113367 | 5.363797995 | 9.56741E-06 | 5.40532E-05 |
| Cep89         | -1.424063972 | 4.502606156 | 1.83018E-14 | 3.34878E-13 |
| 2210408F21Rik | -1.424596599 | 2.533995814 | 1.06229E-05 | 5.94617E-05 |
| Aurkb         | -1.426309758 | 6.437308285 | 7.69422E-15 | 1.47469E-13 |
| A430046D13Rik | -1.426614529 | 1.346084139 | 9.05741E-07 | 6.25142E-06 |
| Rad51b        | -1.426751075 | 3.148544777 | 1.27563E-10 | 1.58642E-09 |
| Tnfrsf12a     | -1.430461787 | 2.963692284 | 4.9491E-05  | 0.000231999 |
| Ndufc1        | -1.430720513 | 3.051204312 | 0.00010036  | 0.000441258 |

|               |              |             |             |             |
|---------------|--------------|-------------|-------------|-------------|
| Fam173a       | -1.430848976 | 3.68397486  | 1.60112E-05 | 8.58919E-05 |
| Plcb4         | -1.431366735 | 6.940006584 | 2.7206E-11  | 3.66162E-10 |
| Sptssa        | -1.431795414 | 6.083135785 | 3.87989E-10 | 4.55839E-09 |
| Rps23         | -1.433723517 | 2.834736522 | 0.000849247 | 0.00285431  |
| 4930427A07Rik | -1.435497075 | 3.53191202  | 2.08157E-05 | 0.000108541 |
| Pgp           | -1.440206169 | 4.790679951 | 1.22274E-06 | 8.22836E-06 |
| Uqcrfs1       | -1.440407463 | 6.31954586  | 3.51781E-06 | 2.15535E-05 |
| Cks1b         | -1.441147761 | 6.319544262 | 2.24589E-17 | 5.19168E-16 |
| Rfc4          | -1.441752683 | 5.204309586 | 6.61009E-09 | 6.53616E-08 |
| Arhgap24      | -1.441963001 | 4.139750698 | 1.58225E-12 | 2.39273E-11 |
| Gins1         | -1.442310101 | 4.917320239 | 4.76228E-15 | 9.31915E-14 |
| Kifc5b        | -1.443967835 | 3.549896217 | 3.21E-08    | 2.80337E-07 |
| Psmg3         | -1.445072614 | 4.249954821 | 0.000258925 | 0.001022614 |
| 1700025G04Rik | -1.446540159 | 6.965208515 | 6.87832E-19 | 1.73577E-17 |
| 6430531B16Rik | -1.44723318  | 3.120682083 | 2.01316E-09 | 2.14283E-08 |
| 2900026A02Rik | -1.448617777 | 3.335190122 | 1.12673E-09 | 1.24983E-08 |
| Abhd15        | -1.448966633 | 2.670641907 | 1.76412E-05 | 9.3723E-05  |
| Qdpr          | -1.449958174 | 5.415194952 | 2.30755E-05 | 0.000118841 |
| Pttg1         | -1.454326528 | 5.039002445 | 3.15497E-16 | 6.71638E-15 |
| Rab34         | -1.455479374 | 3.635725052 | 2.28022E-08 | 2.05814E-07 |
| Epha2         | -1.456855601 | 1.477817343 | 1.20886E-07 | 9.67166E-07 |
| Tmem205       | -1.458010317 | 3.824619893 | 4.32759E-05 | 0.00020565  |
| Cyc1          | -1.458353667 | 6.170673759 | 4.09506E-05 | 0.000196216 |
| Ppp1r14b      | -1.458772625 | 5.831529778 | 2.80491E-05 | 0.000140687 |
| Id2           | -1.459195958 | 5.67761335  | 8.98276E-18 | 2.12932E-16 |
| Tmem147       | -1.459751238 | 5.197848826 | 7.13982E-06 | 4.14795E-05 |
| Trim65        | -1.460887153 | 2.761719221 | 3.76106E-09 | 3.84453E-08 |
| Pcsk4         | -1.464501445 | 1.314245493 | 6.03343E-05 | 0.000276829 |
| Nubpl         | -1.464927519 | 2.189320831 | 0.000180856 | 0.000744381 |
| Qrsl1         | -1.465715351 | 4.013055164 | 1.18185E-07 | 9.48063E-07 |
| Zfp41         | -1.465923546 | 3.46101367  | 2.58007E-08 | 2.29966E-07 |
| Cenpl         | -1.467067477 | 4.674246646 | 8.12009E-06 | 4.65713E-05 |
| Nav2          | -1.467211414 | 4.324521958 | 4.9874E-10  | 5.79548E-09 |
| Lgals3        | -1.470181804 | 8.208530977 | 1.96701E-13 | 3.25942E-12 |
| Abi3          | -1.470336496 | 3.156047418 | 7.3123E-10  | 8.28568E-09 |
| Fhad1         | -1.471008971 | 1.763129526 | 0.000704473 | 0.002435994 |
| Uap1l1        | -1.471256227 | 5.271366209 | 5.89021E-09 | 5.87227E-08 |
| Tmed2         | -1.472785761 | 4.625369144 | 0.000779377 | 0.002657824 |
| Saysd1        | -1.473557718 | 2.909133906 | 2.13944E-05 | 0.000111176 |
| Spag5         | -1.47394496  | 6.547106965 | 2.55897E-17 | 5.90416E-16 |
| Pros1         | -1.475902111 | 3.674857845 | 8.19216E-13 | 1.26571E-11 |
| Prtg          | -1.476402662 | 4.986866901 | 1.30455E-12 | 1.99269E-11 |
| Fam105a       | -1.478618065 | 6.169023331 | 2.17753E-19 | 5.66017E-18 |
| G2e3          | -1.478788153 | 6.478254258 | 5.4184E-17  | 1.21995E-15 |
| Ndufab1       | -1.479544868 | 2.875217489 | 0.000885893 | 0.002963498 |

|           |              |             |             |             |
|-----------|--------------|-------------|-------------|-------------|
| Ankdd1b   | -1.483902969 | 1.282284036 | 0.000106748 | 0.000466632 |
| Gpx4      | -1.485336512 | 1.898533955 | 0.001186005 | 0.00382115  |
| Tlr13     | -1.485879823 | 5.407105824 | 1.51344E-19 | 4.00269E-18 |
| Cdca3     | -1.487369647 | 5.875845711 | 1.47892E-17 | 3.45832E-16 |
| Zfp773    | -1.489452033 | 1.488819054 | 3.42195E-08 | 2.9692E-07  |
| Hist2h2bb | -1.491161327 | 10.04917198 | 6.7701E-13  | 1.05406E-11 |
| Loxl3     | -1.492262873 | 3.661184935 | 1.07186E-13 | 1.83382E-12 |
| Lpin3     | -1.492866443 | 2.53632447  | 2.79832E-10 | 3.33951E-09 |
| Rps4x     | -1.493827952 | 7.819194811 | 2.74915E-06 | 1.72362E-05 |
| Gm10069   | -1.494854321 | 2.788798609 | 5.59156E-07 | 3.98884E-06 |
| Adat3     | -1.496927515 | 1.237498642 | 0.000166955 | 0.000693291 |
| Dnph1     | -1.49779618  | 5.081694766 | 3.44208E-10 | 4.06374E-09 |
| Rnd3      | -1.498537846 | 2.968997304 | 5.05935E-09 | 5.0858E-08  |
| Hcst      | -1.500231417 | 1.824274767 | 3.69292E-05 | 0.000179432 |
| Klf2      | -1.500962805 | 2.127671913 | 4.76488E-06 | 2.85022E-05 |
| Slc9a9    | -1.501289332 | 1.942817943 | 2.42719E-08 | 2.17782E-07 |
| Ndufb8    | -1.503275074 | 6.786098392 | 3.94617E-07 | 2.89697E-06 |
| Hmmr      | -1.504459345 | 7.418537277 | 4.78941E-20 | 1.30663E-18 |
| Rpa3      | -1.504501662 | 4.16252454  | 8.21596E-08 | 6.76546E-07 |
| Hist1h2bn | -1.506921655 | 6.983330393 | 0.000239508 | 0.000953702 |
| Ugt1a6a   | -1.507904444 | 1.545832195 | 1.50954E-07 | 1.19043E-06 |
| Mpc2      | -1.507966862 | 4.625793379 | 7.98278E-06 | 4.58707E-05 |
| Plxnd1    | -1.508156167 | 6.299167589 | 2.11689E-11 | 2.87465E-10 |
| Cxcr3     | -1.509927503 | 2.790190673 | 2.84499E-09 | 2.95045E-08 |
| Zfp524    | -1.510706051 | 2.122700995 | 1.78565E-08 | 1.64483E-07 |
| Miip      | -1.51169925  | 3.964529231 | 4.60355E-13 | 7.27974E-12 |
| Calhm2    | -1.514524084 | 4.00534397  | 1.81961E-11 | 2.49425E-10 |
| Snord16a  | -1.51470364  | 1.457301492 | 7.85404E-07 | 5.48018E-06 |
| Ppia      | -1.517546375 | 2.256076307 | 0.000161227 | 0.000671578 |
| Coq6      | -1.517555918 | 4.074237605 | 5.35469E-07 | 3.82663E-06 |
| Vash1     | -1.51849198  | 2.527971002 | 8.24549E-10 | 9.28231E-09 |
| Hn1       | -1.518498771 | 6.705824839 | 2.14693E-08 | 1.94508E-07 |
| Fv1       | -1.518913464 | 1.583921134 | 2.24083E-08 | 2.02561E-07 |
| Pddc1     | -1.518998145 | 3.209192317 | 1.31619E-05 | 7.23042E-05 |
| Serpib8   | -1.519117834 | 6.017446943 | 2.48288E-21 | 7.46281E-20 |
| Syne3     | -1.522668435 | 6.619369672 | 2.19213E-10 | 2.64738E-09 |
| Mdh1      | -1.523231219 | 7.720575061 | 5.63713E-13 | 8.82203E-12 |
| Pald1     | -1.52509805  | 4.771969821 | 8.2042E-14  | 1.42579E-12 |
| Aldh16a1  | -1.525884823 | 5.368146405 | 4.86377E-07 | 3.51311E-06 |
| Cep72     | -1.52883898  | 2.900855511 | 2.73695E-09 | 2.85062E-08 |
| Fam185a   | -1.529220348 | 4.659033727 | 5.67386E-17 | 1.27273E-15 |
| Comtd1    | -1.529910202 | 4.578888984 | 1.61835E-10 | 1.99016E-09 |
| Ak1       | -1.534990081 | 1.63284414  | 7.09807E-09 | 6.97881E-08 |
| Ffar4     | -1.536887091 | 1.530199943 | 0.000144379 | 0.000609998 |
| Nme2      | -1.537289144 | 6.498764284 | 6.0093E-05  | 0.000275931 |

|               |              |             |             |             |
|---------------|--------------|-------------|-------------|-------------|
| Cadm1         | -1.539368374 | 8.0685418   | 1.49951E-13 | 2.52622E-12 |
| Tomt          | -1.541584843 | 1.458736171 | 2.31838E-08 | 2.08947E-07 |
| Tmc6          | -1.541760834 | 2.906059998 | 0.000194    | 0.00079309  |
| Angpt2        | -1.541961625 | 3.952071677 | 6.3422E-15  | 1.2272E-13  |
| Rpl15         | -1.542929491 | 5.122169448 | 1.20481E-16 | 2.62008E-15 |
| Ndufs8        | -1.544203494 | 6.342444747 | 1.08766E-10 | 1.36811E-09 |
| Macrodl       | -1.544705672 | 1.671071156 | 2.44531E-08 | 2.18922E-07 |
| Snord15a      | -1.545910143 | 1.192074592 | 0.000732339 | 0.002519403 |
| Cbr3          | -1.546412817 | 1.895399788 | 1.7719E-07  | 1.38382E-06 |
| Hist1h3e      | -1.548943696 | 6.572103133 | 7.89817E-10 | 8.92449E-09 |
| Zcwpw1        | -1.551451397 | 2.60991407  | 5.25285E-10 | 6.07715E-09 |
| Wdr90         | -1.551749219 | 3.351489446 | 1.55045E-06 | 1.02458E-05 |
| Rps19         | -1.559667197 | 5.729430956 | 1.36556E-05 | 7.44754E-05 |
| Rcbtb2        | -1.563522218 | 4.596156085 | 9.24681E-14 | 1.60009E-12 |
| Uqcr11        | -1.563683193 | 4.964598123 | 1.74786E-06 | 1.14557E-05 |
| Avpi1         | -1.566798962 | 4.441003105 | 2.38178E-11 | 3.21993E-10 |
| Rasal1        | -1.56751978  | 2.44303497  | 1.76554E-09 | 1.90606E-08 |
| Cenpn         | -1.56931908  | 5.010585547 | 1.04774E-19 | 2.80161E-18 |
| Aarsd1        | -1.569419706 | 5.519730915 | 6.35788E-11 | 8.18417E-10 |
| Slc2a8        | -1.569921826 | 1.810571879 | 5.97156E-06 | 3.52502E-05 |
| Mafb          | -1.570972596 | 3.082191686 | 5.63281E-08 | 4.73821E-07 |
| Kif11         | -1.573202256 | 8.372729207 | 1.22788E-19 | 3.25455E-18 |
| Tmem143       | -1.576283731 | 3.507123864 | 3.88684E-11 | 5.14549E-10 |
| Kbtbd3        | -1.576943405 | 1.345626815 | 3.79171E-06 | 2.30336E-05 |
| Hist2h2ac     | -1.578408982 | 8.10698849  | 6.7808E-14  | 1.18351E-12 |
| 1810011H11Rik | -1.578836574 | 3.892847503 | 9.85212E-12 | 1.38123E-10 |
| Gpt           | -1.580826516 | 2.080355392 | 5.24592E-08 | 4.43741E-07 |
| Ndufa2        | -1.582003308 | 5.127286725 | 1.73938E-05 | 9.24895E-05 |
| Lsm11         | -1.584281046 | 3.855717176 | 3.37382E-08 | 2.93164E-07 |
| Mir99ahg      | -1.587396458 | 3.531975782 | 1.59443E-09 | 1.73525E-08 |
| Ckap2         | -1.587559659 | 6.41460948  | 3.12862E-22 | 1.00257E-20 |
| Cyb5rl        | -1.588322432 | 2.73656689  | 2.32999E-08 | 2.09838E-07 |
| Nuf2          | -1.588450138 | 7.378213695 | 8.33462E-15 | 1.58988E-13 |
| Ttc7          | -1.588725357 | 6.129658897 | 1.39444E-12 | 2.12731E-11 |
| Rps8          | -1.591823593 | 6.541380013 | 1.19815E-05 | 6.63611E-05 |
| Rmrp          | -1.593111678 | 11.35682174 | 0.000610438 | 0.002149486 |
| Spag4         | -1.593463137 | 1.247167648 | 0.000157862 | 0.000659147 |
| A830082N09Rik | -1.59380711  | 1.682114434 | 7.56709E-08 | 6.26522E-07 |
| Hist1h3b      | -1.59674447  | 6.911369347 | 7.96888E-18 | 1.8964E-16  |
| Pmf1          | -1.598220796 | 5.635754303 | 7.26852E-21 | 2.10128E-19 |
| Ndufa11       | -1.598388529 | 4.601899184 | 9.77311E-06 | 5.50357E-05 |
| Snord22       | -1.600762011 | 3.939307417 | 2.48271E-05 | 0.000127051 |
| Nup37         | -1.601800243 | 5.881316933 | 4.01818E-17 | 9.09761E-16 |
| Smpd2         | -1.604338122 | 1.998458009 | 0.000235452 | 0.000940643 |
| Gpnmb         | -1.608456637 | 8.009294654 | 1.10387E-07 | 8.88452E-07 |

|               |              |             |             |             |
|---------------|--------------|-------------|-------------|-------------|
| Uqcrq         | -1.609833948 | 5.686621216 | 0.001659303 | 0.005114283 |
| Tmem9         | -1.612203266 | 2.984506228 | 5.62595E-07 | 4.0063E-06  |
| Hgh1          | -1.613316236 | 3.661296753 | 2.05112E-05 | 0.000107184 |
| AF251705      | -1.61837425  | 4.017161712 | 2.18736E-08 | 1.98023E-07 |
| Racgap1       | -1.61841408  | 7.176587041 | 2.01615E-24 | 7.33381E-23 |
| Trf           | -1.620071104 | 3.110731761 | 4.81641E-08 | 4.08658E-07 |
| Kif22         | -1.620825639 | 6.012541707 | 1.03635E-15 | 2.13492E-14 |
| Hist1h4b      | -1.625667994 | 6.610655759 | 1.79529E-13 | 2.99537E-12 |
| Slc44a2       | -1.626450657 | 6.103586103 | 8.74817E-24 | 3.08042E-22 |
| Pitpnm3       | -1.62851014  | 2.183820503 | 2.79232E-05 | 0.000140229 |
| Ankrd37       | -1.629015949 | 2.386063167 | 4.42031E-07 | 3.21388E-06 |
| Cdkn3         | -1.631325038 | 4.137744037 | 7.33867E-17 | 1.62511E-15 |
| Ppp2r4        | -1.636543952 | 6.755745739 | 2.41061E-06 | 1.53199E-05 |
| Myoz1         | -1.639945693 | 2.073086969 | 2.65956E-08 | 2.36529E-07 |
| Ndufb2        | -1.641632912 | 4.486630779 | 1.32653E-08 | 1.24851E-07 |
| Rrad          | -1.642285077 | 2.083130634 | 2.29135E-05 | 0.000118157 |
| 2010300C02Rik | -1.642481398 | 1.829189465 | 1.79618E-08 | 1.65077E-07 |
| Hist1h1d      | -1.6425386   | 7.945144584 | 2.04436E-12 | 3.04592E-11 |
| Cdkn2c        | -1.643130973 | 5.258208193 | 2.31822E-21 | 6.98524E-20 |
| Tigd5         | -1.6449653   | 1.233570021 | 9.09733E-07 | 6.27182E-06 |
| Cox16         | -1.646992493 | 2.11628663  | 0.000548175 | 0.001953527 |
| Mir682        | -1.64786856  | 7.78177958  | 2.87777E-05 | 0.000143924 |
| Snrpg         | -1.651222333 | 4.088371152 | 2.76768E-06 | 1.73435E-05 |
| Ube2i         | -1.652966807 | 4.431388973 | 2.29295E-08 | 2.06809E-07 |
| Pkd1l2        | -1.653361833 | 2.426909976 | 7.47681E-08 | 6.2032E-07  |
| M1ap          | -1.655449136 | 2.660295296 | 9.35749E-11 | 1.18564E-09 |
| Ptpn18        | -1.657865751 | 6.448282942 | 7.52932E-26 | 2.99025E-24 |
| Myom1         | -1.658377578 | 3.239006656 | 3.03583E-08 | 2.66664E-07 |
| Itga4         | -1.659069867 | 9.748610411 | 2.90624E-16 | 6.23067E-15 |
| Snora61       | -1.660271701 | 1.200126123 | 0.000698381 | 0.002417688 |
| Nrm           | -1.661001517 | 4.23619202  | 9.24069E-16 | 1.91338E-14 |
| Nr2f6         | -1.663586882 | 3.888372958 | 1.30361E-06 | 8.72409E-06 |
| Tmem107       | -1.663670862 | 2.041823828 | 6.01982E-08 | 5.04275E-07 |
| Crnde         | -1.66565227  | 1.330234446 | 1.85369E-07 | 1.44397E-06 |
| Cxxc5         | -1.669204872 | 2.218792222 | 1.16878E-11 | 1.6273E-10  |
| Ptma          | -1.671156583 | 9.644706324 | 5.84752E-11 | 7.55934E-10 |
| Mrps24        | -1.671202384 | 4.813878542 | 3.57361E-05 | 0.000174053 |
| Snora43       | -1.671710921 | 1.284280102 | 0.000217831 | 0.00087865  |
| Acaa2         | -1.672760174 | 4.932936056 | 2.66799E-17 | 6.13232E-16 |
| Cks2          | -1.674943662 | 4.067540846 | 2.73061E-10 | 3.26192E-09 |
| Kdsr          | -1.682716778 | 4.479717083 | 3.04557E-20 | 8.44188E-19 |
| Bckdha        | -1.682910833 | 3.974023237 | 3.94083E-10 | 4.62551E-09 |
| Eldr          | -1.683330919 | 2.527750951 | 3.09368E-09 | 3.18926E-08 |
| Tmed1         | -1.683709441 | 3.265433805 | 2.03803E-06 | 1.31592E-05 |
| Sesn1         | -1.683779136 | 5.282620278 | 5.90883E-20 | 1.6012E-18  |

|               |              |             |             |             |
|---------------|--------------|-------------|-------------|-------------|
| 1110034G24Rik | -1.685742743 | 1.31794783  | 3.48557E-05 | 0.000170314 |
| Kcnn4         | -1.685840197 | 6.42599984  | 1.34433E-20 | 3.82249E-19 |
| Prdx4         | -1.686637792 | 6.063898387 | 1.1858E-07  | 9.50028E-07 |
| Hyal1         | -1.686912442 | 2.116001878 | 5.04268E-10 | 5.85077E-09 |
| Zfp473        | -1.68710059  | 1.725189277 | 2.92558E-10 | 3.47427E-09 |
| Fut7          | -1.688296435 | 1.786724881 | 3.41533E-10 | 4.03609E-09 |
| Adamts10      | -1.68858327  | 4.073973154 | 6.91136E-15 | 1.3352E-13  |
| Pgls          | -1.688662763 | 5.647292278 | 7.36748E-11 | 9.43364E-10 |
| Mcf2l         | -1.697803462 | 3.224053887 | 5.06125E-13 | 7.96193E-12 |
| Lpar5         | -1.697942451 | 1.789228401 | 2.82559E-07 | 2.14451E-06 |
| 4930461G14Rik | -1.698615679 | 1.886213577 | 8.18764E-12 | 1.15322E-10 |
| Ccna2         | -1.704536439 | 8.283109499 | 5.59925E-22 | 1.76166E-20 |
| Lrfr4         | -1.70457721  | 3.755850304 | 9.6707E-11  | 1.22405E-09 |
| Hint2         | -1.705642091 | 2.716677683 | 1.45832E-07 | 1.15304E-06 |
| Pkn3          | -1.706968509 | 4.864756826 | 5.65496E-18 | 1.36451E-16 |
| Npm3          | -1.7090084   | 3.865350895 | 0.000113582 | 0.000492417 |
| Scrn2         | -1.709747975 | 1.956314225 | 6.76697E-06 | 3.94458E-05 |
| Knstrn        | -1.710037293 | 6.903963899 | 1.36563E-20 | 3.87398E-19 |
| Magef1        | -1.710876195 | 1.668528527 | 4.09568E-09 | 4.1585E-08  |
| Cd36          | -1.711422291 | 6.005473031 | 2.64945E-20 | 7.37764E-19 |
| Mfsd3         | -1.713193492 | 1.829007652 | 0.000104562 | 0.000457902 |
| Rassf3        | -1.714547299 | 5.461973206 | 3.23007E-22 | 1.02963E-20 |
| Ube2c         | -1.716403727 | 6.792278641 | 3.68705E-27 | 1.52949E-25 |
| Phyhd1        | -1.723923072 | 1.901655681 | 1.67076E-09 | 1.81019E-08 |
| Retsat        | -1.724532004 | 6.095294097 | 9.02899E-23 | 2.98006E-21 |
| Ydjc          | -1.724903259 | 4.713523277 | 4.15716E-06 | 2.5115E-05  |
| Myh7b         | -1.728429833 | 3.01853436  | 7.70918E-12 | 1.09346E-10 |
| 2010107E04Rik | -1.728483134 | 5.444933812 | 1.66304E-05 | 8.88984E-05 |
| Pax6          | -1.729461541 | 4.579842484 | 5.15749E-12 | 7.42838E-11 |
| Gm14403       | -1.731084297 | 2.877657893 | 4.84533E-11 | 6.32451E-10 |
| Cdc25c        | -1.738028218 | 4.215461112 | 1.45141E-18 | 3.62493E-17 |
| Rps2          | -1.739052306 | 4.511818074 | 2.11911E-05 | 0.000110166 |
| Rps21         | -1.742624482 | 5.707891889 | 1.02617E-05 | 5.76531E-05 |
| Fancd2os      | -1.744898027 | 1.194519702 | 1.73746E-05 | 9.24279E-05 |
| Ndrp2         | -1.75159196  | 7.523612148 | 1.28738E-15 | 2.63412E-14 |
| Cenpf         | -1.753239439 | 8.351720419 | 5.92902E-15 | 1.15093E-13 |
| Hsd3b7        | -1.753681056 | 3.28352408  | 2.19597E-09 | 2.31705E-08 |
| Atp5g1        | -1.76231247  | 3.258150148 | 1.63736E-05 | 8.76418E-05 |
| Ears2         | -1.766346303 | 3.464778678 | 3.34588E-08 | 2.90945E-07 |
| St6galnac6    | -1.77049658  | 4.665976348 | 1.85525E-12 | 2.78127E-11 |
| Mnd1          | -1.770606505 | 3.041925643 | 1.30768E-14 | 2.44066E-13 |
| Parpbp        | -1.778494062 | 5.281398188 | 9.97551E-26 | 3.92316E-24 |
| Pvrl3         | -1.78259926  | 5.11684199  | 3.18163E-20 | 8.75889E-19 |
| Ctsf          | -1.783665678 | 4.30929515  | 4.01626E-17 | 9.09761E-16 |
| Itgb5         | -1.785935881 | 5.484667654 | 6.66796E-18 | 1.59939E-16 |

|               |              |             |             |             |
|---------------|--------------|-------------|-------------|-------------|
| Rpl18         | -1.79133696  | 4.616596408 | 0.000118636 | 0.000511766 |
| Efcab11       | -1.798151564 | 2.829445134 | 3.42167E-15 | 6.79453E-14 |
| Pbk           | -1.800211273 | 6.711498317 | 3.76486E-15 | 7.42732E-14 |
| Mtfp1         | -1.801005468 | 3.079428773 | 3.34738E-12 | 4.87928E-11 |
| Timm8a1       | -1.803831864 | 2.501665431 | 4.22619E-05 | 0.000201543 |
| Tspo          | -1.804252424 | 4.522307321 | 0.000133662 | 0.000569284 |
| Klk8          | -1.811125272 | 1.063726832 | 3.7766E-08  | 3.25533E-07 |
| Sec16b        | -1.815403881 | 1.542309647 | 1.63102E-07 | 1.28206E-06 |
| Msh5          | -1.81577986  | 2.241228629 | 3.99433E-09 | 4.06582E-08 |
| Hnrnpa3       | -1.817721232 | 4.011128668 | 1.50475E-07 | 1.18743E-06 |
| Atg9b         | -1.822050509 | 4.140966217 | 2.12631E-20 | 5.97586E-19 |
| Tspan13       | -1.822716137 | 1.509937171 | 1.56914E-09 | 1.70931E-08 |
| Khk           | -1.823678291 | 3.144838721 | 2.40731E-15 | 4.83578E-14 |
| Slc5a3        | -1.825900326 | 6.697019485 | 2.339E-18   | 5.77032E-17 |
| Mgst2         | -1.825999392 | 3.275539771 | 1.19106E-13 | 2.02631E-12 |
| Bola1         | -1.826419275 | 4.003097423 | 1.02639E-08 | 9.82606E-08 |
| Notch4        | -1.829587119 | 2.014181667 | 1.09599E-07 | 8.82698E-07 |
| Spata5l1      | -1.83151566  | 2.459485714 | 0.002719445 | 0.007807687 |
| Sigirr        | -1.833055248 | 1.932414859 | 7.15597E-07 | 5.00753E-06 |
| Fam174a       | -1.833234443 | 6.391712084 | 5.23632E-21 | 1.54701E-19 |
| Ankrd34a      | -1.834033585 | 1.414982715 | 1.15302E-08 | 1.09713E-07 |
| Atp5e         | -1.836337359 | 5.728092136 | 3.58409E-06 | 2.18711E-05 |
| Uqcc2         | -1.843309697 | 5.257545162 | 2.15912E-10 | 2.61469E-09 |
| Rasgrp3       | -1.843529088 | 8.293186736 | 6.66319E-21 | 1.94017E-19 |
| Sbk1          | -1.84451475  | 2.46605467  | 7.44811E-08 | 6.18362E-07 |
| Fgf13         | -1.846709092 | 1.148621969 | 1.95967E-09 | 2.09141E-08 |
| Frmd4b        | -1.847118297 | 6.945231424 | 2.01993E-15 | 4.07789E-14 |
| 9030617O03Rik | -1.857193648 | 5.698660018 | 2.98324E-28 | 1.33343E-26 |
| Iqgap3        | -1.863613668 | 5.485505674 | 6.5403E-24  | 2.34386E-22 |
| Hist1h3a      | -1.872738946 | 6.286361423 | 8.93429E-14 | 1.55045E-12 |
| Mblac1        | -1.875442215 | 1.35536942  | 5.72299E-10 | 6.60844E-09 |
| 1810043H04Rik | -1.87660967  | 2.905011628 | 8.63121E-05 | 0.000382841 |
| Clec7a        | -1.88035229  | 5.20033167  | 1.73361E-26 | 7.04672E-25 |
| Ech1          | -1.884040598 | 5.013542751 | 3.06388E-13 | 4.94178E-12 |
| Myo1f         | -1.891441156 | 6.83033972  | 1.00897E-31 | 5.22295E-30 |
| H2afz         | -1.893269279 | 5.604787689 | 2.60959E-20 | 7.28339E-19 |
| Phgdh         | -1.893273137 | 4.728628885 | 1.78845E-08 | 1.64584E-07 |
| Fblim1        | -1.897326239 | 3.158105458 | 5.93317E-16 | 1.24555E-14 |
| Ptgs1         | -1.901192674 | 6.357818791 | 6.82231E-30 | 3.23849E-28 |
| Angptl4       | -1.906946141 | 3.17724822  | 3.80691E-17 | 8.67266E-16 |
| Rprl3         | -1.908085398 | 7.226218339 | 0.000272918 | 0.001068334 |
| Cst3          | -1.90863445  | 9.672617913 | 1.32142E-15 | 2.69467E-14 |
| Nutf2         | -1.928334746 | 2.119047934 | 2.11639E-14 | 3.84922E-13 |
| Hist1h3f      | -1.930516209 | 6.360842815 | 4.76252E-10 | 5.56301E-09 |
| Ntpcr         | -1.93064121  | 2.899492405 | 8.90135E-13 | 1.37178E-11 |

|               |              |             |             |             |
|---------------|--------------|-------------|-------------|-------------|
| Rnaseh2c      | -1.93187587  | 3.853116521 | 8.90219E-08 | 7.29869E-07 |
| Klc4          | -1.93394135  | 4.712637794 | 2.15671E-23 | 7.42164E-22 |
| Ank           | -1.936097368 | 9.059846103 | 1.84091E-22 | 5.93058E-21 |
| L3hypdh       | -1.937518102 | 3.901195145 | 5.96088E-19 | 1.52009E-17 |
| Rin1          | -1.940095314 | 2.388247047 | 5.82655E-16 | 1.22529E-14 |
| Cenpw         | -1.944346672 | 3.772609067 | 1.30055E-10 | 1.61244E-09 |
| Qpct          | -1.945432142 | 1.830349456 | 1.05997E-10 | 1.33605E-09 |
| Ankle1        | -1.949001288 | 3.689208354 | 1.27049E-11 | 1.76484E-10 |
| Rab26os       | -1.951657763 | 2.372686801 | 2.10802E-08 | 1.91413E-07 |
| Kif18a        | -1.952227799 | 6.07835266  | 6.80688E-23 | 2.29033E-21 |
| Hist1h4h      | -1.952422743 | 7.323807034 | 6.22482E-11 | 8.02141E-10 |
| Hist1h2bl     | -1.95259701  | 6.322522402 | 6.0198E-07  | 4.2642E-06  |
| Neurl2        | -1.952737714 | 1.853744459 | 1.18733E-09 | 1.31343E-08 |
| Hfe           | -1.964239092 | 3.046276006 | 1.40078E-16 | 3.03536E-15 |
| Hist2h3b      | -1.968939465 | 6.440278684 | 3.80901E-17 | 8.67266E-16 |
| Cx3cr1        | -1.972954442 | 6.018280625 | 1.75088E-21 | 5.32874E-20 |
| Frat1         | -1.974798884 | 1.527347655 | 7.06536E-11 | 9.06596E-10 |
| Cd109         | -1.980089704 | 4.468967028 | 6.70486E-24 | 2.39575E-22 |
| Ppm1j         | -1.98167887  | 3.535711786 | 1.16744E-15 | 2.39681E-14 |
| Ssbp4         | -1.982075822 | 5.592518331 | 2.00045E-13 | 3.3103E-12  |
| Nme3          | -1.986785623 | 2.904937423 | 3.66181E-08 | 3.16599E-07 |
| Nudt14        | -1.988202616 | 3.151487265 | 1.68095E-08 | 1.55431E-07 |
| Tfeb          | -1.995728391 | 3.798197262 | 1.25174E-13 | 2.12357E-12 |
| 9930012K11Rik | -1.996024842 | 1.653363975 | 7.23616E-09 | 7.10304E-08 |
| Tmem160       | -1.998539298 | 3.167751584 | 7.03949E-05 | 0.000318407 |
| Hist1h4f      | -1.999558741 | 6.495763695 | 1.06927E-11 | 1.49735E-10 |
| Susd3         | -1.999999871 | 4.975322374 | 7.2723E-19  | 1.83138E-17 |
| Rps7          | -2.001120919 | 4.332370994 | 6.69908E-07 | 4.70957E-06 |
| Cdc20         | -2.001239475 | 6.322873157 | 9.44007E-29 | 4.25084E-27 |
| Cenpm         | -2.002474946 | 3.854287087 | 5.80654E-18 | 1.3983E-16  |
| Rpl37         | -2.0079751   | 3.702768903 | 3.01602E-06 | 1.8718E-05  |
| Thap3         | -2.011529624 | 2.734574796 | 2.42122E-07 | 1.8527E-06  |
| Tbxas1        | -2.011635216 | 1.740012367 | 6.4785E-13  | 1.01126E-11 |
| Pwwp2b        | -2.013365499 | 3.624240706 | 3.63672E-16 | 7.70132E-15 |
| D830046C22Rik | -2.017481039 | 2.7141006   | 6.36194E-14 | 1.11362E-12 |
| Ube2s         | -2.028355841 | 2.328795758 | 7.30889E-06 | 4.23196E-05 |
| Rabac1        | -2.033832466 | 3.858611232 | 2.65268E-05 | 0.000134218 |
| 5031414D18Rik | -2.035981239 | 3.431991306 | 2.08822E-19 | 5.45142E-18 |
| Rpl37a        | -2.039632784 | 4.706757784 | 4.82977E-05 | 0.000226932 |
| Depdc1b       | -2.046810707 | 3.78271169  | 3.40115E-19 | 8.80303E-18 |
| 1110001J03Rik | -2.049900942 | 2.676455019 | 1.55001E-06 | 1.02458E-05 |
| Angptl2       | -2.050505567 | 7.555801942 | 6.22703E-25 | 2.32802E-23 |
| Serpinb1c     | -2.054482026 | 1.02598982  | 2.29918E-10 | 2.76838E-09 |
| Tspan4        | -2.054847698 | 5.32691312  | 2.12876E-06 | 1.37012E-05 |
| Ppp1cc        | -2.063607958 | 3.401130512 | 1.67051E-05 | 8.91799E-05 |



|               |              |             |             |             |
|---------------|--------------|-------------|-------------|-------------|
| Arhgap15      | -2.066244627 | 3.78771051  | 6.57437E-22 | 2.06309E-20 |
| Hist1h2ai     | -2.066804298 | 6.574630348 | 3.60382E-12 | 5.24047E-11 |
| Ube2cbp       | -2.071612204 | 1.664886429 | 1.10003E-08 | 1.04919E-07 |
| Mcrs1         | -2.072258537 | 3.116574946 | 8.90569E-08 | 7.29869E-07 |
| Pif1          | -2.072836645 | 4.451505113 | 5.56572E-26 | 2.23237E-24 |
| Mmp8          | -2.073073292 | 5.487286278 | 1.91869E-31 | 9.84791E-30 |
| Hist1h2bf     | -2.074211419 | 4.122714161 | 4.97113E-09 | 5.01377E-08 |
| Ccnb2         | -2.076543189 | 7.069435963 | 2.07414E-34 | 1.17402E-32 |
| Alox5         | -2.076719879 | 4.814218124 | 2.99178E-13 | 4.83837E-12 |
| Ocstamp       | -2.07722033  | 2.701040712 | 5.99451E-16 | 1.25625E-14 |
| Mrpl36        | -2.0818483   | 4.723438738 | 5.16413E-09 | 5.17824E-08 |
| Chst3         | -2.084355106 | 3.708660515 | 1.73802E-22 | 5.61405E-21 |
| Fcna          | -2.08591804  | 3.037671096 | 2.15471E-12 | 3.19462E-11 |
| Cbx3          | -2.086942656 | 2.772084784 | 1.11654E-05 | 6.21686E-05 |
| Plxdc1        | -2.088643015 | 1.146120114 | 2.23392E-10 | 2.69517E-09 |
| Gpx1          | -2.102123973 | 8.461541967 | 5.39891E-32 | 2.83104E-30 |
| Hist1h2ac     | -2.103945948 | 4.736965631 | 7.09467E-10 | 8.05415E-09 |
| Emp2          | -2.11650246  | 2.019940932 | 1.37353E-11 | 1.90144E-10 |
| 5730408K05Rik | -2.120969064 | 3.257150742 | 2.88784E-05 | 0.000144368 |
| Rps15a-ps6    | -2.124687023 | 3.827959601 | 1.15258E-05 | 6.39833E-05 |
| Sun2          | -2.126430084 | 4.80274928  | 4.95711E-23 | 1.67258E-21 |
| Hmx2          | -2.133534108 | 2.496058078 | 2.35492E-08 | 2.11768E-07 |
| Fam13c        | -2.134805632 | 3.224050686 | 3.84472E-12 | 5.57071E-11 |
| Hpgds         | -2.138573385 | 5.840125631 | 2.78186E-23 | 9.51882E-22 |
| Dgkg          | -2.13868452  | 4.165669816 | 3.61383E-27 | 1.50427E-25 |
| Klf4          | -2.144234581 | 2.737150958 | 9.43787E-17 | 2.07479E-15 |
| 1110065P20Rik | -2.144599647 | 1.432076185 | 0.0001229   | 0.000528842 |
| B930041F14Rik | -2.144670381 | 1.348370943 | 4.38313E-12 | 6.34323E-11 |
| Gcat          | -2.146519023 | 4.891762419 | 1.96826E-11 | 2.68486E-10 |
| Dner          | -2.147086982 | 4.007405247 | 1.06196E-17 | 2.51241E-16 |
| Oxld1         | -2.153159281 | 2.026148059 | 9.03848E-14 | 1.56628E-12 |
| Hist3h2ba     | -2.154781183 | 1.244974092 | 1.78343E-05 | 9.47072E-05 |
| Gas6          | -2.156146401 | 1.330688982 | 1.82029E-11 | 2.49425E-10 |
| Metrn         | -2.15910454  | 4.012723298 | 9.28356E-08 | 7.58272E-07 |
| Myo7b         | -2.160643464 | 1.102618768 | 4.28064E-07 | 3.1217E-06  |
| Hist2h2ab     | -2.166010848 | 5.007896    | 6.0961E-29  | 2.7553E-27  |
| Fam195a       | -2.168096089 | 3.191700928 | 2.54783E-09 | 2.6628E-08  |
| Tk1           | -2.176306353 | 5.200449177 | 6.609E-14   | 1.15519E-12 |
| Hist1h2an     | -2.179561559 | 6.082566847 | 1.29038E-10 | 1.60148E-09 |
| Tsc22d3       | -2.19169581  | 3.253924755 | 2.88281E-22 | 9.26246E-21 |
| Rgs2          | -2.196749584 | 6.108841383 | 6.81827E-31 | 3.35731E-29 |
| Lhfp12        | -2.198598404 | 5.801249203 | 1.29972E-38 | 8.74638E-37 |
| Rpl38         | -2.209398863 | 3.236196757 | 0.000267684 | 0.00105172  |
| Usp2          | -2.209664503 | 3.29867626  | 3.84979E-19 | 9.92182E-18 |
| Rdm1          | -2.21136383  | 2.606092296 | 2.80661E-09 | 2.91565E-08 |

|               |              |             |             |             |
|---------------|--------------|-------------|-------------|-------------|
| Acp5          | -2.220597552 | 3.659308131 | 2.53795E-20 | 7.0998E-19  |
| Myb           | -2.231459606 | 2.768268448 | 1.85695E-14 | 3.39265E-13 |
| Nusap1        | -2.233249598 | 7.152532923 | 5.86499E-34 | 3.24396E-32 |
| Mir6516       | -2.244178596 | 1.635484502 | 3.79084E-05 | 0.000183453 |
| Gm15421       | -2.247371889 | 4.881772777 | 9.46545E-07 | 6.51214E-06 |
| Fam64a        | -2.264624879 | 5.742137337 | 1.38156E-36 | 8.62623E-35 |
| Kifc3         | -2.26939058  | 5.214862212 | 1.06826E-22 | 3.51626E-21 |
| Ctsh          | -2.275560161 | 3.410073593 | 1.40469E-20 | 3.96621E-19 |
| Nr0b2         | -2.284374563 | 2.016271539 | 3.51422E-15 | 6.9669E-14  |
| Hist1h2bb     | -2.291428649 | 7.809295336 | 1.58345E-19 | 4.17873E-18 |
| Ccnb1         | -2.293714887 | 6.047755409 | 4.00695E-36 | 2.439E-34   |
| Cytip         | -2.298455042 | 3.249852143 | 3.17604E-16 | 6.74936E-15 |
| Adssl1        | -2.310336045 | 5.103320243 | 1.93386E-19 | 5.06114E-18 |
| Cxcl14        | -2.315692705 | 6.92533226  | 1.67541E-41 | 1.24504E-39 |
| Marveld1      | -2.320229443 | 4.112264376 | 4.66087E-21 | 1.38375E-19 |
| Mgst3         | -2.334520759 | 4.923445861 | 4.45156E-23 | 1.50619E-21 |
| Igfbp4        | -2.338420528 | 6.913049681 | 8.0688E-32  | 4.19473E-30 |
| Cdc25b        | -2.33842762  | 5.842824421 | 1.47509E-40 | 1.06992E-38 |
| Sapcd2        | -2.342329884 | 4.611580252 | 1.93767E-30 | 9.38838E-29 |
| Aspm          | -2.345537353 | 8.3861945   | 3.3774E-27  | 1.41071E-25 |
| Smpdl3a       | -2.354861161 | 3.132601837 | 8.238E-25   | 3.04228E-23 |
| Agmo          | -2.362118685 | 3.755327126 | 7.05016E-28 | 3.07189E-26 |
| Grcc10        | -2.3621837   | 4.953052955 | 1.15837E-21 | 3.59778E-20 |
| Ahnak         | -2.36632485  | 11.1281946  | 8.4767E-24  | 3.01109E-22 |
| Hist1h2bh     | -2.366842694 | 5.142231328 | 2.14262E-08 | 1.94263E-07 |
| C130050O18Rik | -2.371987936 | 4.537640471 | 1.17037E-35 | 7.01709E-34 |
| Sepp1         | -2.389855046 | 2.164310482 | 3.14505E-12 | 4.59952E-11 |
| Spink5        | -2.390354088 | 4.929116257 | 2.25212E-30 | 1.08685E-28 |
| Hexb          | -2.419542566 | 6.831689841 | 2.00502E-15 | 4.05457E-14 |
| Rps14         | -2.421129194 | 6.442526914 | 5.0099E-06  | 2.98353E-05 |
| Hist1h1c      | -2.426745101 | 8.956620149 | 7.88961E-11 | 1.00809E-09 |
| Rpl34         | -2.431687352 | 1.050709037 | 0.00020537  | 0.000833381 |
| Trem2         | -2.432473009 | 6.958847422 | 9.93936E-41 | 7.25274E-39 |
| Hist1h4c      | -2.433371715 | 7.114288887 | 1.27142E-09 | 1.40007E-08 |
| H2afx         | -2.433555708 | 7.666695378 | 3.35151E-09 | 3.4375E-08  |
| St6gal1       | -2.447223445 | 5.059118948 | 3.53426E-41 | 2.59457E-39 |
| Slc40a1       | -2.471061164 | 5.550831652 | 8.67352E-20 | 2.33472E-18 |
| Fam83d        | -2.471601107 | 3.593886361 | 1.58684E-18 | 3.95503E-17 |
| Map2k6        | -2.474799178 | 1.680045595 | 1.40463E-14 | 2.60955E-13 |
| Rpl22l1       | -2.488724336 | 3.633319695 | 5.68105E-07 | 4.03841E-06 |
| Frat2         | -2.489180111 | 1.028062564 | 4.88794E-11 | 6.36641E-10 |
| Fgd2          | -2.493936991 | 4.230232849 | 2.34002E-29 | 1.07774E-27 |
| Hist1h2bj     | -2.498948039 | 6.069098389 | 1.94246E-07 | 1.50827E-06 |
| Id3           | -2.501694524 | 5.256181766 | 2.48739E-10 | 2.9802E-09  |
| Hist1h4k      | -2.501782772 | 7.528496111 | 3.87662E-09 | 3.95495E-08 |

|               |              |             |             |             |
|---------------|--------------|-------------|-------------|-------------|
| Sh2d3c        | -2.503897775 | 2.114895145 | 6.83067E-21 | 1.98417E-19 |
| Gm14322       | -2.511437121 | 1.084213926 | 3.2163E-13  | 5.17384E-12 |
| Slc16a12      | -2.531580747 | 6.522961623 | 1.3611E-34  | 7.77688E-33 |
| St8sia4       | -2.536719846 | 8.779389027 | 1.27079E-39 | 8.94949E-38 |
| Snora74a      | -2.553102313 | 4.472546516 | 2.7481E-05  | 0.000138468 |
| Col25a1       | -2.561335509 | 1.323554248 | 2.65432E-17 | 6.1125E-16  |
| AI504432      | -2.586923019 | 1.567809797 | 2.45218E-14 | 4.43994E-13 |
| Hist1h4a      | -2.590186975 | 6.667949443 | 2.64483E-13 | 4.29448E-12 |
| Smad6         | -2.607112701 | 3.01521855  | 7.48594E-18 | 1.7885E-16  |
| Hspb7         | -2.634334794 | 1.596939129 | 9.32636E-11 | 1.18293E-09 |
| Hist1h3i      | -2.646843451 | 6.984697206 | 1.58928E-13 | 2.67003E-12 |
| Ppfia4        | -2.65727161  | 4.524712984 | 1.48343E-26 | 6.05011E-25 |
| Rnase4        | -2.664794917 | 2.487030598 | 6.57835E-25 | 2.44813E-23 |
| Hist1h4i      | -2.684739802 | 6.432952264 | 1.76693E-13 | 2.95212E-12 |
| Calml4        | -2.697199355 | 1.70622976  | 2.93664E-14 | 5.26605E-13 |
| 2700094K13Rik | -2.738631445 | 5.268993982 | 6.19507E-19 | 1.57649E-17 |
| Hist1h1b      | -2.744720153 | 8.763951919 | 1.75599E-12 | 2.63573E-11 |
| Cenpa         | -2.795557903 | 5.910553886 | 1.7882E-19  | 4.70879E-18 |
| Cfh           | -2.801304823 | 6.179117828 | 9.19014E-56 | 1.03074E-53 |
| Hist1h2ag     | -2.80803447  | 5.179574058 | 1.57403E-12 | 2.38328E-11 |
| Endog         | -2.830622894 | 2.265110888 | 2.02428E-10 | 2.45692E-09 |
| Kbtbd11       | -2.841162047 | 7.070982991 | 5.08489E-49 | 4.56246E-47 |
| Prkar1b       | -2.842722183 | 1.237991594 | 3.62685E-13 | 5.80343E-12 |
| Rab3il1       | -2.842798642 | 5.150157312 | 3.328E-38   | 2.17903E-36 |
| Serpinf1      | -2.85645183  | 2.562750035 | 6.90923E-23 | 2.31832E-21 |
| Crip1         | -2.860927316 | 5.846523763 | 6.32367E-15 | 1.22558E-13 |
| Ndrg4         | -2.865758673 | 5.055310195 | 8.29755E-42 | 6.24274E-40 |
| Dbp           | -2.890631426 | 1.780932049 | 4.69498E-19 | 1.20488E-17 |
| Hist1h2ae     | -2.896319087 | 3.47507628  | 9.60828E-09 | 9.2516E-08  |
| Cacng8        | -2.911082891 | 1.781452623 | 2.79775E-12 | 4.10778E-11 |
| Snora78       | -2.914220501 | 2.03112191  | 7.7903E-05  | 0.000349626 |
| Rps15a-ps4    | -2.978940368 | 1.880727258 | 2.9528E-07  | 2.23266E-06 |
| Arhgef39      | -2.979856979 | 4.352717886 | 4.34449E-28 | 1.92061E-26 |
| Clec4a2       | -2.995648264 | 3.758603705 | 2.37189E-27 | 1.0081E-25  |
| Scarna6       | -3.008126498 | 3.747217656 | 8.58513E-06 | 4.90295E-05 |
| Hist1h2bm     | -3.036417249 | 7.412307603 | 2.88839E-14 | 5.19096E-13 |
| Rarb          | -3.045749608 | 1.850607467 | 6.21671E-21 | 1.81891E-19 |
| Terc          | -3.064861296 | 4.443642588 | 2.86007E-07 | 2.16796E-06 |
| Hist1h3c      | -3.077612017 | 6.854299252 | 4.33824E-13 | 6.87815E-12 |
| Hist1h2bp     | -3.081127756 | 4.056153643 | 1.28825E-10 | 1.60047E-09 |
| Lyz1          | -3.087101742 | 6.064407006 | 1.62815E-34 | 9.25907E-33 |
| Hist1h2ah     | -3.107094308 | 4.600726776 | 1.83758E-11 | 2.5151E-10  |
| Cst7          | -3.116917501 | 5.358007024 | 4.12969E-24 | 1.48878E-22 |
| Fam81a        | -3.117077026 | 1.238096595 | 4.80525E-18 | 1.17115E-16 |
| 2310040G24Rik | -3.163315546 | 1.804821447 | 1.44697E-15 | 2.9408E-14  |

|               |              |             |             |             |
|---------------|--------------|-------------|-------------|-------------|
| Psrc1         | -3.164245979 | 4.230289933 | 3.93324E-49 | 3.58221E-47 |
| Abca9         | -3.182804925 | 4.772934283 | 4.57841E-49 | 4.13867E-47 |
| Rgs8          | -3.206867799 | 2.000529402 | 7.63908E-28 | 3.31656E-26 |
| Amz1          | -3.209317316 | 3.389937302 | 8.31353E-18 | 1.97454E-16 |
| Cxcr4         | -3.31015104  | 2.736498997 | 4.95839E-27 | 2.04289E-25 |
| Neurl1b       | -3.314650246 | 4.312884893 | 1.45991E-39 | 1.02219E-37 |
| Gpr141        | -3.31926699  | 2.628998255 | 5.07083E-31 | 2.52769E-29 |
| Syng1         | -3.326598237 | 3.970751741 | 5.20294E-21 | 1.54091E-19 |
| Gpr183        | -3.330800546 | 6.686616264 | 1.27997E-80 | 2.247E-78   |
| Hp            | -3.349909939 | 1.047197435 | 5.494E-16   | 1.15737E-14 |
| Slamf8        | -3.363153556 | 1.439449421 | 8.60403E-25 | 3.1678E-23  |
| F630028O10Rik | -3.3892693   | 3.488902814 | 2.33118E-31 | 1.18149E-29 |
| Hist1h2bk     | -3.39266761  | 6.022465004 | 1.15018E-09 | 1.27467E-08 |
| Cd24a         | -3.422163569 | 2.15181067  | 8.1143E-24  | 2.89084E-22 |
| Scel          | -3.442796607 | 2.774432736 | 9.23124E-24 | 3.2411E-22  |
| Zfp651        | -3.47262675  | 3.667992898 | 2.53387E-38 | 1.6772E-36  |
| Hist1h2bg     | -3.487207107 | 5.667382014 | 6.54208E-10 | 7.46882E-09 |
| Tmem119       | -3.50195143  | 1.355164196 | 1.72666E-22 | 5.59224E-21 |
| Eno3          | -3.515658376 | 5.016722838 | 5.67514E-50 | 5.28792E-48 |
| Icam2         | -3.56191338  | 1.389197474 | 1.17173E-23 | 4.08803E-22 |
| Itga8         | -3.568807821 | 1.551573809 | 3.78413E-28 | 1.68519E-26 |
| Serpinb12     | -3.570854428 | 3.044631305 | 3.94971E-28 | 1.75248E-26 |
| Lifr          | -3.69861439  | 2.026278259 | 1.47145E-30 | 7.18695E-29 |
| Dlg3          | -3.748924716 | 2.343593422 | 4.7143E-38  | 3.05371E-36 |
| S1pr1         | -3.775976416 | 4.512677636 | 1.2567E-54  | 1.32369E-52 |
| Hist1h4n      | -3.904015232 | 6.553581311 | 1.08823E-11 | 1.52039E-10 |
| Myadml2       | -3.912907927 | 1.504583419 | 2.99182E-27 | 1.25833E-25 |
| Gamt          | -3.917326455 | 2.103655091 | 3.02386E-14 | 5.41034E-13 |
| Mir703        | -3.958716242 | 1.692503166 | 4.91111E-07 | 3.53886E-06 |
| Zfyve28       | -3.981250399 | 1.336609945 | 8.60229E-26 | 3.40521E-24 |
| Hist1h4j      | -3.989056071 | 6.790896751 | 1.35853E-10 | 1.6826E-09  |
| Scarna10      | -3.99627026  | 3.251820751 | 1.23464E-06 | 8.29921E-06 |
| Col15a1       | -4.013171425 | 2.217660234 | 1.1578E-30  | 5.67789E-29 |
| Hist1h2ab     | -4.018921509 | 5.925466997 | 1.08382E-09 | 1.20444E-08 |
| Bdh2          | -4.05793841  | 2.651175655 | 1.85549E-18 | 4.59622E-17 |
| Apbb1         | -4.076166957 | 1.035392017 | 3.6863E-18  | 9.02065E-17 |
| Gpr176        | -4.092553272 | 2.492745777 | 1.9885E-17  | 4.60549E-16 |
| Opcml         | -4.111319741 | 1.278730134 | 2.41259E-23 | 8.27867E-22 |
| Olfml3        | -4.157584771 | 2.158456149 | 3.60309E-30 | 1.72507E-28 |
| Odf3l1        | -4.202430539 | 1.080295487 | 1.17447E-23 | 4.08803E-22 |
| Mir1949       | -4.202773564 | 2.946086498 | 3.58278E-07 | 2.65595E-06 |
| Scarna2       | -4.321301401 | 3.748036099 | 1.18117E-06 | 7.98407E-06 |
| Gm5086        | -4.527781738 | 1.886058388 | 1.70709E-25 | 6.58536E-24 |
| Igf1          | -4.677942212 | 3.32955004  | 7.63504E-47 | 6.51291E-45 |
| Hist1h3h      | -4.684402837 | 5.86677888  | 4.81626E-11 | 6.29336E-10 |

|           |              |             |             |             |
|-----------|--------------|-------------|-------------|-------------|
| Hist1h2ad | -4.877444202 | 2.999028544 | 3.41949E-07 | 2.54894E-06 |
| Aqp1      | -5.526863896 | 4.240697094 | 8.85533E-61 | 1.08348E-58 |
| Tgfb1     | -5.537157616 | 1.333118578 | 4.21063E-40 | 3.01795E-38 |
| Cldn11    | -6.495156642 | 3.67251885  | 4.3903E-103 | 9.3297E-101 |

---

**Supplementary Table 2.** qPCR primers used in this study (mouse and human)

| <b>Gene ID</b> | <b>Forward (5'-3')</b>   | <b>Reverse (5'-3-)</b>      | <b>Species</b> |
|----------------|--------------------------|-----------------------------|----------------|
| Isg15          | AAGCAGACTCCTTAATTCCAG    | CCTCCATGGGCCTTCCCTCGA       | Mouse          |
| Irf7           | CTGGAGCCATGGGTATGCA      | AAGCACAAGCCGAGACTGCT        | Mouse          |
| Stat1          | GCAAGCGTAATCTCCAGGA      | GGCTTACCTTCTCTGTTCT         | Mouse          |
| Il1b           | AAGGAGAACCAAGCAACGACAAAA | TGGGGAActCTGCAGACTCAAAct    | Mouse          |
| Il6            | GATGGATGCTACCAAActGGA    | TCTGAAGGActCTGGCTTTG        | Mouse          |
| Il12a          | CCACCCTTGCCCTCCTAAAC     | GGCAGCTCCCTCTTGTTGTG        | Mouse          |
| Ifnb           | TCCCTATGGAGATGACGGAG     | ACCCAGTGCTGGAGAAATTG        | Mouse          |
| Oas2           | ATGCCACTTTTCGTCActCC     | CCTGAGGGTGAAGTCAGACC        | Mouse          |
| Ddx58          | CAGTACATTcAGGCTGAG       | GGCCAGTTTTcCTTGTC           | Mouse          |
| Cd40           | GTTTAAAGTCCCGGATGCGA     | CTCAAGGCTATGCTGTCTGT        | Mouse          |
| Ifih1          | GGCACCATGGGAAGTGATT      | ATTTGGTAAGGCCTGAGCTG        | Mouse          |
| Dhx58          | GAGACCTGGAGGAACCATCA     | CCCTCGAGGTGTTTCCAGTA        | Mouse          |
| Tnfa           | CAGCCTCTTCTCATTcCTGC     | ATGAGAGGGAGGCCATTG          | Mouse          |
| Ccl4           | CTCTCCTCTTGCTCGTGCC      | GTAActCAGTGACCCAGGGCTC      | Mouse          |
| Cxcl11         | GGTCACAGCCATAGCCCTG      | AGCCTTCATAGTAACAATCACTTCAAC | Mouse          |
| Cxcl10         | CTTGAAATCATCCCTGCGAGC    | TAGGActAGCCATCCActGGG       | Mouse          |
| Gapdh          | AGCTTGTCATCAACGGGAAG     | TTTGATGTTAGTGGGGTCTCG       | Mouse          |
| Isg15          | ACTCATCTTTGCCAGTACAGGAG  | CAGCATCTTcACCGTCAGGTC       | Human          |
| Ifnb           | CAGCAATTTTcAGTGTCAGAAGC  | TCATCCTGTcCTTGAGGCAGT       | Human          |
| Il6            | GGCACTGGCAGAAAACAACC     | GCAAGTCTCCTCATTGAATCC       | Human          |
| b-actin        | ATGTACCCTGGCATTGCCGACA   | GACTCGTCATACTCCTGCTTGT      | Human          |
